# Supplementary material for: Toxoplasma gondii-Induced Long-Term Changes in the Upper Intestinal Microflora during the Chronic Stage of Infection
Source: Scientifica (Cairo). 2018 Nov 1;2018:2308619. doi: 10.1155/2018/2308619 (PMC6236704; doi:10.1155/2018/2308619)
Supplement: Supplementary Materials — MS-Excel file (Tables S1–S9) containing metadata information regarding the two animal cohorts along with details on the analyses of the two sequenced 16S rRNA sets is provided. [file 2308619.f1.xlsx]

## Sheet: S1_Table
S1 Table: Results of quality screening in the acute group and the first chronic cohort
ACUTE
sample_name	Group	passed_qiime_filtering	primer_removal_failures	primer_removal_success	phiX_hits	total_chimeras	total_known_contaminant	total_unknown_contaminant	final_clean_seqs
E0_S1_L001.357F	uninfected	29561	3403	26158	0	218	0	82	25858
E1_S2_L001.357F	uninfected	12016	2058	9958	0	56	0	55	9847
E2_S3_L001.357F	uninfected	28036	4181	23855	0	86	0	76	23693
E3_S4_L001.357F	uninfected	11330	1456	9874	0	33	0	28	9813
E4_S5_L001.357F	uninfected	19767	2403	17364	0	65	0	54	17245
G0_S6_L001.357F	infected	33230	3943	29287	0	7	0	81	29199
G1_S7_L001.357F	infected	32148	4121	28027	0	75	0	98	27854
G2_S8_L001.357F	infected	27244	3681	23563	0	79	0	63	23421
G3_S20_L001.357F	infected	23897	3191	20706	0	94	0	65	20547
G4_S9_L001.357F	infected	7116	952	6164	0	30	0	18	6116
								Total	193593
								Average	19359.3
CHRONIC
sample_name	Group	passed_qiime_filtering	primer_removal_failures	primer_removal_success	phiX_hits	total_chimeras	total_known_contaminant	total_unknown_contaminant	final_clean_seqs
A0_S15_L001.357F	infected	53924	7044	46880	0	210	0	161	46509
A2_S16_L001.357F	infected	41200	4732	36468	0	163	0	114	36191
1-4_S17_L001.357F	infected	34528	3784	30744	0	172	1	93	30478
2-2_S18_L001.357F	infected	42258	4988	37270	0	298	0	185	36787
3-3_S19_L001.357F	infected	38532	4758	33774	0	192	0	92	33490
7-2_S10_L001.357F	uninfected	50058	5915	44143	0	176	0	116	43851
7-4_S11_L001.357F	uninfected	32876	2936	29940	0	87	2	61	29790
8-4_S12_L001.357F	uninfected	32648	3754	28894	0	45	0	146	28703
9-0_S13_L001.357F	uninfected	29152	3139	26013	0	42	0	84	25887
9-1_S14_L001.357F	uninfected	38360	4772	33588	0	104	0	120	33364
								Total	345050
								Average	34505

## Sheet: S2_Table
S2 Table: Confirming the presence of T. gondii in the acute group and the first chronic cohort
#SampleID	ACUTE INFECTION	5'S qPCR (Ctvalues)		#SampleID	CHRONIC INFECTION	IgG ELISA
E0	acute_uninfected	NA		7.2	chronic_uninfected	NA
E1	acute_uninfected	NA		7.4	chronic_uninfected	NA
E2	acute_uninfected	NA		8.4	chronic_uninfected	NA
E3	acute_uninfected	NA		9	chronic_uninfected	NA
E4	acute_uninfected	NA		9.1	chronic_uninfected	NA
G0	acute_infected	negative		1.4	chronic_infected	3.903
G1	acute_infected	positive		2.2	chronic_infected	3.992
G2	acute_infected	positive		3.3	chronic_infected	3.756
G3	acute_infected	positive		A0	chronic_infected	3.944
G4	acute_infected	positive		A2	chronic_infected	3.874

## Sheet: S3_Table
S3 Table: Diversity and taxonomy composition in the acute group uninf. vs. inf
Type_c_alphadiv_table_even6116.alphalevel1	mean acute_uninfected (n=5)	var_grp1	stderr_grp1	mean acute_infected (n=5)	var_grp2	stderr_grp2	npdiff_p	npdiff_q	mannwhitney_p	mannwhitney_q	ttest_p	ttest_q	E0	E1	E2	E3	E4	G0	G1	G2	G3	G4
chao1	572.82	16686.3	57.769	945.602	123433	157.12	0.0748	0.642857	0.150794	0.771164	0.0758099	0.583643	410.6	462.1	664.667	622.517	704.217	1215.69	830.773	1200.5	1100.05	381
strong	0.845269	0.00021334	0.00653208	0.867905	0.000670293	0.0115784	0.1154	0.642857	0.150794	0.771164	0.137061	0.583643	0.848004	0.844148	0.850503	0.861767	0.821923	0.910072	0.839396	0.859964	0.867388	0.862705
shannon	3.5997	0.32826	0.256226	2.99634	1.08726	0.466318	0.3388	0.642857	0.420635	0.771164	0.298658	0.583643	2.88293	3.48437	4.01575	3.29472	4.32071	1.2274	3.97816	3.30088	3.39051	3.08476
brillouin_d	2.44259	0.151731	0.174201	2.02946	0.51624	0.321322	0.3274	0.642857	0.420635	0.771164	0.300401	0.583643	1.95212	2.36796	2.73278	2.23451	2.92559	0.809634	2.70587	2.23859	2.29623	2.09699
gini_index	0.992945	5.33657e-06	0.00103311	0.994245	1.98666e-06	0.000630342	0.3508	0.642857	0.690476	0.834035	0.320247	0.583643	0.994711	0.994108	0.992897	0.994026	0.988983	0.996073	0.992789	0.993899	0.993145	0.99532
simpson_reciprocal	6.417	7.72485	1.24297	4.67743	5.7574	1.07307	0.2944	0.642857	0.309524	0.771164	0.321003	0.583643	3.3534	5.58182	9.46673	4.47985	9.2032	1.30154	8.00505	4.32813	5.29981	4.4526
mcintosh_d	0.588231	0.0091951	0.0428838	0.48238	0.0425285	0.0922264	0.375	0.642857	0.309524	0.771164	0.340459	0.583643	0.459798	0.584206	0.68373	0.53437	0.67905	0.125061	0.654933	0.526054	0.572946	0.532907
goods_coverage	0.975965	2.12268e-05	0.00206043	0.973512	2.94743e-05	0.00242793	0.4594	0.6891	0.547619	0.834035	0.463888	0.677511	0.980543	0.979889	0.974984	0.975311	0.969097	0.970733	0.973512	0.971223	0.969261	0.982832
fisher_alpha	50.3924	143.637	5.3598	47.0707	52.8644	3.2516	0.6954	0.765164	0.834035	0.834035	0.613573	0.677511	42.1279	42.6297	48.2452	47.7275	71.2317	44.6515	49.2848	49.2848	55.9095	36.2229
observed_species	241.2	1965.2	19.8252	229	812	12.7436	0.6874	0.765164	0.834035	0.834035	0.621052	0.677511	210	212	234	232	318	220	238	238	263	186
margalef	27.5501	25.8528	2.27388	26.1508	10.6821	1.46165	0.7014	0.765164	0.834035	0.834035	0.621052	0.677511	23.9716	24.201	26.7243	26.4949	36.3588	25.1185	27.1831	27.1831	30.0505	21.2188
PD_whole_tree	25.6562	35.15	2.65141	24.7326	15.3385	1.75148	0.795	0.795	1	NA	0.779822	0.779822	23.6901	19.6965	26.626	22.9663	35.302	21.8329	28.3375	27.2534	26.8874	19.3518
Type_c_otu_table_even6116.phylum	mean acute_uninfected (n=5)	var_grp1	stderr_grp1	mean acute_infected (n=5)	var_grp2	stderr_grp2	npdiff_p	npdiff_q	mannwhitney_p	mannwhitney_q	nbinom_p	nbinom_q	fishers_p	fishers_q	E0	E1	E2	E3	E4	G0	G1	G2	G3	G4
Bacteroidetes	0.00186396	4.0716e-06	0.000902397	0.0681491	0.00884547	0.0420606	0.0142	0.0852	0.015873	0.126984	1.45235e-05	0.000101664	0	0	6	7	33	2	9	76	1366	563	28	51
Other	0.00627861	1.43375e-05	0.00169337	0.0204709	0.00105045	0.0144945	0.5122	0.593	0.753298	0.79717	0.00775642	0.0271475	1.86769e-52	3.26846e-52	28	15	48	27	74	8	470	119	14	15
Deferribacteres	0.00268149	3.5952e-05	0.00268149	0.00029431	3.26156e-07	0.000255404	1	NA	0.79717	0.79717	0.114	0.254776	6.78938e-16	7.92095e-16	0	0	0	0	82	0	0	0	1	8
Firmicutes	0.860399	0.0360879	0.0849563	0.645683	0.136912	0.165476	0.2266	0.3399	0.222222	0.444444	0.148576	0.254776	0	0	5919	5945	3215	5790	5442	5858	1988	1027	5304	5568
Actinobacteria	0.00209287	1.39552e-06	0.000528303	0.000784827	2.49162e-06	0.00070592	0.18	0.3399	0.0906884	0.362753	0.181983	0.254776	2.34175e-05	2.34175e-05	5	23	13	16	7	0	0	0	2	22
Proteobacteria	0.0880968	0.0137125	0.0523689	0.200164	0.0360765	0.0849429	0.222	0.3399	0.150794	0.402116	0.316061	0.368738	0	0	152	125	1811	279	327	173	1852	2955	726	415
Verrucomicrobia	0.0385873	0.00497389	0.0315401	0.0644212	0.0102117	0.0451923	0.593	0.593	0.600402	0.79717	0.701312	0.701312	3.13568e-47	4.38995e-47	6	1	996	2	175	1	439	1452	41	37
Unclassified_Other	0	0	0	3.27011e-05	5.34681e-09	3.27011e-05	1	NA	0.423711	0.677937	1	NA	1	NA	0	0	0	0	0	0	1	0	0	0
Type_c_otu_table_even6116.class	mean acute_uninfected (n=5)	var_grp1	stderr_grp1	mean acute_infected (n=5)	var_grp2	stderr_grp2	npdiff_p	npdiff_q	mannwhitney_p	mannwhitney_q	nbinom_p	nbinom_q	fishers_p	fishers_q	E0	E1	E2	E3	E4	G0	G1	G2	G3	G4
Bacteroidetes_Bacteroidia	0.00173316	3.00224e-06	0.000774885	0.067397	0.00862595	0.0415354	0.018	0.216	0.015873	0.285714	1.6834e-06	2.5251e-05	0	0	6	7	29	2	9	75	1349	558	28	51
Bacteroidetes_Other	3.27011e-05	5.34681e-09	3.27011e-05	0.000752126	1.39819e-06	0.000528808	0.2786	0.684	0.193816	0.635566	5.28246e-05	0.000396184	2.96895e-06	5.56679e-06	0	0	1	0	0	1	17	5	0	0
Other_Other	0.00627861	1.43375e-05	0.00169337	0.0204709	0.00105045	0.0144945	0.5112	0.72	0.753298	0.822456	0.00775642	0.0387821	1.86769e-52	5.60308e-52	28	15	48	27	74	8	470	119	14	15
Deferribacteres_Deferribacteres	0.00268149	3.5952e-05	0.00268149	0.00029431	3.26156e-07	0.000255404	1	NA	0.79717	0.822456	0.114	0.378904	6.78938e-16	1.45487e-15	0	0	0	0	82	0	0	0	1	8
Proteobacteria_Deltaproteobacteria	0.000130804	8.5549e-08	0.000130804	0	0	0	1	NA	0.423711	0.635566	0.126301	0.378904	0.124988	0.156235	4	0	0	0	0	0	0	0	0	0
Actinobacteria_Actinobacteria	0.00209287	1.39552e-06	0.000528303	0.000784827	2.49162e-06	0.00070592	0.1702	0.684	0.0906884	0.571429	0.181983	0.40789	2.34175e-05	3.59829e-05	5	23	13	16	7	0	0	0	2	22
Firmicutes_Clostridia	0.0877371	0.00830257	0.0407494	0.0425441	0.00118207	0.0153757	0.3616	0.684	0.690476	0.822456	0.190349	0.40789	2.25836e-113	8.46884e-113	57	169	954	199	1304	29	567	298	307	100
Bacteroidetes_Sphingobacteria	9.81033e-05	4.81213e-08	9.81033e-05	0	0	0	1	NA	0.423711	0.635566	0.229508	0.430328	0.249988	0.288447	0	0	3	0	0	0	0	0	0	0
Firmicutes_Other	0.00552649	1.95078e-05	0.00197524	0.00323741	6.14082e-06	0.00110823	0.3674	0.684	0.345742	0.635566	0.2883	0.4805	2.39886e-05	3.59829e-05	7	27	40	18	77	7	34	37	17	4
Proteobacteria_Betaproteobacteria	0.069588	0.0152077	0.0551501	0.18535	0.0394633	0.0888406	0.1844	0.684	0.0952381	0.571429	0.379731	0.548026	0	0	41	9	1755	8	315	171	1850	2937	360	350
Firmicutes_Bacilli	0.766841	0.0650892	0.114096	0.599738	0.157939	0.17773	0.399	0.684	0.420635	0.635566	0.401886	0.548026	0	0	5855	5745	2221	5570	4059	5822	1387	692	4977	5462
Firmicutes_Erysipelotrichia	0.00029431	8.5549e-08	0.000130804	0.000163506	5.34681e-08	0.00010341	0.6	0.72	0.500844	0.693477	0.616104	0.77013	0.423896	0.454175	0	4	0	3	2	0	0	0	3	2
Verrucomicrobia_Verrucomicrobiae	0.0385546	0.00496373	0.0315079	0.0644212	0.0102117	0.0451923	0.5948	0.72	0.600402	0.771945	0.7007	0.8085	2.32992e-47	5.82479e-47	6	1	995	2	175	1	439	1452	41	37
Proteobacteria_Other	0.000130804	3.20809e-08	8.0101e-05	0.000196207	7.2182e-08	0.000120152	0.84	0.84	0.822456	0.822456	0.786011	0.842155	0.753886	0.753886	0	0	2	0	2	0	1	4	0	1
Proteobacteria_Gammaproteobacteria	0.0182472	0.000261253	0.00722846	0.0145847	0.000653239	0.0114301	0.7008	0.764509	0.420635	0.635566	0.896677	0.896677	0.000412053	0.00056189	107	116	54	271	10	2	1	14	365	64
Unclassified_Other_Other	0	0	0	3.27011e-05	5.34681e-09	3.27011e-05	1	NA	0.423711	0.635566	1	NA	1	NA	0	0	0	0	0	0	1	0	0	0
Proteobacteria_Alphaproteobacteria	0	0	0	3.27011e-05	5.34681e-09	3.27011e-05	1	NA	0.423711	0.635566	1	NA	1	NA	0	0	0	0	0	0	0	0	1	0
Verrucomicrobia_Other	3.27011e-05	5.34681e-09	3.27011e-05	0	0	0	1	NA	0.423711	0.635566	1	NA	1	NA	0	0	1	0	0	0	0	0	0	0
Bacteroidetes_Flavobacteria	0	0	0	0	0	0	1	NA	NA	NA	NA	NA	NA	NA	0	0	0	0	0	0	0	0	0	0
Type_c_otu_table_even6116.order	mean acute_uninfected (n=5)	var_grp1	stderr_grp1	mean acute_infected (n=5)	var_grp2	stderr_grp2	npdiff_p	npdiff_q	mannwhitney_p	mannwhitney_q	nbinom_p	nbinom_q	fishers_p	fishers_q	E0	E1	E2	E3	E4	G0	G1	G2	G3	G4
Proteobacteria_Gammaproteobacteria_Xanthomonadales	0.00261609	3.31636e-05	0.00257541	0	0	0	0.4426	0.693486	0.179712	0.68853	3.08721e-18	6.17442e-17	1.57095e-24	4.12374e-24	79	0	0	0	1	0	0	0	0	0
Bacteroidetes_Bacteroidia_Bacteroidales	0.00173316	3.00224e-06	0.000774885	0.067397	0.00862595	0.0415354	0.0202	0.3232	0.015873	0.412698	1.6834e-06	1.6834e-05	0	0	6	7	29	2	9	75	1349	558	28	51
Bacteroidetes_Other_Other	3.27011e-05	5.34681e-09	3.27011e-05	0.000752126	1.39819e-06	0.000528808	0.294	0.693486	0.193816	0.68853	5.28246e-05	0.000352164	2.96895e-06	6.2348e-06	0	0	1	0	0	1	17	5	0	0
Actinobacteria_Actinobacteria_Actinomycetales	0.000392413	1.41691e-07	0.000168339	3.27011e-05	5.34681e-09	3.27011e-05	0.0932	0.616533	0.0573469	0.619048	0.00618716	0.0309358	0.00341486	0.00551631	1	0	6	2	3	0	0	0	0	1
Other_Other_Other	0.00627861	1.43375e-05	0.00169337	0.0204709	0.00105045	0.0144945	0.5232	0.693486	0.753298	0.84127	0.00775642	0.0310257	1.86769e-52	6.53692e-52	28	15	48	27	74	8	470	119	14	15
Firmicutes_Bacilli_Bacillales	0.43656	0.0951437	0.137945	0.140942	0.0308454	0.0785435	0.1156	0.616533	0.150794	0.68853	0.0974318	0.315753	0	0	5228	2193	508	3891	1530	3	31	222	1850	2204
Deferribacteres_Deferribacteres_Deferribacterales	0.00268149	3.5952e-05	0.00268149	0.00029431	3.26156e-07	0.000255404	1	NA	0.79717	0.84127	0.114	0.315753	6.78938e-16	1.58419e-15	0	0	0	0	82	0	0	0	1	8
Proteobacteria_Deltaproteobacteria_Bdellovibrionales	0.000130804	8.5549e-08	0.000130804	0	0	0	1	NA	0.423711	0.68853	0.126301	0.315753	0.124988	0.187482	4	0	0	0	0	0	0	0	0	0
Firmicutes_Clostridia_Clostridiales	0.0876063	0.0082814	0.0406974	0.0425114	0.00118145	0.0153717	0.3614	0.693486	0.690476	0.816017	0.190979	0.424397	5.10067e-113	2.14228e-112	57	168	953	199	1302	29	567	298	306	100
Bacteroidetes_Sphingobacteria_Sphingobacteriales	9.81033e-05	4.81213e-08	9.81033e-05	0	0	0	1	NA	0.423711	0.68853	0.229508	0.459016	0.249988	0.349983	0	0	3	0	0	0	0	0	0	0
Firmicutes_Other_Other	0.00552649	1.95078e-05	0.00197524	0.00323741	6.14082e-06	0.00110823	0.3722	0.693486	0.345742	0.68853	0.2883	0.524181	2.39886e-05	4.57964e-05	7	27	40	18	77	7	34	37	17	4
Firmicutes_Clostridia_Other	0.000130804	1.87138e-08	6.11782e-05	3.27011e-05	5.34681e-09	3.27011e-05	0.4116	0.693486	0.231998	0.68853	0.375	0.542868	0.37498	0.46321	0	1	1	0	2	0	0	0	1	0
Firmicutes_Bacilli_Lactobacillales	0.329464	0.0318851	0.0798562	0.457979	0.112659	0.150106	0.507	0.693486	0.84127	0.84127	0.376017	0.542868	6.02593e-232	3.16361e-231	619	3548	1710	1672	2526	5804	1355	469	3122	3255
Proteobacteria_Betaproteobacteria_Burkholderiales	0.0695553	0.0152092	0.0551528	0.185284	0.0394666	0.0888443	0.1942	0.693486	0.0952381	0.619048	0.380007	0.542868	0	0	41	9	1755	8	314	170	1849	2937	360	350
Proteobacteria_Gammaproteobacteria_Other	0	0	0	6.54022e-05	2.13873e-08	6.54022e-05	1	NA	0.423711	0.68853	0.444444	0.592593	0.499992	0.552623	0	0	0	0	0	0	0	0	2	0
Actinobacteria_Actinobacteria_Bifidobacteriales	9.81033e-05	4.81213e-08	9.81033e-05	3.27011e-05	5.34681e-09	3.27011e-05	1	NA	1	NA	0.524575	0.62208	0.624988	0.656237	0	0	3	0	0	0	0	0	1	0
Actinobacteria_Actinobacteria_Coriobacteriales	0.00156965	1.90614e-06	0.000617436	0.000719424	2.30715e-06	0.000679286	0.4198	0.693486	0.086677	0.619048	0.528768	0.62208	0.00253332	0.00443331	4	23	4	13	4	0	0	0	1	21
Firmicutes_Erysipelotrichia_Erysipelotrichales	0.00029431	8.5549e-08	0.000130804	0.000163506	5.34681e-08	0.00010341	0.6068	0.693486	0.500844	0.743441	0.616104	0.68456	0.423896	0.494546	0	4	0	3	2	0	0	0	3	2
Verrucomicrobia_Verrucomicrobiae_Verrucomicrobiales	0.0385546	0.00496373	0.0315079	0.0644212	0.0102117	0.0451923	0.5958	0.693486	0.600402	0.743441	0.7007	0.737579	2.32992e-47	6.98975e-47	6	1	995	2	175	1	439	1452	41	37
Proteobacteria_Other_Other	0.000130804	3.20809e-08	8.0101e-05	0.000196207	7.2182e-08	0.000120152	0.8408	0.896853	0.822456	0.84127	0.786011	0.786011	0.753886	0.753886	0	0	2	0	2	0	1	4	0	1
Unclassified_Other_Other_Other	0	0	0	3.27011e-05	5.34681e-09	3.27011e-05	1	NA	0.423711	0.68853	1	NA	1	NA	0	0	0	0	0	0	1	0	0	0
Actinobacteria_Actinobacteria_Other	3.27011e-05	5.34681e-09	3.27011e-05	0	0	0	1	NA	0.423711	0.68853	1	NA	1	NA	0	0	0	1	0	0	0	0	0	0
Firmicutes_Bacilli_Other	0.000817528	1.47037e-07	0.000171486	0.000817528	9.08958e-07	0.00042637	1	NA	0.524518	0.743441	1	NA	1	NA	8	4	3	7	3	15	1	1	5	3
Proteobacteria_Alphaproteobacteria_Caulobacterales	0	0	0	3.27011e-05	5.34681e-09	3.27011e-05	1	NA	0.423711	0.68853	1	NA	1	NA	0	0	0	0	0	0	0	0	1	0
Proteobacteria_Betaproteobacteria_Other	3.27011e-05	5.34681e-09	3.27011e-05	6.54022e-05	8.02022e-09	4.00505e-05	1	NA	0.600471	0.743441	1	NA	1	NA	0	0	0	0	1	1	1	0	0	0
Proteobacteria_Gammaproteobacteria_Enterobacteriales	0.0156311	0.000300633	0.00775413	0.0145193	0.000645887	0.0113656	0.899	0.899	0.547619	0.743441	1	NA	0.27348	0.358943	28	116	54	271	9	2	1	14	363	64
Verrucomicrobia_Other_Other	3.27011e-05	5.34681e-09	3.27011e-05	0	0	0	1	NA	0.423711	0.68853	1	NA	1	NA	0	0	1	0	0	0	0	0	0	0
Bacteroidetes_Flavobacteria_Flavobacteriales	0	0	0	0	0	0	1	NA	NA	NA	NA	NA	NA	NA	0	0	0	0	0	0	0	0	0	0
Proteobacteria_Alphaproteobacteria_Rhizobiales	0	0	0	0	0	0	1	NA	NA	NA	NA	NA	NA	NA	0	0	0	0	0	0	0	0	0	0
Proteobacteria_Alphaproteobacteria_Sphingomonadales	0	0	0	0	0	0	1	NA	NA	NA	NA	NA	NA	NA	0	0	0	0	0	0	0	0	0	0
Proteobacteria_Deltaproteobacteria_Other	0	0	0	0	0	0	1	NA	NA	NA	NA	NA	NA	NA	0	0	0	0	0	0	0	0	0	0
Proteobacteria_Gammaproteobacteria_Aeromonadales	0	0	0	0	0	0	1	NA	NA	NA	NA	NA	NA	NA	0	0	0	0	0	0	0	0	0	0
Proteobacteria_Gammaproteobacteria_Alteromonadales	0	0	0	0	0	0	1	NA	NA	NA	NA	NA	NA	NA	0	0	0	0	0	0	0	0	0	0
Proteobacteria_Gammaproteobacteria_Pseudomonadales	0	0	0	0	0	0	1	NA	NA	NA	NA	NA	NA	NA	0	0	0	0	0	0	0	0	0	0
Type_c_otu_table_even6116.family	mean acute_uninfected (n=5)	var_grp1	stderr_grp1	mean acute_infected (n=5)	var_grp2	stderr_grp2	npdiff_p	npdiff_q	mannwhitney_p	mannwhitney_q	nbinom_p	nbinom_q	fishers_p	fishers_q	E0	E1	E2	E3	E4	G0	G1	G2	G3	G4
Firmicutes_Bacilli_Bacillales_Planococcaceae	0.0153041	0.000192894	0.00621119	3.27011e-05	5.34681e-09	3.27011e-05	0.0072	0.0638	0.00970079	0.121693	5.50156e-101	1.92554e-99	1.76294e-103	8.1536e-103	226	94	12	109	27	0	0	0	0	1
Firmicutes_Bacilli_Lactobacillales_Carnobacteriaceae	0.0101046	1.20089e-05	0.00154977	0	0	0	0.0086	0.0638	0.00749496	0.121693	5.71059e-73	9.99354e-72	4.49204e-69	1.66206e-68	83	76	38	72	40	0	0	0	0	0
Firmicutes_Bacilli_Lactobacillales_Aerococcaceae	0.00232178	1.24848e-06	0.000499696	0	0	0	0.0088	0.0638	0.00749496	0.121693	1.98253e-18	2.31295e-17	8.13269e-22	2.00606e-21	20	19	3	13	16	0	0	0	0	0
Proteobacteria_Gammaproteobacteria_Xanthomonadales_Xanthomonadaceae	0.00261609	3.31636e-05	0.00257541	0	0	0	0.4366	0.66004	0.179712	0.628732	3.08721e-18	2.70131e-17	1.57095e-24	4.15179e-24	79	0	0	0	1	0	0	0	0	0
Firmicutes_Bacilli_Bacillales_Other	0.0087639	6.24321e-05	0.00353361	0.000196207	4.54479e-08	9.53393e-05	0.0126	0.0671143	0.0156505	0.121693	1.06439e-11	7.45074e-11	2.96536e-56	9.9744e-56	121	56	3	76	12	0	0	1	3	2
Firmicutes_Bacilli_Bacillales_Bacillaceae	0.113015	0.0123352	0.0496694	0.000228908	1.28324e-07	0.000160202	0.006	0.0638	0.0111594	0.121693	3.48002e-07	1.84308e-06	0	0	1744	503	96	951	162	0	0	0	2	5
Proteobacteria_Betaproteobacteria_Burkholderiales_Comamonadaceae	0.000948332	4.49667e-06	0.000948332	0	0	0	1	NA	0.423711	0.628732	3.68616e-07	1.84308e-06	3.70063e-09	7.60685e-09	29	0	0	0	0	0	0	0	0	0
Bacteroidetes_Bacteroidia_Bacteroidales_Porphyromonadaceae	0.000719424	5.15968e-07	0.000321237	0.0184434	0.000743533	0.0121945	0.0162	0.0671143	0.015873	0.121693	4.91696e-06	2.15117e-05	3.41199e-138	1.80348e-137	3	4	12	1	2	20	405	95	7	37
Bacteroidetes_Other_Other_Other	3.27011e-05	5.34681e-09	3.27011e-05	0.000752126	1.39819e-06	0.000528808	0.2838	0.633092	0.193816	0.628732	5.28246e-05	0.000205429	2.96895e-06	5.49256e-06	0	0	1	0	0	1	17	5	0	0
Proteobacteria_Betaproteobacteria_Burkholderiales_Burkholderiaceae	0.0298888	0.00190787	0.0195339	0.000719424	8.6351e-07	0.000415574	0.306	0.633857	0.397615	0.628732	0.000130753	0.000457635	2.4833e-189	1.53137e-188	2	5	597	0	310	0	0	12	9	1
Bacteroidetes_Bacteroidia_Bacteroidales_Other	0.000784827	1.26185e-06	0.000502364	0.047809	0.00435036	0.029497	0.0146	0.0671143	0.0211767	0.139161	0.000231711	0.000737262	0	0	2	3	17	1	1	55	942	433	18	14
Proteobacteria_Betaproteobacteria_Burkholderiales_Oxalobacteraceae	0	0	0	0.000392413	7.69941e-07	0.000392413	1	NA	0.423711	0.628732	0.00186378	0.00543604	0.000487755	0.000751955	0	0	0	0	0	0	0	0	0	12
Actinobacteria_Actinobacteria_Actinomycetales_Microbacteriaceae	0.000359712	1.65751e-07	0.000182072	0	0	0	0.1598	0.548422	0.0720057	0.368029	0.00216136	0.00581905	0.000975685	0.00138847	0	0	6	2	3	0	0	0	0	0
Other_Other_Other_Other	0.00627861	1.43375e-05	0.00169337	0.0204709	0.00105045	0.0144945	0.5058	0.698486	0.753298	0.859965	0.00775642	0.019391	1.86769e-52	5.75872e-52	28	15	48	27	74	8	470	119	14	15
Firmicutes_Clostridia_Clostridiales_Lachnospiraceae	0.00415304	2.09542e-05	0.00204715	0.00101373	1.02124e-06	0.000451938	0.2406	0.633092	0.243321	0.628732	0.0350737	0.0818386	3.80254e-14	8.27612e-14	8	40	8	3	68	4	16	0	3	8
Deferribacteres_Deferribacteres_Deferribacterales_Deferribacteraceae	0.00268149	3.5952e-05	0.00268149	0.00029431	3.26156e-07	0.000255404	1	NA	0.79717	0.859965	0.114	0.249376	6.78938e-16	1.57005e-15	0	0	0	0	82	0	0	0	1	8
Proteobacteria_Deltaproteobacteria_Bdellovibrionales_Bacteriovoracaceae	0.000130804	8.5549e-08	0.000130804	0	0	0	1	NA	0.423711	0.628732	0.126301	0.260032	0.124988	0.159467	4	0	0	0	0	0	0	0	0	0
Firmicutes_Clostridia_Clostridiales_Ruminococcaceae	0.00856769	4.35979e-05	0.00295289	0.00477436	8.78749e-06	0.00132571	0.2828	0.633092	0.294802	0.628732	0.167044	0.324808	1.11372e-08	2.16881e-08	22	68	10	50	112	18	49	16	14	49
Firmicutes_Clostridia_Clostridiales_Eubacteriaceae	0.000654022	4.41112e-07	0.000297023	0.00163506	9.14305e-06	0.00135226	0.8698	0.902521	1	NA	0.188354	0.346611	0.000437042	0.000703068	0	6	1	3	10	1	43	3	0	3
Firmicutes_Clostridia_Clostridiales_Clostridiaceae	0.0686069	0.00634148	0.0356131	0.0313931	0.000783963	0.0125217	0.3766	0.66004	0.690476	0.814408	0.200429	0.346611	8.837e-99	3.63299e-98	23	46	923	127	979	3	398	266	268	25
Firmicutes_Bacilli_Bacillales_Staphylococcaceae	0.299477	0.0330998	0.0813631	0.140484	0.0306448	0.0782877	0.202	0.5858	0.222222	0.628732	0.208021	0.346611	0	0	3137	1540	397	2755	1329	3	31	221	1845	2196
Bacteroidetes_Bacteroidia_Bacteroidales_Bacteroidaceae	0.000228908	1.81792e-07	0.000190679	0.00114454	4.46459e-06	0.000944943	0.5668	0.73515	0.503812	0.702284	0.21787	0.346611	1.50027e-05	2.64332e-05	1	0	0	0	6	0	2	30	3	0
Proteobacteria_Betaproteobacteria_Burkholderiales_Sutterellaceae	0.0387181	0.0070898	0.0376558	0.18414	0.0393834	0.0887507	0.1702	0.548422	0.0593271	0.341131	0.258532	0.393418	0	0	10	4	1158	8	4	170	1849	2924	351	337
Firmicutes_Other_Other_Other	0.00552649	1.95078e-05	0.00197524	0.00323741	6.14082e-06	0.00110823	0.3678	0.66004	0.345742	0.628732	0.2883	0.420437	2.39886e-05	4.03444e-05	7	27	40	18	77	7	34	37	17	4
Firmicutes_Bacilli_Lactobacillales_Lactobacillaceae	0.315468	0.0321339	0.0801672	0.45605	0.112271	0.149848	0.4552	0.66004	0.84127	0.859965	0.341427	0.477997	3.54511e-279	2.62338e-278	515	3449	1655	1562	2466	5797	1354	466	3085	3244
Firmicutes_Clostridia_Other_Other	0.000130804	1.87138e-08	6.11782e-05	3.27011e-05	5.34681e-09	3.27011e-05	0.4088	0.66004	0.231998	0.628732	0.375	0.504808	0.37498	0.447556	0	1	1	0	2	0	0	0	1	0
Bacteroidetes_Sphingobacteria_Sphingobacteriales_Sphingobacteriaceae	6.54022e-05	2.13873e-08	6.54022e-05	0	0	0	1	NA	0.423711	0.628732	0.444444	0.555556	0.499992	0.544109	0	0	2	0	0	0	0	0	0	0
Proteobacteria_Gammaproteobacteria_Other_Other	0	0	0	6.54022e-05	2.13873e-08	6.54022e-05	1	NA	0.423711	0.628732	0.444444	0.555556	0.499992	0.544109	0	0	0	0	0	0	0	0	2	0
Firmicutes_Clostridia_Clostridiales_Other	0.00562459	8.17341e-05	0.00404312	0.00369523	1.34419e-05	0.00163963	0.8714	0.902521	0.84127	0.859965	0.509833	0.596996	0.000573905	0.000849379	4	8	11	16	133	3	61	13	21	15
Actinobacteria_Actinobacteria_Bifidobacteriales_Bifidobacteriaceae	9.81033e-05	4.81213e-08	9.81033e-05	3.27011e-05	5.34681e-09	3.27011e-05	1	NA	1	NA	0.524575	0.596996	0.624988	0.642349	0	0	3	0	0	0	0	0	1	0
Actinobacteria_Actinobacteria_Coriobacteriales_Coriobacteriaceae	0.00156965	1.90614e-06	0.000617436	0.000719424	2.30715e-06	0.000679286	0.4268	0.66004	0.086677	0.398714	0.528768	0.596996	0.00253332	0.00347159	4	23	4	13	4	0	0	0	1	21
Firmicutes_Bacilli_Lactobacillales_Streptococcaceae	0.00058862	9.43713e-07	0.000434445	0.00107914	2.62796e-06	0.000724977	0.692	0.80272	0.913906	0.913906	0.613447	0.653443	0.0487803	0.0644597	0	0	3	14	1	0	1	0	23	9
Firmicutes_Erysipelotrichia_Erysipelotrichales_Erysipelotrichaceae	0.00029431	8.5549e-08	0.000130804	0.000163506	5.34681e-08	0.00010341	0.6084	0.73515	0.500844	0.702284	0.616104	0.653443	0.423896	0.49013	0	4	0	3	2	0	0	0	3	2
Verrucomicrobia_Verrucomicrobiae_Verrucomicrobiales_Verrucomicrobiaceae	0.0385546	0.00496373	0.0315079	0.0644212	0.0102117	0.0451923	0.5916	0.73515	0.600402	0.746532	0.7007	0.721309	2.32992e-47	6.6313e-47	6	1	995	2	175	1	439	1452	41	37
Proteobacteria_Other_Other_Other	0.000130804	3.20809e-08	8.0101e-05	0.000196207	7.2182e-08	0.000120152	0.8322	0.902521	0.822456	0.859965	0.786011	0.786011	0.753886	0.753886	0	0	2	0	2	0	1	4	0	1
Unclassified_Other_Other_Other_Other	0	0	0	3.27011e-05	5.34681e-09	3.27011e-05	1	NA	0.423711	0.628732	1	NA	1	NA	0	0	0	0	0	0	1	0	0	0
Actinobacteria_Actinobacteria_Other_Other	3.27011e-05	5.34681e-09	3.27011e-05	0	0	0	1	NA	0.423711	0.628732	1	NA	1	NA	0	0	0	1	0	0	0	0	0	0
Actinobacteria_Actinobacteria_Actinomycetales_Nocardiaceae	0	0	0	3.27011e-05	5.34681e-09	3.27011e-05	1	NA	0.423711	0.628732	1	NA	1	NA	0	0	0	0	0	0	0	0	0	1
Actinobacteria_Actinobacteria_Actinomycetales_Propionibacteriaceae	3.27011e-05	5.34681e-09	3.27011e-05	0	0	0	1	NA	0.423711	0.628732	1	NA	1	NA	1	0	0	0	0	0	0	0	0	0
Bacteroidetes_Sphingobacteria_Sphingobacteriales_Chitinophagaceae	3.27011e-05	5.34681e-09	3.27011e-05	0	0	0	1	NA	0.423711	0.628732	1	NA	1	NA	0	0	1	0	0	0	0	0	0	0
Firmicutes_Bacilli_Other_Other	0.000817528	1.47037e-07	0.000171486	0.000817528	9.08958e-07	0.00042637	1	NA	0.524518	0.709642	1	NA	1	NA	8	4	3	7	3	15	1	1	5	3
Firmicutes_Bacilli_Lactobacillales_Other	0.000425114	3.47543e-08	8.33718e-05	0.000425114	1.95159e-07	0.000197565	1	NA	0.670402	0.811539	1	NA	1	NA	1	4	3	2	3	7	0	3	1	2
Firmicutes_Bacilli_Lactobacillales_Enterococcaceae	0.000555919	5.82803e-07	0.00034141	0.000425114	9.03611e-07	0.000425114	1	NA	0.79717	0.859965	1	NA	0.584572	0.617976	0	0	8	9	0	0	0	0	13	0
Proteobacteria_Alphaproteobacteria_Caulobacterales_Caulobacteraceae	0	0	0	3.27011e-05	5.34681e-09	3.27011e-05	1	NA	0.423711	0.628732	1	NA	1	NA	0	0	0	0	0	0	0	0	1	0
Proteobacteria_Betaproteobacteria_Other_Other	3.27011e-05	5.34681e-09	3.27011e-05	6.54022e-05	8.02022e-09	4.00505e-05	1	NA	0.600471	0.746532	1	NA	1	NA	0	0	0	0	1	1	1	0	0	0
Proteobacteria_Betaproteobacteria_Burkholderiales_Other	0	0	0	3.27011e-05	5.34681e-09	3.27011e-05	1	NA	0.423711	0.628732	1	NA	1	NA	0	0	0	0	0	0	0	1	0	0
Proteobacteria_Gammaproteobacteria_Enterobacteriales_Enterobacteriaceae	0.0156311	0.000300633	0.00775413	0.0145193	0.000645887	0.0113656	0.9042	0.9042	0.547619	0.719728	1	NA	0.27348	0.337292	28	116	54	271	9	2	1	14	363	64
Verrucomicrobia_Other_Other_Other	3.27011e-05	5.34681e-09	3.27011e-05	0	0	0	1	NA	0.423711	0.628732	1	NA	1	NA	0	0	1	0	0	0	0	0	0	0
Bacteroidetes_Flavobacteria_Flavobacteriales_Flavobacteriaceae	0	0	0	0	0	0	1	NA	NA	NA	NA	NA	NA	NA	0	0	0	0	0	0	0	0	0	0
Proteobacteria_Alphaproteobacteria_Rhizobiales_Other	0	0	0	0	0	0	1	NA	NA	NA	NA	NA	NA	NA	0	0	0	0	0	0	0	0	0	0
Proteobacteria_Alphaproteobacteria_Rhizobiales_Hyphomicrobiaceae	0	0	0	0	0	0	1	NA	NA	NA	NA	NA	NA	NA	0	0	0	0	0	0	0	0	0	0
Proteobacteria_Alphaproteobacteria_Sphingomonadales_Sphingomonadaceae	0	0	0	0	0	0	1	NA	NA	NA	NA	NA	NA	NA	0	0	0	0	0	0	0	0	0	0
Proteobacteria_Betaproteobacteria_Burkholderiales_Burkholderiales_incertae_sedis	0	0	0	0	0	0	1	NA	NA	NA	NA	NA	NA	NA	0	0	0	0	0	0	0	0	0	0
Proteobacteria_Deltaproteobacteria_Other_Other	0	0	0	0	0	0	1	NA	NA	NA	NA	NA	NA	NA	0	0	0	0	0	0	0	0	0	0
Proteobacteria_Gammaproteobacteria_Aeromonadales_Aeromonadaceae	0	0	0	0	0	0	1	NA	NA	NA	NA	NA	NA	NA	0	0	0	0	0	0	0	0	0	0
Proteobacteria_Gammaproteobacteria_Alteromonadales_Shewanellaceae	0	0	0	0	0	0	1	NA	NA	NA	NA	NA	NA	NA	0	0	0	0	0	0	0	0	0	0
Proteobacteria_Gammaproteobacteria_Pseudomonadales_Moraxellaceae	0	0	0	0	0	0	1	NA	NA	NA	NA	NA	NA	NA	0	0	0	0	0	0	0	0	0	0
Proteobacteria_Gammaproteobacteria_Pseudomonadales_Pseudomonadaceae	0	0	0	0	0	0	1	NA	NA	NA	NA	NA	NA	NA	0	0	0	0	0	0	0	0	0	0
Type_c_otu_table_even6116.genus	mean acute_uninfected (n=5)	var_grp1	stderr_grp1	mean acute_infected (n=5)	var_grp2	stderr_grp2	npdiff_p	npdiff_q	mannwhitney_p	mannwhitney_q	nbinom_p	nbinom_q	fishers_p	fishers_q	E0	E1	E2	E3	E4	G0	G1	G2	G3	G4
Firmicutes_Bacilli_Bacillales_Planococcaceae_Sporosarcina	0.0147155	0.00017333	0.00588779	3.27011e-05	5.34681e-09	3.27011e-05	0.007	0.0902	0.00970079	0.19059	4.07762e-97	2.32424e-95	1.66892e-99	1.16824e-98	215	90	12	106	27	0	0	0	0	1
Firmicutes_Bacilli_Lactobacillales_Carnobacteriaceae_Atopostipes	0.0101046	1.20089e-05	0.00154977	0	0	0	0.0088	0.0902	0.00749496	0.19059	5.71059e-73	1.62752e-71	4.49204e-69	2.51554e-68	83	76	38	72	40	0	0	0	0	0
Firmicutes_Bacilli_Lactobacillales_Aerococcaceae_Aerococcus	0.00232178	1.24848e-06	0.000499696	0	0	0	0.0088	0.0902	0.00749496	0.19059	1.98253e-18	3.76681e-17	8.13269e-22	3.0362e-21	20	19	3	13	16	0	0	0	0	0
Proteobacteria_Gammaproteobacteria_Xanthomonadales_Xanthomonadaceae_Stenotrophomonas	0.00255069	3.15008e-05	0.00251001	0	0	0	0.4394	0.639034	0.179712	0.575607	8.38949e-18	1.1955e-16	6.29998e-24	2.51999e-23	77	0	0	0	1	0	0	0	0	0
Bacteroidetes_Bacteroidia_Bacteroidales_Porphyromonadaceae_Barnesiella	0.000130804	1.87138e-08	6.11782e-05	0.00277959	1.42092e-05	0.00168577	0.0204	0.10455	0.0192436	0.19059	4.48105e-15	5.10839e-14	7.84145e-21	2.74451e-20	1	1	2	0	0	2	55	23	2	3
Firmicutes_Bacilli_Bacillales_Other_Other	0.0087639	6.24321e-05	0.00353361	0.000196207	4.54479e-08	9.53393e-05	0.0174	0.101914	0.0156505	0.19059	1.06439e-11	1.01117e-10	2.96536e-56	1.50964e-55	121	56	3	76	12	0	0	1	3	2
Proteobacteria_Betaproteobacteria_Burkholderiales_Burkholderiaceae_Ralstonia	0.0295618	0.0018605	0.0192899	0.000327011	1.47037e-07	0.000171486	0.1942	0.5781	0.243321	0.575607	3.95918e-08	3.2239e-07	1.24841e-194	1.16518e-193	2	5	589	0	308	0	0	5	4	1
Firmicutes_Bacilli_Bacillales_Staphylococcaceae_Jeotgalicoccus	0.00088293	4.62499e-07	0.000304138	0	0	0	0.0454	0.206822	0.0248084	0.198467	2.15945e-07	1.53861e-06	1.48159e-08	4.14844e-08	9	9	0	2	7	0	0	0	0	0
Firmicutes_Bacilli_Bacillales_Bacillaceae_Other	0.112982	0.0123212	0.049641	0.000228908	1.28324e-07	0.000160202	0.006	0.0902	0.0111594	0.19059	3.48045e-07	2.10111e-06	0	0	1743	503	96	951	162	0	0	0	2	5
Proteobacteria_Betaproteobacteria_Burkholderiales_Comamonadaceae_Delftia	0.000948332	4.49667e-06	0.000948332	0	0	0	1	NA	0.423711	0.575607	3.68616e-07	2.10111e-06	3.70063e-09	1.09071e-08	29	0	0	0	0	0	0	0	0	0
Bacteroidetes_Bacteroidia_Bacteroidales_Porphyromonadaceae_Other	0.00058862	3.55563e-07	0.000266669	0.0156311	0.000557066	0.0105552	0.017	0.101914	0.0211767	0.19059	3.67079e-06	1.90213e-05	6.72362e-118	5.3789e-117	2	3	10	1	2	18	350	71	5	34
Bacteroidetes_Other_Other_Other_Other	3.27011e-05	5.34681e-09	3.27011e-05	0.000752126	1.39819e-06	0.000528808	0.2874	0.639034	0.193816	0.575607	5.28246e-05	0.000250917	2.96895e-06	7.22875e-06	0	0	1	0	0	1	17	5	0	0
Firmicutes_Bacilli_Bacillales_Planococcaceae_Other	0.00058862	5.42702e-07	0.000329455	0	0	0	0.1734	0.5781	0.0720057	0.432034	6.13553e-05	0.00026902	7.61033e-06	1.77574e-05	11	4	0	3	0	0	0	0	0	0
Bacteroidetes_Bacteroidia_Bacteroidales_Other_Other	0.000784827	1.26185e-06	0.000502364	0.047809	0.00435036	0.029497	0.015	0.101914	0.0211767	0.19059	0.000231711	0.000943394	0	0	2	3	17	1	1	55	942	433	18	14
Firmicutes_Clostridia_Clostridiales_Lachnospiraceae_Other	0.00245258	7.04443e-06	0.00118696	0.000523218	1.52384e-07	0.000174576	0.2458	0.629862	0.345742	0.575607	0.00100441	0.00381674	2.57783e-10	8.01992e-10	4	29	5	1	36	3	5	0	2	6
Actinobacteria_Actinobacteria_Actinomycetales_Microbacteriaceae_Microbacterium	0.000359712	1.65751e-07	0.000182072	0	0	0	0.1764	0.5781	0.0720057	0.432034	0.00216136	0.00769985	0.000975685	0.00188408	0	0	6	2	3	0	0	0	0	0
Proteobacteria_Gammaproteobacteria_Enterobacteriales_Enterobacteriaceae_Proteus	0.00088293	2.48627e-07	0.000222992	0.0028123	3.7286e-05	0.00273079	1	NA	0.141238	0.575607	0.00262258	0.00879337	2.27501e-08	6.06668e-08	5	8	9	2	3	1	0	1	84	0
Proteobacteria_Betaproteobacteria_Burkholderiales_Oxalobacteraceae_Herbaspirillum	0	0	0	0.000327011	5.34681e-07	0.000327011	1	NA	0.423711	0.575607	0.0051621	0.016241	0.00195169	0.00352563	0	0	0	0	0	0	0	0	0	10
Firmicutes_Clostridia_Clostridiales_Lachnospiraceae_Anaerostipes	0.000654022	4.67846e-07	0.000305891	0.000130804	1.87138e-08	6.11782e-05	0.2408	0.629862	0.237369	0.575607	0.00541367	0.016241	0.00154077	0.00287611	1	8	0	2	9	1	1	0	0	2
Other_Other_Other_Other_Other	0.00627861	1.43375e-05	0.00169337	0.0204709	0.00105045	0.0144945	0.5112	0.688288	0.753298	0.834422	0.00775642	0.0221058	1.86769e-52	8.7159e-52	28	15	48	27	74	8	470	119	14	15
Proteobacteria_Betaproteobacteria_Burkholderiales_Burkholderiaceae_Other	0.000228908	1.28324e-07	0.000160202	0	0	0	0.452	0.639034	0.179712	0.575607	0.0234515	0.063654	0.0156196	0.0249914	0	0	5	0	2	0	0	0	0	0
Proteobacteria_Gammaproteobacteria_Enterobacteriales_Enterobacteriaceae_Klebsiella	0.000196207	1.92485e-07	0.000196207	0	0	0	1	NA	0.423711	0.575607	0.0416573	0.10793	0.0312423	0.0485992	0	0	6	0	0	0	0	0	0	0
Firmicutes_Clostridia_Clostridiales_Ruminococcaceae_Other	0.000228908	1.81792e-07	0.000190679	3.27011e-05	5.34681e-09	3.27011e-05	0.727	0.785474	0.518605	0.657458	0.0893263	0.221374	0.0702946	0.100936	0	0	0	1	6	0	0	1	0	0
Deferribacteres_Deferribacteres_Deferribacterales_Deferribacteraceae_Mucispirillum	0.00268149	3.5952e-05	0.00268149	0.00029431	3.26156e-07	0.000255404	1	NA	0.79717	0.85666	0.114	0.270751	6.78938e-16	2.2365e-15	0	0	0	0	82	0	0	0	1	8
Proteobacteria_Deltaproteobacteria_Bdellovibrionales_Bacteriovoracaceae_Peredibacter	0.000130804	8.5549e-08	0.000130804	0	0	0	1	NA	0.423711	0.575607	0.126301	0.287967	0.124988	0.174983	4	0	0	0	0	0	0	0	0	0
Firmicutes_Clostridia_Clostridiales_Eubacteriaceae_Eubacterium	0.000654022	4.41112e-07	0.000297023	0.00163506	9.14305e-06	0.00135226	0.8782	0.8782	1	NA	0.188354	0.408811	0.000437042	0.000906458	0	6	1	3	10	1	43	3	0	3
Firmicutes_Clostridia_Clostridiales_Clostridiaceae_Clostridium	0.0684761	0.00633649	0.0355991	0.0313277	0.00078345	0.0125176	0.377	0.639034	0.690476	0.776786	0.201083	0.408811	1.27931e-98	7.96014e-98	22	46	922	126	978	3	397	266	268	24
Firmicutes_Clostridia_Clostridiales_Ruminococcaceae_Ruminococcus	0.00804447	3.28481e-05	0.00256313	0.00467626	9.36494e-06	0.00136857	0.284	0.639034	0.397615	0.575607	0.21025	0.408811	2.12415e-07	5.40694e-07	22	68	10	49	97	18	49	13	14	49
Firmicutes_Bacilli_Bacillales_Staphylococcaceae_Staphylococcus	0.298561	0.0330046	0.081246	0.140484	0.0306448	0.0782877	0.1974	0.5781	0.222222	0.575607	0.210376	0.408811	0	0	3128	1530	397	2753	1322	3	31	221	1845	2196
Bacteroidetes_Bacteroidia_Bacteroidales_Bacteroidaceae_Bacteroides	0.000228908	1.81792e-07	0.000190679	0.00114454	4.46459e-06	0.000944943	0.5676	0.7052	0.503812	0.657458	0.21787	0.408811	1.50027e-05	3.36059e-05	1	0	0	0	6	0	2	30	3	0
Firmicutes_Clostridia_Clostridiales_Ruminococcaceae_Flavonifractor	9.81033e-05	4.81213e-08	9.81033e-05	0	0	0	1	NA	0.423711	0.575607	0.229508	0.408811	0.249988	0.333317	0	0	0	0	3	0	0	0	0	0
Firmicutes_Clostridia_Clostridiales_Ruminococcaceae_Oscillibacter	9.81033e-05	4.81213e-08	9.81033e-05	0	0	0	1	NA	0.423711	0.575607	0.229508	0.408811	0.249988	0.333317	0	0	0	0	3	0	0	0	0	0
Proteobacteria_Betaproteobacteria_Burkholderiales_Sutterellaceae_Parasutterella	0.0387181	0.0070898	0.0376558	0.184107	0.0393737	0.0887398	0.1818	0.5781	0.0593271	0.427155	0.258597	0.446668	0	0	10	4	1158	8	4	170	1848	2924	351	337
Firmicutes_Other_Other_Other_Other	0.00552649	1.95078e-05	0.00197524	0.00323741	6.14082e-06	0.00110823	0.3766	0.639034	0.345742	0.575607	0.2883	0.483326	2.39886e-05	5.16677e-05	7	27	40	18	77	7	34	37	17	4
Firmicutes_Bacilli_Lactobacillales_Lactobacillaceae_Lactobacillus	0.31537	0.0321645	0.0802054	0.455984	0.112261	0.149841	0.447	0.639034	0.84127	0.865306	0.341515	0.556182	2.50526e-279	2.80589e-278	513	3449	1655	1562	2465	5797	1354	466	3084	3243
Firmicutes_Clostridia_Other_Other_Other	0.000130804	1.87138e-08	6.11782e-05	3.27011e-05	5.34681e-09	3.27011e-05	0.3954	0.639034	0.231998	0.575607	0.375	0.59375	0.37498	0.488345	0	1	1	0	2	0	0	0	1	0
Proteobacteria_Betaproteobacteria_Burkholderiales_Burkholderiaceae_Burkholderia	9.81033e-05	4.81213e-08	9.81033e-05	0.000392413	3.02095e-07	0.000245803	0.4396	0.639034	0.440686	0.587581	0.403941	0.617886	0.0351345	0.0531765	0	0	3	0	0	0	0	7	5	0
Bacteroidetes_Sphingobacteria_Sphingobacteriales_Sphingobacteriaceae_Sphingobacterium	6.54022e-05	2.13873e-08	6.54022e-05	0	0	0	1	NA	0.423711	0.575607	0.444444	0.617886	0.499992	0.559991	0	0	2	0	0	0	0	0	0	0
Proteobacteria_Betaproteobacteria_Burkholderiales_Oxalobacteraceae_Other	0	0	0	6.54022e-05	2.13873e-08	6.54022e-05	1	NA	0.423711	0.575607	0.444444	0.617886	0.499992	0.559991	0	0	0	0	0	0	0	0	0	2
Proteobacteria_Gammaproteobacteria_Other_Other_Other	0	0	0	6.54022e-05	2.13873e-08	6.54022e-05	1	NA	0.423711	0.575607	0.444444	0.617886	0.499992	0.559991	0	0	0	0	0	0	0	0	2	0
Proteobacteria_Gammaproteobacteria_Xanthomonadales_Xanthomonadaceae_Xanthomonas	6.54022e-05	2.13873e-08	6.54022e-05	0	0	0	1	NA	0.423711	0.575607	0.444444	0.617886	0.499992	0.559991	2	0	0	0	0	0	0	0	0	0
Firmicutes_Clostridia_Clostridiales_Lachnospiraceae_Robinsoniella	0.000817528	1.91149e-06	0.000618302	0.00029431	3.26156e-07	0.000255404	0.5372	0.688288	0.325789	0.575607	0.472944	0.63175	0.00902248	0.0148605	1	3	1	0	20	0	8	0	1	0
Actinobacteria_Actinobacteria_Coriobacteriales_Coriobacteriaceae_Enterorhabdus	6.54022e-05	8.02022e-09	4.00505e-05	0	0	0	0.4492	0.639034	0.177016	0.575607	0.5	0.63175	0.499992	0.559991	1	0	0	0	1	0	0	0	0	0
Firmicutes_Clostridia_Clostridiales_Lachnospiraceae_Shuttleworthia	6.54022e-05	8.02022e-09	4.00505e-05	0	0	0	0.4498	0.639034	0.177016	0.575607	0.5	0.63175	0.499992	0.559991	0	0	1	0	1	0	0	0	0	0
Proteobacteria_Gammaproteobacteria_Enterobacteriales_Enterobacteriaceae_Other	6.54022e-05	8.02022e-09	4.00505e-05	0	0	0	0.4286	0.639034	0.177016	0.575607	0.5	0.63175	0.499992	0.559991	0	0	1	1	0	0	0	0	0	0
Firmicutes_Clostridia_Clostridiales_Other_Other	0.00562459	8.17341e-05	0.00404312	0.00369523	1.34419e-05	0.00163963	0.8758	0.8782	0.84127	0.865306	0.509833	0.63175	0.000573905	0.00114781	4	8	11	16	133	3	61	13	21	15
Actinobacteria_Actinobacteria_Bifidobacteriales_Bifidobacteriaceae_Bifidobacterium	9.81033e-05	4.81213e-08	9.81033e-05	3.27011e-05	5.34681e-09	3.27011e-05	1	NA	1	NA	0.524575	0.636186	0.624988	0.660364	0	0	3	0	0	0	0	0	1	0
Actinobacteria_Actinobacteria_Coriobacteriales_Coriobacteriaceae_Other	0.00150425	2.06387e-06	0.000642475	0.000719424	2.30715e-06	0.000679286	0.422	0.639034	0.089686	0.496723	0.587564	0.697732	0.00487991	0.00828106	3	23	4	13	3	0	0	0	1	21
Firmicutes_Bacilli_Lactobacillales_Streptococcaceae_Streptococcus	0.00058862	9.43713e-07	0.000434445	0.00107914	2.62796e-06	0.000724977	0.6858	0.78105	0.913906	0.913906	0.613447	0.713602	0.0487803	0.0718868	0	0	3	14	1	0	1	0	23	9
Firmicutes_Clostridia_Clostridiales_Clostridiaceae_Other	0.000130804	5.34681e-09	3.27011e-05	6.54022e-05	8.02022e-09	4.00505e-05	0.526	0.688288	0.270344	0.575607	0.6875	0.783135	0.687485	0.699984	1	0	1	1	1	0	1	0	0	1
Verrucomicrobia_Verrucomicrobiae_Verrucomicrobiales_Verrucomicrobiaceae_Akkermansia	0.0385546	0.00496373	0.0315079	0.0644212	0.0102117	0.0451923	0.5926	0.714606	0.600402	0.697321	0.7007	0.783135	2.32992e-47	1.00366e-46	6	1	995	2	175	1	439	1452	41	37
Firmicutes_Erysipelotrichia_Erysipelotrichales_Erysipelotrichaceae_Turicibacter	0.000261609	8.82224e-08	0.000132833	0.000163506	5.34681e-08	0.00010341	0.6768	0.78105	0.57615	0.697321	0.732449	0.802877	0.581014	0.629539	0	4	0	3	1	0	0	0	3	2
Proteobacteria_Other_Other_Other_Other	0.000130804	3.20809e-08	8.0101e-05	0.000196207	7.2182e-08	0.000120152	0.8436	0.8782	0.822456	0.865306	0.786011	0.845333	0.753886	0.753886	0	0	2	0	2	0	1	4	0	1
Firmicutes_Clostridia_Clostridiales_Ruminococcaceae_Pseudoflavonifractor	6.54022e-05	2.13873e-08	6.54022e-05	3.27011e-05	5.34681e-09	3.27011e-05	1	NA	1	NA	0.855562	0.903094	1	NA	0	0	0	0	2	0	0	1	0	0
Firmicutes_Clostridia_Clostridiales_Lachnospiraceae_Marvinbryantia	0.000130804	3.20809e-08	8.0101e-05	6.54022e-05	2.13873e-08	6.54022e-05	1	NA	0.600471	0.697321	0.884774	0.911847	0.687485	0.699984	2	0	0	0	2	0	2	0	0	0
Proteobacteria_Gammaproteobacteria_Enterobacteriales_Enterobacteriaceae_Escherichia-Shigella	0.0144866	0.000309094	0.00786249	0.011707	0.000377453	0.00868853	0.728	0.785474	0.529619	0.657458	0.89585	0.911847	0.00281156	0.00492024	23	108	38	268	6	1	1	13	279	64
Firmicutes_Bacilli_Lactobacillales_Lactobacillaceae_Other	9.81033e-05	2.13873e-08	6.54022e-05	6.54022e-05	8.02022e-09	4.00505e-05	1	NA	0.904861	0.913906	0.953337	0.953337	1	NA	2	0	0	0	1	0	0	0	1	1
Unclassified_Other_Other_Other_Other_Other	0	0	0	3.27011e-05	5.34681e-09	3.27011e-05	1	NA	0.423711	0.575607	1	NA	1	NA	0	0	0	0	0	0	1	0	0	0
Actinobacteria_Actinobacteria_Other_Other_Other	3.27011e-05	5.34681e-09	3.27011e-05	0	0	0	1	NA	0.423711	0.575607	1	NA	1	NA	0	0	0	1	0	0	0	0	0	0
Actinobacteria_Actinobacteria_Actinomycetales_Nocardiaceae_Rhodococcus	0	0	0	3.27011e-05	5.34681e-09	3.27011e-05	1	NA	0.423711	0.575607	1	NA	1	NA	0	0	0	0	0	0	0	0	0	1
Actinobacteria_Actinobacteria_Actinomycetales_Propionibacteriaceae_Propionibacterium	3.27011e-05	5.34681e-09	3.27011e-05	0	0	0	1	NA	0.423711	0.575607	1	NA	1	NA	1	0	0	0	0	0	0	0	0	0
Bacteroidetes_Bacteroidia_Bacteroidales_Porphyromonadaceae_Parabacteroides	0	0	0	3.27011e-05	5.34681e-09	3.27011e-05	1	NA	0.423711	0.575607	1	NA	1	NA	0	0	0	0	0	0	0	1	0	0
Bacteroidetes_Sphingobacteria_Sphingobacteriales_Chitinophagaceae_Sediminibacterium	3.27011e-05	5.34681e-09	3.27011e-05	0	0	0	1	NA	0.423711	0.575607	1	NA	1	NA	0	0	1	0	0	0	0	0	0	0
Firmicutes_Bacilli_Other_Other_Other	0.000817528	1.47037e-07	0.000171486	0.000817528	9.08958e-07	0.00042637	1	NA	0.524518	0.657458	1	NA	1	NA	8	4	3	7	3	15	1	1	5	3
Firmicutes_Bacilli_Bacillales_Bacillaceae_Bacillus	3.27011e-05	5.34681e-09	3.27011e-05	0	0	0	1	NA	0.423711	0.575607	1	NA	1	NA	1	0	0	0	0	0	0	0	0	0
Firmicutes_Bacilli_Bacillales_Staphylococcaceae_Other	3.27011e-05	5.34681e-09	3.27011e-05	0	0	0	1	NA	0.423711	0.575607	1	NA	1	NA	0	1	0	0	0	0	0	0	0	0
Firmicutes_Bacilli_Lactobacillales_Other_Other	0.000425114	3.47543e-08	8.33718e-05	0.000425114	1.95159e-07	0.000197565	1	NA	0.670402	0.766174	1	NA	1	NA	1	4	3	2	3	7	0	3	1	2
Firmicutes_Bacilli_Lactobacillales_Enterococcaceae_Enterococcus	0.000555919	5.82803e-07	0.00034141	0.000425114	9.03611e-07	0.000425114	1	NA	0.79717	0.85666	1	NA	0.584572	0.629539	0	0	8	9	0	0	0	0	13	0
Firmicutes_Clostridia_Clostridiales_Lachnospiraceae_Dorea	3.27011e-05	5.34681e-09	3.27011e-05	0	0	0	1	NA	0.423711	0.575607	1	NA	1	NA	0	0	1	0	0	0	0	0	0	0
Firmicutes_Clostridia_Clostridiales_Ruminococcaceae_Anaerotruncus	3.27011e-05	5.34681e-09	3.27011e-05	3.27011e-05	5.34681e-09	3.27011e-05	1	NA	1	NA	1	NA	1	NA	0	0	0	0	1	0	0	1	0	0
Firmicutes_Erysipelotrichia_Erysipelotrichales_Erysipelotrichaceae_Coprobacillus	3.27011e-05	5.34681e-09	3.27011e-05	0	0	0	1	NA	0.423711	0.575607	1	NA	1	NA	0	0	0	0	1	0	0	0	0	0
Proteobacteria_Alphaproteobacteria_Caulobacterales_Caulobacteraceae_Brevundimonas	0	0	0	3.27011e-05	5.34681e-09	3.27011e-05	1	NA	0.423711	0.575607	1	NA	1	NA	0	0	0	0	0	0	0	0	1	0
Proteobacteria_Betaproteobacteria_Other_Other_Other	3.27011e-05	5.34681e-09	3.27011e-05	6.54022e-05	8.02022e-09	4.00505e-05	1	NA	0.600471	0.697321	1	NA	1	NA	0	0	0	0	1	1	1	0	0	0
Proteobacteria_Betaproteobacteria_Burkholderiales_Other_Other	0	0	0	3.27011e-05	5.34681e-09	3.27011e-05	1	NA	0.423711	0.575607	1	NA	1	NA	0	0	0	0	0	0	0	1	0	0
Proteobacteria_Betaproteobacteria_Burkholderiales_Sutterellaceae_Other	0	0	0	3.27011e-05	5.34681e-09	3.27011e-05	1	NA	0.423711	0.575607	1	NA	1	NA	0	0	0	0	0	0	1	0	0	0
Verrucomicrobia_Other_Other_Other_Other	3.27011e-05	5.34681e-09	3.27011e-05	0	0	0	1	NA	0.423711	0.575607	1	NA	1	NA	0	0	1	0	0	0	0	0	0	0
Bacteroidetes_Flavobacteria_Flavobacteriales_Flavobacteriaceae_Cloacibacterium	0	0	0	0	0	0	1	NA	NA	NA	NA	NA	NA	NA	0	0	0	0	0	0	0	0	0	0
Bacteroidetes_Flavobacteria_Flavobacteriales_Flavobacteriaceae_Flavobacterium	0	0	0	0	0	0	1	NA	NA	NA	NA	NA	NA	NA	0	0	0	0	0	0	0	0	0	0
Bacteroidetes_Sphingobacteria_Sphingobacteriales_Chitinophagaceae_Chitinophaga	0	0	0	0	0	0	1	NA	NA	NA	NA	NA	NA	NA	0	0	0	0	0	0	0	0	0	0
Firmicutes_Clostridia_Clostridiales_Eubacteriaceae_Anaerofustis	0	0	0	0	0	0	1	NA	NA	NA	NA	NA	NA	NA	0	0	0	0	0	0	0	0	0	0
Firmicutes_Clostridia_Clostridiales_Lachnospiraceae_Blautia	0	0	0	0	0	0	1	NA	NA	NA	NA	NA	NA	NA	0	0	0	0	0	0	0	0	0	0
Firmicutes_Clostridia_Clostridiales_Lachnospiraceae_Johnsonella	0	0	0	0	0	0	1	NA	NA	NA	NA	NA	NA	NA	0	0	0	0	0	0	0	0	0	0
Firmicutes_Clostridia_Clostridiales_Lachnospiraceae_Moryella	0	0	0	0	0	0	1	NA	NA	NA	NA	NA	NA	NA	0	0	0	0	0	0	0	0	0	0
Firmicutes_Erysipelotrichia_Erysipelotrichales_Erysipelotrichaceae_Other	0	0	0	0	0	0	1	NA	NA	NA	NA	NA	NA	NA	0	0	0	0	0	0	0	0	0	0
Proteobacteria_Alphaproteobacteria_Caulobacterales_Caulobacteraceae_Other	0	0	0	0	0	0	1	NA	NA	NA	NA	NA	NA	NA	0	0	0	0	0	0	0	0	0	0
Proteobacteria_Alphaproteobacteria_Rhizobiales_Other_Other	0	0	0	0	0	0	1	NA	NA	NA	NA	NA	NA	NA	0	0	0	0	0	0	0	0	0	0
Proteobacteria_Alphaproteobacteria_Rhizobiales_Hyphomicrobiaceae_Devosia	0	0	0	0	0	0	1	NA	NA	NA	NA	NA	NA	NA	0	0	0	0	0	0	0	0	0	0
Proteobacteria_Alphaproteobacteria_Sphingomonadales_Sphingomonadaceae_Other	0	0	0	0	0	0	1	NA	NA	NA	NA	NA	NA	NA	0	0	0	0	0	0	0	0	0	0
Proteobacteria_Betaproteobacteria_Burkholderiales_Burkholderiaceae_Cupriavidus	0	0	0	0	0	0	1	NA	NA	NA	NA	NA	NA	NA	0	0	0	0	0	0	0	0	0	0
Proteobacteria_Betaproteobacteria_Burkholderiales_Burkholderiales_incertae_sedis_Aquabacterium	0	0	0	0	0	0	1	NA	NA	NA	NA	NA	NA	NA	0	0	0	0	0	0	0	0	0	0
Proteobacteria_Betaproteobacteria_Burkholderiales_Comamonadaceae_Other	0	0	0	0	0	0	1	NA	NA	NA	NA	NA	NA	NA	0	0	0	0	0	0	0	0	0	0
Proteobacteria_Betaproteobacteria_Burkholderiales_Comamonadaceae_Acidovorax	0	0	0	0	0	0	1	NA	NA	NA	NA	NA	NA	NA	0	0	0	0	0	0	0	0	0	0
Proteobacteria_Betaproteobacteria_Burkholderiales_Comamonadaceae_Comamonas	0	0	0	0	0	0	1	NA	NA	NA	NA	NA	NA	NA	0	0	0	0	0	0	0	0	0	0
Proteobacteria_Betaproteobacteria_Burkholderiales_Oxalobacteraceae_Herminiimonas	0	0	0	0	0	0	1	NA	NA	NA	NA	NA	NA	NA	0	0	0	0	0	0	0	0	0	0
Proteobacteria_Betaproteobacteria_Burkholderiales_Oxalobacteraceae_Massilia	0	0	0	0	0	0	1	NA	NA	NA	NA	NA	NA	NA	0	0	0	0	0	0	0	0	0	0
Proteobacteria_Deltaproteobacteria_Other_Other_Other	0	0	0	0	0	0	1	NA	NA	NA	NA	NA	NA	NA	0	0	0	0	0	0	0	0	0	0
Proteobacteria_Gammaproteobacteria_Aeromonadales_Aeromonadaceae_Aeromonas	0	0	0	0	0	0	1	NA	NA	NA	NA	NA	NA	NA	0	0	0	0	0	0	0	0	0	0
Proteobacteria_Gammaproteobacteria_Alteromonadales_Shewanellaceae_Shewanella	0	0	0	0	0	0	1	NA	NA	NA	NA	NA	NA	NA	0	0	0	0	0	0	0	0	0	0
Proteobacteria_Gammaproteobacteria_Pseudomonadales_Moraxellaceae_Acinetobacter	0	0	0	0	0	0	1	NA	NA	NA	NA	NA	NA	NA	0	0	0	0	0	0	0	0	0	0
Proteobacteria_Gammaproteobacteria_Pseudomonadales_Pseudomonadaceae_Pseudomonas	0	0	0	0	0	0	1	NA	NA	NA	NA	NA	NA	NA	0	0	0	0	0	0	0	0	0	0
Type_c_otu_table_even6116.species	mean acute_uninfected (n=5)	var_grp1	stderr_grp1	mean acute_infected (n=5)	var_grp2	stderr_grp2	npdiff_p	npdiff_q	mannwhitney_p	mannwhitney_q	nbinom_p	nbinom_q	fishers_p	fishers_q	E0	E1	E2	E3	E4	G0	G1	G2	G3	G4
Proteobacteria_Betaproteobacteria_Burkholderiales_Burkholderiaceae_Ralstonia_Ralstonia_pickettii	0.012034	0.000395111	0.00888944	0	0	0	0.0456	0.28272	0.0253699	0.26131	7.03549e-81	5.7691e-79	4.57225e-82	4.01342e-81	2	5	283	0	78	0	0	0	0	0
Firmicutes_Bacilli_Lactobacillales_Carnobacteriaceae_Atopostipes_Atopostipes_suicloacalis	0.0101046	1.20089e-05	0.00154977	0	0	0	0.008	0.155	0.00749496	0.26131	5.71059e-73	2.34134e-71	4.49204e-69	3.2261e-68	83	76	38	72	40	0	0	0	0	0
Firmicutes_Bacilli_Bacillales_Planococcaceae_Sporosarcina_Sporosarcina_pasteurii	0.0110203	0.000100568	0.00448482	3.27011e-05	5.34681e-09	3.27011e-05	0.0096	0.155	0.00970079	0.26131	1.14011e-72	3.1163e-71	1.37888e-74	1.08931e-73	162	61	12	86	16	0	0	0	0	1
Proteobacteria_Gammaproteobacteria_Xanthomonadales_Xanthomonadaceae_Stenotrophomonas_Stenotrophomonas_maltophilia	0.00255069	3.15008e-05	0.00251001	0	0	0	0.444	0.656047	0.179712	0.57424	8.38949e-18	1.71985e-16	6.29998e-24	2.92764e-23	77	0	0	0	1	0	0	0	0	0
Firmicutes_Bacilli_Lactobacillales_Aerococcaceae_Aerococcus_Aerococcus_viridans	0.00219097	1.38482e-06	0.000526275	0	0	0	0.01	0.155	0.00749496	0.26131	3.81479e-17	6.25625e-16	1.30708e-20	5.73664e-20	20	19	2	12	14	0	0	0	0	0
Firmicutes_Bacilli_Bacillales_Planococcaceae_Sporosarcina_Sporosarcina_saromensis	0.00192937	2.18417e-06	0.000660935	0	0	0	0.0422	0.28272	0.0253699	0.26131	1.65814e-14	2.09058e-13	3.37364e-18	1.33259e-17	25	14	0	9	11	0	0	0	0	0
Bacteroidetes_Bacteroidia_Bacteroidales_Porphyromonadaceae_Barnesiella_Barnesiella_intestinihominis	0.000130804	1.87138e-08	6.11782e-05	0.00268149	1.34152e-05	0.001638	0.055	0.31	0.0432196	0.404692	1.78464e-14	2.09058e-13	5.4866e-20	2.28127e-19	1	1	2	0	0	1	53	23	2	3
Firmicutes_Bacilli_Bacillales_Planococcaceae_Sporosarcina_Other	0.00176586	3.65455e-06	0.000854932	0	0	0	0.1702	0.656047	0.0720057	0.463536	5.88481e-13	6.03193e-12	1.08453e-16	4.07988e-16	28	15	0	11	0	0	0	0	0	0
Firmicutes_Bacilli_Bacillales_Other_Other_Other	0.0087639	6.24321e-05	0.00353361	0.000196207	4.54479e-08	9.53393e-05	0.0152	0.175667	0.0156505	0.26131	1.06439e-11	9.69778e-11	2.96536e-56	1.9522e-55	121	56	3	76	12	0	0	1	3	2
Firmicutes_Bacilli_Lactobacillales_Lactobacillaceae_Lactobacillus_Lactobacillus_taiwanensis	3.27011e-05	5.34681e-09	3.27011e-05	0.00176586	1.42011e-05	0.0016853	0.455	0.656047	0.440686	0.581932	2.40345e-11	1.97083e-10	3.03926e-15	1.01926e-14	0	0	1	0	0	2	0	0	52	0
Firmicutes_Bacilli_Bacillales_Staphylococcaceae_Jeotgalicoccus_Jeotgalicoccus_halotolerans	0.00088293	4.62499e-07	0.000304138	0	0	0	0.0446	0.28272	0.0248084	0.26131	2.15945e-07	1.60977e-06	1.48159e-08	4.18019e-08	9	9	0	2	7	0	0	0	0	0
Firmicutes_Bacilli_Bacillales_Bacillaceae_Other_Other	0.112982	0.0123212	0.049641	0.000228908	1.28324e-07	0.000160202	0.0074	0.155	0.0111594	0.26131	3.48045e-07	2.32511e-06	0	0	1743	503	96	951	162	0	0	0	2	5
Proteobacteria_Betaproteobacteria_Burkholderiales_Comamonadaceae_Delftia_Delftia_tsuruhatensis	0.000948332	4.49667e-06	0.000948332	0	0	0	1	NA	0.423711	0.57424	3.68616e-07	2.32511e-06	3.70063e-09	1.12442e-08	29	0	0	0	0	0	0	0	0	0
Proteobacteria_Betaproteobacteria_Burkholderiales_Burkholderiaceae_Ralstonia_Ralstonia_insidiosa	0.0172989	0.000578905	0.0107602	0.000327011	1.47037e-07	0.000171486	0.4312	0.656047	1	NA	6.99583e-07	4.09756e-06	3.08765e-111	3.48464e-110	0	0	301	0	228	0	0	5	4	1
Bacteroidetes_Bacteroidia_Bacteroidales_Porphyromonadaceae_Other_Other	0.00058862	3.55563e-07	0.000266669	0.0156311	0.000557066	0.0105552	0.0202	0.178914	0.0211767	0.26131	3.67079e-06	2.0067e-05	6.72362e-118	8.85277e-117	2	3	10	1	2	18	350	71	5	34
Bacteroidetes_Other_Other_Other_Other_Other	3.27011e-05	5.34681e-09	3.27011e-05	0.000752126	1.39819e-06	0.000528808	0.292	0.656047	0.193816	0.57424	5.28246e-05	0.000270726	2.96895e-06	7.10749e-06	0	0	1	0	0	1	17	5	0	0
Firmicutes_Bacilli_Bacillales_Planococcaceae_Other_Other	0.00058862	5.42702e-07	0.000329455	0	0	0	0.1676	0.656047	0.0720057	0.463536	6.13553e-05	0.000295949	7.61033e-06	1.71776e-05	11	4	0	3	0	0	0	0	0	0
Bacteroidetes_Bacteroidia_Bacteroidales_Other_Other_Other	0.000784827	1.26185e-06	0.000502364	0.047809	0.00435036	0.029497	0.017	0.175667	0.0211767	0.26131	0.000231711	0.00105557	0	0	2	3	17	1	1	55	942	433	18	14
Firmicutes_Clostridia_Clostridiales_Lachnospiraceae_Other_Other	0.00245258	7.04443e-06	0.00118696	0.000523218	1.52384e-07	0.000174576	0.229	0.656047	0.345742	0.57424	0.00100441	0.0043348	2.57783e-10	8.14595e-10	4	29	5	1	36	3	5	0	2	6
Bacteroidetes_Bacteroidia_Bacteroidales_Bacteroidaceae_Bacteroides_Bacteroides_acidifaciens	9.81033e-05	2.13873e-08	6.54022e-05	0.00104644	4.31221e-06	0.000928677	0.5638	0.71338	0.724082	0.819565	0.00368593	0.0151123	4.14915e-07	1.05736e-06	1	0	0	0	2	0	0	29	3	0
Actinobacteria_Actinobacteria_Actinomycetales_Microbacteriaceae_Microbacterium_Microbacterium_flavescens	0.000327011	1.73771e-07	0.000186425	0	0	0	0.1636	0.656047	0.0720057	0.463536	0.00412866	0.0161214	0.00195169	0.00385458	0	0	6	1	3	0	0	0	0	0
Proteobacteria_Gammaproteobacteria_Enterobacteriales_Enterobacteriaceae_Proteus_Proteus_mirabilis	0.00088293	2.48627e-07	0.000222992	0.00264879	3.29551e-05	0.0025673	1	NA	0.141238	0.57424	0.00463639	0.0172811	1.86248e-07	4.90454e-07	5	8	9	2	3	1	0	1	79	0
Proteobacteria_Betaproteobacteria_Burkholderiales_Oxalobacteraceae_Herbaspirillum_Pseudoburkholderia_malthae	0	0	0	0.000327011	5.34681e-07	0.000327011	1	NA	0.423711	0.57424	0.0051621	0.018404	0.00195169	0.00385458	0	0	0	0	0	0	0	0	0	10
Other_Other_Other_Other_Other_Other	0.00627861	1.43375e-05	0.00169337	0.0204709	0.00105045	0.0144945	0.5174	0.687277	0.753298	0.834298	0.00775642	0.0265011	1.86769e-52	1.13498e-51	28	15	48	27	74	8	470	119	14	15
Firmicutes_Clostridia_Clostridiales_Lachnospiraceae_Anaerostipes_Other	0.000654022	4.67846e-07	0.000305891	9.81033e-05	2.13873e-08	6.54022e-05	0.1986	0.656047	0.158526	0.57424	0.0205491	0.0674009	0.000487177	0.00104019	1	8	0	2	9	1	0	0	0	2
Proteobacteria_Betaproteobacteria_Burkholderiales_Burkholderiaceae_Other_Other	0.000228908	1.28324e-07	0.000160202	0	0	0	0.4374	0.656047	0.179712	0.57424	0.0234515	0.0739623	0.0156196	0.0274211	0	0	5	0	2	0	0	0	0	0
Firmicutes_Clostridia_Clostridiales_Eubacteriaceae_Eubacterium_Eubacterium_dolichum	0.000130804	4.54479e-08	9.53393e-05	0.00130804	8.03359e-06	0.00126756	0.8882	0.8882	1	NA	0.0267394	0.0812084	1.68756e-08	4.59714e-08	0	3	0	0	1	0	39	1	0	0
Firmicutes_Bacilli_Lactobacillales_Lactobacillaceae_Lactobacillus_Lactobacillus_gasseri	0.000163506	5.34681e-08	0.00010341	0.00104644	2.53439e-06	0.000711954	0.437	0.656047	0.724082	0.819565	0.0372815	0.109182	7.38449e-06	1.71581e-05	0	0	2	0	3	10	0	0	22	0
Proteobacteria_Gammaproteobacteria_Enterobacteriales_Enterobacteriaceae_Klebsiella_Klebsiella_oxytoca	0.000196207	1.92485e-07	0.000196207	0	0	0	1	NA	0.423711	0.57424	0.0416573	0.11422	0.0312423	0.0525137	0	0	6	0	0	0	0	0	0	0
Proteobacteria_Betaproteobacteria_Burkholderiales_Burkholderiaceae_Ralstonia_Ralstonia_detusculanense	0.000196207	1.2565e-07	0.000158525	0	0	0	0.439	0.656047	0.179712	0.57424	0.0417879	0.11422	0.0312423	0.0525137	0	0	5	0	1	0	0	0	0	0
Proteobacteria_Gammaproteobacteria_Enterobacteriales_Enterobacteriaceae_Proteus_Other	0	0	0	0.000163506	1.3367e-07	0.000163506	1	NA	0.423711	0.57424	0.0718332	0.19001	0.0624898	0.0967979	0	0	0	0	0	0	0	0	5	0
Firmicutes_Clostridia_Clostridiales_Ruminococcaceae_Other_Other	0.000228908	1.81792e-07	0.000190679	3.27011e-05	5.34681e-09	3.27011e-05	0.7304	0.808657	0.518605	0.665254	0.0893263	0.228899	0.0702946	0.106794	0	0	0	1	6	0	0	1	0	0
Firmicutes_Bacilli_Lactobacillales_Lactobacillaceae_Lactobacillus_Lactobacillus_johnsonii	0.0524853	0.00497889	0.0315559	0.242479	0.157643	0.177563	0.3848	0.656047	0.84127	0.866508	0.105726	0.262713	0	0	1	28	677	4	895	5602	15	0	1789	9
Deferribacteres_Deferribacteres_Deferribacterales_Deferribacteraceae_Mucispirillum_Mucispirillum_schaedleri	0.00268149	3.5952e-05	0.00268149	0.00029431	3.26156e-07	0.000255404	1	NA	0.79717	0.855297	0.114	0.274942	6.78938e-16	2.43801e-15	0	0	0	0	82	0	0	0	1	8
Firmicutes_Bacilli_Lactobacillales_Aerococcaceae_Aerococcus_Aerococcus_urinaeequi	0.000130804	1.87138e-08	6.11782e-05	0	0	0	0.1654	0.656047	0.0707011	0.463536	0.125	0.287686	0.124988	0.179528	0	0	1	1	2	0	0	0	0	0
Proteobacteria_Deltaproteobacteria_Bdellovibrionales_Bacteriovoracaceae_Peredibacter_Peredibacter_starrii	0.000130804	8.5549e-08	0.000130804	0	0	0	1	NA	0.423711	0.57424	0.126301	0.287686	0.124988	0.179528	4	0	0	0	0	0	0	0	0	0
Firmicutes_Clostridia_Clostridiales_Ruminococcaceae_Ruminococcus_Ruminococcus_gnavus	0.00706344	2.85573e-05	0.00238987	0.00415304	5.52861e-06	0.00105153	0.3282	0.656047	0.420635	0.57424	0.175474	0.388888	1.88916e-06	4.66386e-06	17	59	8	43	89	18	42	13	14	40
Firmicutes_Clostridia_Clostridiales_Clostridiaceae_Clostridium_Other	0.0682799	0.00635213	0.035643	0.031295	0.00078071	0.0124957	0.381	0.656047	0.690476	0.79909	0.202031	0.430042	5.60044e-98	5.53044e-97	21	44	922	124	977	3	396	266	268	24
Firmicutes_Bacilli_Bacillales_Staphylococcaceae_Staphylococcus_Other	0.289339	0.030841	0.0785379	0.135252	0.028113	0.074984	0.205	0.656047	0.222222	0.57424	0.204532	0.430042	0	0	3007	1495	383	2687	1276	2	31	218	1815	2070
Firmicutes_Clostridia_Clostridiales_Ruminococcaceae_Flavonifractor_Flavonifractor_plautii	9.81033e-05	4.81213e-08	9.81033e-05	0	0	0	1	NA	0.423711	0.57424	0.229508	0.45602	0.249988	0.329151	0	0	0	0	3	0	0	0	0	0
Firmicutes_Clostridia_Clostridiales_Ruminococcaceae_Oscillibacter_Oscillibacter_valericigenes	9.81033e-05	4.81213e-08	9.81033e-05	0	0	0	1	NA	0.423711	0.57424	0.229508	0.45602	0.249988	0.329151	0	0	0	0	3	0	0	0	0	0
Proteobacteria_Betaproteobacteria_Burkholderiales_Burkholderiaceae_Burkholderia_Burkholderia_vietnamiensis	6.54022e-05	2.13873e-08	6.54022e-05	0.000392413	3.02095e-07	0.000245803	0.444	0.656047	0.440686	0.581932	0.233571	0.45602	0.0129296	0.0232146	0	0	2	0	0	0	0	7	5	0
Bacteroidetes_Bacteroidia_Bacteroidales_Porphyromonadaceae_Barnesiella_Other	0	0	0	9.81033e-05	2.13873e-08	6.54022e-05	0.4444	0.656047	0.179712	0.57424	0.248763	0.463604	0.249988	0.329151	0	0	0	0	0	1	2	0	0	0
Firmicutes_Clostridia_Clostridiales_Clostridiaceae_Clostridium_Clostridium_piliforme	9.81033e-05	2.13873e-08	6.54022e-05	0	0	0	0.4344	0.656047	0.179712	0.57424	0.248763	0.463604	0.249988	0.329151	0	0	0	2	1	0	0	0	0	0
Proteobacteria_Betaproteobacteria_Burkholderiales_Sutterellaceae_Parasutterella_Parasutterella_excrementihominis	0.0387181	0.0070898	0.0376558	0.184107	0.0393737	0.0887398	0.1752	0.656047	0.0593271	0.463536	0.258597	0.471222	0	0	10	4	1158	8	4	170	1848	2924	351	337
Firmicutes_Clostridia_Clostridiales_Ruminococcaceae_Ruminococcus_Ruminococcus_torques	0.000654022	1.60404e-07	0.000179111	0.00029431	1.65751e-07	0.000182072	0.2116	0.656047	0.133862	0.57424	0.280319	0.499699	0.0613673	0.0967979	2	5	1	5	7	0	5	0	0	4
Firmicutes_Other_Other_Other_Other_Other	0.00552649	1.95078e-05	0.00197524	0.00323741	6.14082e-06	0.00110823	0.3672	0.656047	0.345742	0.57424	0.2883	0.502991	2.39886e-05	5.26416e-05	7	27	40	18	77	7	34	37	17	4
Firmicutes_Bacilli_Lactobacillales_Lactobacillaceae_Lactobacillus_Lactobacillus_reuteri	0.0222368	0.000296254	0.00769745	0.0114454	0.00020755	0.00644282	0.3712	0.656047	0.150794	0.57424	0.35284	0.602768	4.70942e-25	2.32527e-24	37	312	86	141	104	20	30	31	42	227
Firmicutes_Clostridia_Other_Other_Other_Other	0.000130804	1.87138e-08	6.11782e-05	3.27011e-05	5.34681e-09	3.27011e-05	0.409	0.656047	0.231998	0.57424	0.375	0.627551	0.37498	0.485629	0	1	1	0	2	0	0	0	1	0
Firmicutes_Bacilli_Lactobacillales_Lactobacillaceae_Lactobacillus_Lactobacillus_intestinalis	0.0323741	0.000810002	0.0127279	0.0146828	0.000569401	0.0106715	0.3562	0.656047	0.0952381	0.544974	0.395266	0.648236	4.76649e-47	2.51035e-46	66	498	93	186	147	10	21	25	43	350
Bacteroidetes_Sphingobacteria_Sphingobacteriales_Sphingobacteriaceae_Sphingobacterium_Sphingobacterium_multivorum	6.54022e-05	2.13873e-08	6.54022e-05	0	0	0	1	NA	0.423711	0.57424	0.444444	0.656555	0.499992	0.556329	0	0	2	0	0	0	0	0	0	0
Firmicutes_Clostridia_Clostridiales_Eubacteriaceae_Eubacterium_Eubacterium_uniforme	6.54022e-05	2.13873e-08	6.54022e-05	0	0	0	1	NA	0.423711	0.57424	0.444444	0.656555	0.499992	0.556329	0	0	0	2	0	0	0	0	0	0
Proteobacteria_Betaproteobacteria_Burkholderiales_Oxalobacteraceae_Other_Other	0	0	0	6.54022e-05	2.13873e-08	6.54022e-05	1	NA	0.423711	0.57424	0.444444	0.656555	0.499992	0.556329	0	0	0	0	0	0	0	0	0	2
Proteobacteria_Gammaproteobacteria_Other_Other_Other_Other	0	0	0	6.54022e-05	2.13873e-08	6.54022e-05	1	NA	0.423711	0.57424	0.444444	0.656555	0.499992	0.556329	0	0	0	0	0	0	0	0	2	0
Proteobacteria_Gammaproteobacteria_Xanthomonadales_Xanthomonadaceae_Xanthomonas_Xanthomonas_retroflexus	6.54022e-05	2.13873e-08	6.54022e-05	0	0	0	1	NA	0.423711	0.57424	0.444444	0.656555	0.499992	0.556329	2	0	0	0	0	0	0	0	0	0
Firmicutes_Bacilli_Bacillales_Staphylococcaceae_Staphylococcus_Staphylococcus_cohnii	0.000981033	2.2724e-07	0.000213185	0.000654022	4.67846e-07	0.000305891	0.5052	0.687277	0.750335	0.834298	0.459481	0.656555	0.202454	0.285605	7	8	1	8	6	1	0	2	8	9
Firmicutes_Clostridia_Clostridiales_Lachnospiraceae_Robinsoniella_Robinsoniella_peoriensis	0.000817528	1.91149e-06	0.000618302	0.00029431	3.26156e-07	0.000255404	0.5482	0.708092	0.325789	0.57424	0.472944	0.656555	0.00902248	0.0165762	1	3	1	0	20	0	8	0	1	0
Firmicutes_Bacilli_Bacillales_Staphylococcaceae_Staphylococcus_Staphylococcus_lentus	0.00797907	3.53478e-05	0.00265886	0.00425114	6.06997e-05	0.00348424	0.4174	0.656047	0.20869	0.57424	0.489026	0.656555	4.5998e-09	1.34587e-08	107	27	13	57	40	0	0	1	19	110
Actinobacteria_Actinobacteria_Coriobacteriales_Coriobacteriaceae_Enterorhabdus_Enterorhabdus_caecimuris	6.54022e-05	8.02022e-09	4.00505e-05	0	0	0	0.4452	0.656047	0.177016	0.57424	0.5	0.656555	0.499992	0.556329	1	0	0	0	1	0	0	0	0	0
Firmicutes_Bacilli_Lactobacillales_Lactobacillaceae_Lactobacillus_Lactobacillus_apodemi	0	0	0	6.54022e-05	8.02022e-09	4.00505e-05	0.4488	0.656047	0.177016	0.57424	0.5	0.656555	0.499992	0.556329	0	0	0	0	0	0	1	1	0	0
Firmicutes_Clostridia_Clostridiales_Lachnospiraceae_Shuttleworthia_Shuttleworthia_satelles	6.54022e-05	8.02022e-09	4.00505e-05	0	0	0	0.4404	0.656047	0.177016	0.57424	0.5	0.656555	0.499992	0.556329	0	0	1	0	1	0	0	0	0	0
Proteobacteria_Gammaproteobacteria_Enterobacteriales_Enterobacteriaceae_Other_Other	6.54022e-05	8.02022e-09	4.00505e-05	0	0	0	0.4316	0.656047	0.177016	0.57424	0.5	0.656555	0.499992	0.556329	0	0	1	1	0	0	0	0	0	0
Firmicutes_Clostridia_Clostridiales_Other_Other_Other	0.00562459	8.17341e-05	0.00404312	0.00369523	1.34419e-05	0.00163963	0.8796	0.8882	0.84127	0.866508	0.509833	0.656555	0.000573905	0.00119312	4	8	11	16	133	3	61	13	21	15
Firmicutes_Bacilli_Lactobacillales_Lactobacillaceae_Lactobacillus_Lactobacillus_animalis	0.00111184	8.20736e-07	0.000405151	0.000686723	5.93496e-07	0.000344528	0.4792	0.675236	0.525809	0.665254	0.512433	0.656555	0.104634	0.155963	2	10	3	15	4	1	4	0	4	12
Actinobacteria_Actinobacteria_Bifidobacteriales_Bifidobacteriaceae_Bifidobacterium_Bifidobacterium_pseudolongum	9.81033e-05	4.81213e-08	9.81033e-05	3.27011e-05	5.34681e-09	3.27011e-05	1	NA	1	NA	0.524575	0.661771	0.624988	0.662558	0	0	3	0	0	0	0	0	1	0
Actinobacteria_Actinobacteria_Coriobacteriales_Coriobacteriaceae_Other_Other	0.00150425	2.06387e-06	0.000642475	0.000719424	2.30715e-06	0.000679286	0.4204	0.656047	0.089686	0.543392	0.587564	0.730004	0.00487991	0.00917888	3	23	4	13	3	0	0	0	1	21
Firmicutes_Bacilli_Lactobacillales_Streptococcaceae_Streptococcus_Other	0.00058862	9.43713e-07	0.000434445	0.00107914	2.62796e-06	0.000724977	0.6896	0.808657	0.913906	0.913906	0.613447	0.750786	0.0487803	0.0786458	0	0	3	14	1	0	1	0	23	9
Firmicutes_Bacilli_Lactobacillales_Lactobacillaceae_Lactobacillus_Other	0.00915631	2.52771e-05	0.00224842	0.0107914	4.57687e-05	0.00302552	0.6938	0.808657	0.84127	0.866508	0.6521	0.786356	0.0461607	0.0759729	18	99	43	48	72	95	27	15	100	93
Firmicutes_Clostridia_Clostridiales_Eubacteriaceae_Eubacterium_Eubacterium_hallii	0.000163506	8.02022e-08	0.000126651	6.54022e-05	2.13873e-08	6.54022e-05	0.721	0.808657	0.607236	0.718911	0.679666	0.805357	0.453098	0.556329	0	0	1	0	4	0	0	0	0	2
Firmicutes_Clostridia_Clostridiales_Clostridiaceae_Other_Other	0.000130804	5.34681e-09	3.27011e-05	6.54022e-05	8.02022e-09	4.00505e-05	0.521	0.687277	0.270344	0.57424	0.6875	0.805357	0.687485	0.705341	1	0	1	1	1	0	1	0	0	1
Verrucomicrobia_Verrucomicrobiae_Verrucomicrobiales_Verrucomicrobiaceae_Akkermansia_Akkermansia_muciniphila	0.0385546	0.00496373	0.0315079	0.0644212	0.0102117	0.0451923	0.5936	0.736064	0.600402	0.718911	0.7007	0.809259	2.32992e-47	1.31474e-46	6	1	995	2	175	1	439	1452	41	37
Firmicutes_Erysipelotrichia_Erysipelotrichales_Erysipelotrichaceae_Turicibacter_Turicibacter_sanguinis	0.000261609	8.82224e-08	0.000132833	0.000163506	5.34681e-08	0.00010341	0.6962	0.808657	0.57615	0.714981	0.732449	0.834178	0.581014	0.632619	0	4	0	3	1	0	0	0	3	2
Proteobacteria_Other_Other_Other_Other_Other	0.000130804	3.20809e-08	8.0101e-05	0.000196207	7.2182e-08	0.000120152	0.833	0.865107	0.822456	0.866508	0.786011	0.882917	0.753886	0.763551	0	0	2	0	2	0	1	4	0	1
Firmicutes_Bacilli_Lactobacillales_Lactobacillaceae_Lactobacillus_Lactobacillus_murinus	0.197809	0.0170936	0.0584697	0.172989	0.0248284	0.0704675	0.7732	0.826524	1	NA	0.824013	0.902406	3.0965e-15	1.01926e-14	389	2502	750	1168	1240	57	1256	394	1031	2552
Bacteroidetes_Bacteroidia_Bacteroidales_Bacteroidaceae_Bacteroides_Other	0.000130804	8.5549e-08	0.000130804	9.81033e-05	2.13873e-08	6.54022e-05	1	NA	0.79717	0.855297	0.825372	0.902406	1	NA	0	0	0	0	4	0	2	1	0	0
Firmicutes_Clostridia_Clostridiales_Ruminococcaceae_Ruminococcus_Other	0.000327011	5.34681e-08	0.00010341	0.000228908	1.28324e-07	0.000160202	0.749	0.814702	0.391668	0.57424	0.843116	0.909678	0.62901	0.662558	3	4	1	1	1	0	2	0	0	5
Firmicutes_Clostridia_Clostridiales_Ruminococcaceae_Pseudoflavonifractor_Pseudoflavonifractor_capillosus	6.54022e-05	2.13873e-08	6.54022e-05	3.27011e-05	5.34681e-09	3.27011e-05	1	NA	1	NA	0.855562	0.911118	1	NA	0	0	0	0	2	0	0	1	0	0
Firmicutes_Clostridia_Clostridiales_Lachnospiraceae_Marvinbryantia_Marvinbryantia_formatexigens	0.000130804	3.20809e-08	8.0101e-05	6.54022e-05	2.13873e-08	6.54022e-05	1	NA	0.600471	0.718911	0.884774	0.927762	0.687485	0.705341	2	0	0	0	2	0	2	0	0	0
Proteobacteria_Gammaproteobacteria_Enterobacteriales_Enterobacteriaceae_Escherichia-Shigella_Escherichia_coli	0.0143231	0.000301435	0.00776447	0.0115435	0.000367227	0.00857003	0.7228	0.808657	0.529619	0.665254	0.89382	0.927762	0.00264535	0.00509715	23	106	38	265	6	1	1	12	275	64
Firmicutes_Clostridia_Clostridiales_Eubacteriaceae_Eubacterium_Other	0.000261609	8.82224e-08	0.000132833	0.000228908	3.47543e-08	8.33718e-05	1	NA	1	NA	0.92556	0.948699	1	NA	0	3	0	1	4	1	3	2	0	1
Firmicutes_Bacilli_Bacillales_Staphylococcaceae_Staphylococcus_Staphylococcus_vitulinus	0.000228908	1.81792e-07	0.000190679	0.00029431	2.45953e-07	0.00022179	0.8372	0.865107	0.906329	0.913906	0.941725	0.953337	0.803594	0.803594	6	0	0	1	0	0	0	0	2	7
Firmicutes_Bacilli_Lactobacillales_Lactobacillaceae_Other_Other	9.81033e-05	2.13873e-08	6.54022e-05	6.54022e-05	8.02022e-09	4.00505e-05	1	NA	0.904861	0.913906	0.953337	0.953337	1	NA	2	0	0	0	1	0	0	0	1	1
Unclassified_Other_Other_Other_Other_Other_Other	0	0	0	3.27011e-05	5.34681e-09	3.27011e-05	1	NA	0.423711	0.57424	1	NA	1	NA	0	0	0	0	0	0	1	0	0	0
Actinobacteria_Actinobacteria_Other_Other_Other_Other	3.27011e-05	5.34681e-09	3.27011e-05	0	0	0	1	NA	0.423711	0.57424	1	NA	1	NA	0	0	0	1	0	0	0	0	0	0
Actinobacteria_Actinobacteria_Actinomycetales_Microbacteriaceae_Microbacterium_Other	3.27011e-05	5.34681e-09	3.27011e-05	0	0	0	1	NA	0.423711	0.57424	1	NA	1	NA	0	0	0	1	0	0	0	0	0	0
Actinobacteria_Actinobacteria_Actinomycetales_Nocardiaceae_Rhodococcus_Other	0	0	0	3.27011e-05	5.34681e-09	3.27011e-05	1	NA	0.423711	0.57424	1	NA	1	NA	0	0	0	0	0	0	0	0	0	1
Actinobacteria_Actinobacteria_Actinomycetales_Propionibacteriaceae_Propionibacterium_Propionibacterium_acnes	3.27011e-05	5.34681e-09	3.27011e-05	0	0	0	1	NA	0.423711	0.57424	1	NA	1	NA	1	0	0	0	0	0	0	0	0	0
Bacteroidetes_Bacteroidia_Bacteroidales_Porphyromonadaceae_Parabacteroides_Parabacteroides_goldsteinii	0	0	0	3.27011e-05	5.34681e-09	3.27011e-05	1	NA	0.423711	0.57424	1	NA	1	NA	0	0	0	0	0	0	0	1	0	0
Bacteroidetes_Sphingobacteria_Sphingobacteriales_Chitinophagaceae_Sediminibacterium_Sediminibacterium_salmoneum	3.27011e-05	5.34681e-09	3.27011e-05	0	0	0	1	NA	0.423711	0.57424	1	NA	1	NA	0	0	1	0	0	0	0	0	0	0
Firmicutes_Bacilli_Other_Other_Other_Other	0.000817528	1.47037e-07	0.000171486	0.000817528	9.08958e-07	0.00042637	1	NA	0.524518	0.665254	1	NA	1	NA	8	4	3	7	3	15	1	1	5	3
Firmicutes_Bacilli_Bacillales_Bacillaceae_Bacillus_Bacillus_selenitireducens	3.27011e-05	5.34681e-09	3.27011e-05	0	0	0	1	NA	0.423711	0.57424	1	NA	1	NA	1	0	0	0	0	0	0	0	0	0
Firmicutes_Bacilli_Bacillales_Staphylococcaceae_Other_Other	3.27011e-05	5.34681e-09	3.27011e-05	0	0	0	1	NA	0.423711	0.57424	1	NA	1	NA	0	1	0	0	0	0	0	0	0	0
Firmicutes_Bacilli_Bacillales_Staphylococcaceae_Staphylococcus_Staphylococcus_nepalensis	0	0	0	3.27011e-05	5.34681e-09	3.27011e-05	1	NA	0.423711	0.57424	1	NA	1	NA	0	0	0	0	0	0	0	0	1	0
Firmicutes_Bacilli_Bacillales_Staphylococcaceae_Staphylococcus_Staphylococcus_saprophyticus	3.27011e-05	5.34681e-09	3.27011e-05	0	0	0	1	NA	0.423711	0.57424	1	NA	1	NA	1	0	0	0	0	0	0	0	0	0
Firmicutes_Bacilli_Lactobacillales_Other_Other_Other	0.000425114	3.47543e-08	8.33718e-05	0.000425114	1.95159e-07	0.000197565	1	NA	0.670402	0.784675	1	NA	1	NA	1	4	3	2	3	7	0	3	1	2
Firmicutes_Bacilli_Lactobacillales_Enterococcaceae_Enterococcus_Enterococcus_faecalis	0.000555919	5.82803e-07	0.00034141	0.000425114	9.03611e-07	0.000425114	1	NA	0.79717	0.855297	1	NA	0.584572	0.632619	0	0	8	9	0	0	0	0	13	0
Firmicutes_Bacilli_Lactobacillales_Lactobacillaceae_Lactobacillus_Lactobacillus_iatae	0	0	0	3.27011e-05	5.34681e-09	3.27011e-05	1	NA	0.423711	0.57424	1	NA	1	NA	0	0	0	0	0	0	0	0	1	0
Firmicutes_Clostridia_Clostridiales_Clostridiaceae_Clostridium_Clostridium_bifermentans	3.27011e-05	5.34681e-09	3.27011e-05	0	0	0	1	NA	0.423711	0.57424	1	NA	1	NA	0	1	0	0	0	0	0	0	0	0
Firmicutes_Clostridia_Clostridiales_Clostridiaceae_Clostridium_Clostridium_cocleatum	3.27011e-05	5.34681e-09	3.27011e-05	3.27011e-05	5.34681e-09	3.27011e-05	1	NA	1	NA	1	NA	1	NA	1	0	0	0	0	0	1	0	0	0
Firmicutes_Clostridia_Clostridiales_Clostridiaceae_Clostridium_Clostridium_hiranonis	3.27011e-05	5.34681e-09	3.27011e-05	0	0	0	1	NA	0.423711	0.57424	1	NA	1	NA	0	1	0	0	0	0	0	0	0	0
Firmicutes_Clostridia_Clostridiales_Eubacteriaceae_Eubacterium_Eubacterium_saburreum	3.27011e-05	5.34681e-09	3.27011e-05	3.27011e-05	5.34681e-09	3.27011e-05	1	NA	1	NA	1	NA	1	NA	0	0	0	0	1	0	1	0	0	0
Firmicutes_Clostridia_Clostridiales_Lachnospiraceae_Anaerostipes_Anaerostipes_caccae	0	0	0	3.27011e-05	5.34681e-09	3.27011e-05	1	NA	0.423711	0.57424	1	NA	1	NA	0	0	0	0	0	0	1	0	0	0
Firmicutes_Clostridia_Clostridiales_Lachnospiraceae_Dorea_Dorea_formicigenerans	3.27011e-05	5.34681e-09	3.27011e-05	0	0	0	1	NA	0.423711	0.57424	1	NA	1	NA	0	0	1	0	0	0	0	0	0	0
Firmicutes_Clostridia_Clostridiales_Ruminococcaceae_Anaerotruncus_Anaerotruncus_colihominis	3.27011e-05	5.34681e-09	3.27011e-05	3.27011e-05	5.34681e-09	3.27011e-05	1	NA	1	NA	1	NA	1	NA	0	0	0	0	1	0	0	1	0	0
Firmicutes_Erysipelotrichia_Erysipelotrichales_Erysipelotrichaceae_Coprobacillus_Coprobacillus_cateniformis	3.27011e-05	5.34681e-09	3.27011e-05	0	0	0	1	NA	0.423711	0.57424	1	NA	1	NA	0	0	0	0	1	0	0	0	0	0
Proteobacteria_Alphaproteobacteria_Caulobacterales_Caulobacteraceae_Brevundimonas_Brevundimonas_vesicularis	0	0	0	3.27011e-05	5.34681e-09	3.27011e-05	1	NA	0.423711	0.57424	1	NA	1	NA	0	0	0	0	0	0	0	0	1	0
Proteobacteria_Betaproteobacteria_Other_Other_Other_Other	3.27011e-05	5.34681e-09	3.27011e-05	6.54022e-05	8.02022e-09	4.00505e-05	1	NA	0.600471	0.718911	1	NA	1	NA	0	0	0	0	1	1	1	0	0	0
Proteobacteria_Betaproteobacteria_Burkholderiales_Other_Other_Other	0	0	0	3.27011e-05	5.34681e-09	3.27011e-05	1	NA	0.423711	0.57424	1	NA	1	NA	0	0	0	0	0	0	0	1	0	0
Proteobacteria_Betaproteobacteria_Burkholderiales_Burkholderiaceae_Burkholderia_Other	3.27011e-05	5.34681e-09	3.27011e-05	0	0	0	1	NA	0.423711	0.57424	1	NA	1	NA	0	0	1	0	0	0	0	0	0	0
Proteobacteria_Betaproteobacteria_Burkholderiales_Burkholderiaceae_Ralstonia_Other	3.27011e-05	5.34681e-09	3.27011e-05	0	0	0	1	NA	0.423711	0.57424	1	NA	1	NA	0	0	0	0	1	0	0	0	0	0
Proteobacteria_Betaproteobacteria_Burkholderiales_Sutterellaceae_Other_Other	0	0	0	3.27011e-05	5.34681e-09	3.27011e-05	1	NA	0.423711	0.57424	1	NA	1	NA	0	0	0	0	0	0	1	0	0	0
Proteobacteria_Gammaproteobacteria_Enterobacteriales_Enterobacteriaceae_Escherichia-Shigella_Other	0.000163506	5.34681e-08	0.00010341	0.000163506	8.02022e-08	0.000126651	1	NA	1	NA	1	NA	1	NA	0	2	0	3	0	0	0	1	4	0
Verrucomicrobia_Other_Other_Other_Other_Other	3.27011e-05	5.34681e-09	3.27011e-05	0	0	0	1	NA	0.423711	0.57424	1	NA	1	NA	0	0	1	0	0	0	0	0	0	0
Bacteroidetes_Bacteroidia_Bacteroidales_Bacteroidaceae_Bacteroides_Bacteroides_pectinophilus	0	0	0	0	0	0	1	NA	NA	NA	NA	NA	NA	NA	0	0	0	0	0	0	0	0	0	0
Bacteroidetes_Flavobacteria_Flavobacteriales_Flavobacteriaceae_Cloacibacterium_Cloacibacterium_normanense	0	0	0	0	0	0	1	NA	NA	NA	NA	NA	NA	NA	0	0	0	0	0	0	0	0	0	0
Bacteroidetes_Flavobacteria_Flavobacteriales_Flavobacteriaceae_Flavobacterium_Flavobacterium_sasangense	0	0	0	0	0	0	1	NA	NA	NA	NA	NA	NA	NA	0	0	0	0	0	0	0	0	0	0
Bacteroidetes_Sphingobacteria_Sphingobacteriales_Chitinophagaceae_Chitinophaga_Other	0	0	0	0	0	0	1	NA	NA	NA	NA	NA	NA	NA	0	0	0	0	0	0	0	0	0	0
Firmicutes_Bacilli_Bacillales_Bacillaceae_Bacillus_Other	0	0	0	0	0	0	1	NA	NA	NA	NA	NA	NA	NA	0	0	0	0	0	0	0	0	0	0
Firmicutes_Bacilli_Lactobacillales_Enterococcaceae_Enterococcus_Enterococcus_gallinarum	0	0	0	0	0	0	1	NA	NA	NA	NA	NA	NA	NA	0	0	0	0	0	0	0	0	0	0
Firmicutes_Bacilli_Lactobacillales_Lactobacillaceae_Lactobacillus_Lactobacillus_amylolyticus	0	0	0	0	0	0	1	NA	NA	NA	NA	NA	NA	NA	0	0	0	0	0	0	0	0	0	0
Firmicutes_Bacilli_Lactobacillales_Lactobacillaceae_Lactobacillus_Lactobacillus_pontis	0	0	0	0	0	0	1	NA	NA	NA	NA	NA	NA	NA	0	0	0	0	0	0	0	0	0	0
Firmicutes_Bacilli_Lactobacillales_Lactobacillaceae_Lactobacillus_Lactobacillus_vaginalis	0	0	0	0	0	0	1	NA	NA	NA	NA	NA	NA	NA	0	0	0	0	0	0	0	0	0	0
Firmicutes_Clostridia_Clostridiales_Clostridiaceae_Clostridium_Clostridium_disporicum	0	0	0	0	0	0	1	NA	NA	NA	NA	NA	NA	NA	0	0	0	0	0	0	0	0	0	0
Firmicutes_Clostridia_Clostridiales_Clostridiaceae_Clostridium_Clostridium_methylpentosum	0	0	0	0	0	0	1	NA	NA	NA	NA	NA	NA	NA	0	0	0	0	0	0	0	0	0	0
Firmicutes_Clostridia_Clostridiales_Eubacteriaceae_Anaerofustis_Anaerofustis_stercorihominis	0	0	0	0	0	0	1	NA	NA	NA	NA	NA	NA	NA	0	0	0	0	0	0	0	0	0	0
Firmicutes_Clostridia_Clostridiales_Lachnospiraceae_Blautia_Other	0	0	0	0	0	0	1	NA	NA	NA	NA	NA	NA	NA	0	0	0	0	0	0	0	0	0	0
Firmicutes_Clostridia_Clostridiales_Lachnospiraceae_Johnsonella_Johnsonella_ignava	0	0	0	0	0	0	1	NA	NA	NA	NA	NA	NA	NA	0	0	0	0	0	0	0	0	0	0
Firmicutes_Clostridia_Clostridiales_Lachnospiraceae_Moryella_Moryella_indoligenes	0	0	0	0	0	0	1	NA	NA	NA	NA	NA	NA	NA	0	0	0	0	0	0	0	0	0	0
Firmicutes_Clostridia_Clostridiales_Ruminococcaceae_Ruminococcus_Ruminococcus_bromii	0	0	0	0	0	0	1	NA	NA	NA	NA	NA	NA	NA	0	0	0	0	0	0	0	0	0	0
Firmicutes_Erysipelotrichia_Erysipelotrichales_Erysipelotrichaceae_Other_Other	0	0	0	0	0	0	1	NA	NA	NA	NA	NA	NA	NA	0	0	0	0	0	0	0	0	0	0
Proteobacteria_Alphaproteobacteria_Caulobacterales_Caulobacteraceae_Other_Other	0	0	0	0	0	0	1	NA	NA	NA	NA	NA	NA	NA	0	0	0	0	0	0	0	0	0	0
Proteobacteria_Alphaproteobacteria_Rhizobiales_Other_Other_Other	0	0	0	0	0	0	1	NA	NA	NA	NA	NA	NA	NA	0	0	0	0	0	0	0	0	0	0
Proteobacteria_Alphaproteobacteria_Rhizobiales_Hyphomicrobiaceae_Devosia_Other	0	0	0	0	0	0	1	NA	NA	NA	NA	NA	NA	NA	0	0	0	0	0	0	0	0	0	0
Proteobacteria_Alphaproteobacteria_Sphingomonadales_Sphingomonadaceae_Other_Other	0	0	0	0	0	0	1	NA	NA	NA	NA	NA	NA	NA	0	0	0	0	0	0	0	0	0	0
Proteobacteria_Betaproteobacteria_Burkholderiales_Burkholderiaceae_Cupriavidus_Cupriavidus_gilardii	0	0	0	0	0	0	1	NA	NA	NA	NA	NA	NA	NA	0	0	0	0	0	0	0	0	0	0
Proteobacteria_Betaproteobacteria_Burkholderiales_Burkholderiales_incertae_sedis_Aquabacterium_Aquabacterium_hongkongensis	0	0	0	0	0	0	1	NA	NA	NA	NA	NA	NA	NA	0	0	0	0	0	0	0	0	0	0
Proteobacteria_Betaproteobacteria_Burkholderiales_Comamonadaceae_Other_Other	0	0	0	0	0	0	1	NA	NA	NA	NA	NA	NA	NA	0	0	0	0	0	0	0	0	0	0
Proteobacteria_Betaproteobacteria_Burkholderiales_Comamonadaceae_Acidovorax_Acidovorax_temperans	0	0	0	0	0	0	1	NA	NA	NA	NA	NA	NA	NA	0	0	0	0	0	0	0	0	0	0
Proteobacteria_Betaproteobacteria_Burkholderiales_Comamonadaceae_Comamonas_Comamonas_aquatica	0	0	0	0	0	0	1	NA	NA	NA	NA	NA	NA	NA	0	0	0	0	0	0	0	0	0	0
Proteobacteria_Betaproteobacteria_Burkholderiales_Oxalobacteraceae_Herbaspirillum_Herbaspirillum_chlorophenolicum	0	0	0	0	0	0	1	NA	NA	NA	NA	NA	NA	NA	0	0	0	0	0	0	0	0	0	0
Proteobacteria_Betaproteobacteria_Burkholderiales_Oxalobacteraceae_Herminiimonas_Other	0	0	0	0	0	0	1	NA	NA	NA	NA	NA	NA	NA	0	0	0	0	0	0	0	0	0	0
Proteobacteria_Betaproteobacteria_Burkholderiales_Oxalobacteraceae_Massilia_Other	0	0	0	0	0	0	1	NA	NA	NA	NA	NA	NA	NA	0	0	0	0	0	0	0	0	0	0
Proteobacteria_Betaproteobacteria_Burkholderiales_Oxalobacteraceae_Massilia_Massilia_niastensis	0	0	0	0	0	0	1	NA	NA	NA	NA	NA	NA	NA	0	0	0	0	0	0	0	0	0	0
Proteobacteria_Betaproteobacteria_Burkholderiales_Oxalobacteraceae_Massilia_Massilia_timonae	0	0	0	0	0	0	1	NA	NA	NA	NA	NA	NA	NA	0	0	0	0	0	0	0	0	0	0
Proteobacteria_Deltaproteobacteria_Other_Other_Other_Other	0	0	0	0	0	0	1	NA	NA	NA	NA	NA	NA	NA	0	0	0	0	0	0	0	0	0	0
Proteobacteria_Gammaproteobacteria_Aeromonadales_Aeromonadaceae_Aeromonas_Aeromonas_veronii	0	0	0	0	0	0	1	NA	NA	NA	NA	NA	NA	NA	0	0	0	0	0	0	0	0	0	0
Proteobacteria_Gammaproteobacteria_Alteromonadales_Shewanellaceae_Shewanella_Shewanella_decolorationis	0	0	0	0	0	0	1	NA	NA	NA	NA	NA	NA	NA	0	0	0	0	0	0	0	0	0	0
Proteobacteria_Gammaproteobacteria_Pseudomonadales_Moraxellaceae_Acinetobacter_Acinetobacter_lwoffii	0	0	0	0	0	0	1	NA	NA	NA	NA	NA	NA	NA	0	0	0	0	0	0	0	0	0	0
Proteobacteria_Gammaproteobacteria_Pseudomonadales_Pseudomonadaceae_Pseudomonas_Pseudomonas_aeruginosa	0	0	0	0	0	0	1	NA	NA	NA	NA	NA	NA	NA	0	0	0	0	0	0	0	0	0	0

## Sheet: S4_Table
S4 Table: Diversity and taxonomy composition in the first chronic cohort uninf. vs. inf
Alpha Diversity	mean chronic_infected (n=5)	var_grp1	stderr_grp1	mean chronic_uninfected (n=5)	var_grp2	stderr_grp2	npdiff_p	npdiff_q	mannwhitney_p	mannwhitney_q	ttest_p	ttest_q	1.4	2.2	3.3	A0	A2	7.2	7.4	8.4	9	9.1
goods_coverage	0.97734	1.30448e-05	0.00161523	0.983737	9.91141e-06	0.00140794	0.0222	0.0504	0.031746	0.0544218	0.0178232	0.0784481	0.971569	0.980454	0.979604	0.978947	0.976127	0.984201	0.983042	0.988373	0.983505	0.979565
margalef	73.6703	288.441	7.59528	51.8624	122.835	4.95652	0.0346	0.0504	0.031746	0.0544218	0.0477347	0.0784481	99.9853	60.7194	59.5385	67.2145	80.8936	52.945	54.6179	34.9358	50.9767	65.8368
fisher_alpha	145.37	1761.42	18.7692	94.4542	578.198	10.7536	0.0352	0.0504	0.031746	0.0544218	0.0543246	0.0784481	211.119	113.778	111.08	128.87	162.004	96.2864	99.996	58.3938	91.9614	125.634
observed_species	749.6	29783.3	77.1794	528	12683.5	50.3657	0.0372	0.0504	0.031746	0.0544218	0.0477347	0.0784481	1017	618	606	684	823	539	556	356	519	670
mcintosh_d	0.526496	0.00213225	0.0206507	0.396957	0.00903498	0.0425088	0.0372	0.0504	0.0555556	0.0666667	0.0349545	0.0784481	0.504564	0.525728	0.475862	0.525779	0.600544	0.509627	0.369612	0.307116	0.313729	0.484703
shannon	3.20752	0.244639	0.221196	2.33349	0.268737	0.231835	0.0392	0.0504	0.031746	0.0544218	0.0259925	0.0784481	3.7161	3.06951	2.5558	3.00414	3.69203	2.89986	2.30578	1.73058	1.92527	2.80598
brillouin_d	2.1885	0.111994	0.149662	1.59341	0.125954	0.158716	0.0392	0.0504	0.031746	0.0544218	0.0260131	0.0784481	2.52682	2.09924	1.74514	2.05101	2.52028	1.98494	1.5728	1.18381	1.31144	1.91405
simpson_reciprocal	4.509	0.948037	0.435439	2.90175	0.899798	0.424216	0.04	0.0504	0.0555556	0.0666667	0.0295538	0.0784481	4.02295	4.38512	3.59933	4.38604	6.15154	4.10539	2.49818	2.07152	2.11127	3.72239
gini_index	0.99344	9.71164e-06	0.00139367	0.996632	1.42666e-06	0.000534164	0.0418	0.0504	0.031746	0.0544218	0.0838519	0.100622	0.988489	0.995502	0.996072	0.994817	0.992318	0.996324	0.996488	0.9983	0.99704	0.995006
PD_whole_tree	66.4545	140.345	5.29802	51.0955	100.848	4.49105	0.0442	0.0504	0.0555556	0.0666667	0.0588361	0.0784481	85.5466	56.9263	57.3815	62.7708	69.6472	51.7128	54.3542	35.1137	51.5046	62.7919
chao1	4888.8	2.29704e+06	677.796	3362.45	665600	364.856	0.0462	0.0504	0.0952381	0.103896	0.0935634	0.102069	4440.8	4489.67	7562.4	4053.09	3898.05	2435.27	3086.03	3177.88	3452.9	4660.17
strong	0.911614	0.000623198	0.0111642	0.934924	0.000195552	0.00625384	0.1006	0.1006	0.150794	0.150794	0.116123	0.116123	0.875726	0.917849	0.942313	0.92165	0.900533	0.93103	0.929293	0.95408	0.942798	0.91742
Type_c_otu_table_even25887.phylum	mean chronic_infected (n=5)	var_grp1	stderr_grp1	mean chronic_uninfected (n=5)	var_grp2	stderr_grp2	npdiff_p	npdiff_q	mannwhitney_p	mannwhitney_q	nbinom_p	nbinom_q	fishers_p	fishers_q	1.4	2.2	3.3	A0	A2	7.2	7.4	8.4	9	9.1
Other	0.00757909	6.74612e-05	0.00367318	0.00275814	1.45537e-06	0.000539514	0.3656	0.61152	0.84127	0.913906	0.00192341	0.0133908	2.24091e-65	5.22878e-65	330	42	26	77	506	73	64	27	79	114
Verrucomicrobia	0.00146019	1.0243e-05	0.00143129	0.000115888	2.08913e-08	6.46394e-05	0.8952	0.8952	0.913906	0.913906	0.00382595	0.0133908	8.5637e-34	1.49865e-33	186	0	1	2	0	0	2	0	4	9
Firmicutes	0.980562	0.000388308	0.00881259	0.99042	3.03871e-05	0.00246524	0.366	0.61152	0.547619	0.913906	0.0619896	0.136914	1.63299e-97	1.1431e-96	24669	25833	25814	25556	25047	25649	25467	25852	25664	25563
Bacteroidetes	0.00740912	0.000100226	0.00447719	0.00244911	4.79275e-06	0.000979056	0.3496	0.61152	0.290347	0.913906	0.0782366	0.136914	2.37845e-72	8.32457e-72	634	4	4	172	145	4	94	0	102	117
Deferribacteres	0	0	0	2.31777e-05	1.19379e-09	1.54518e-05	0.4368	0.61152	0.179712	0.913906	0.248763	0.329655	0.249997	0.249997	0	0	0	0	0	1	2	0	0	0
Proteobacteria	0.00203963	2.52292e-06	0.00071034	0.00360799	1.33015e-05	0.00163104	0.418	0.61152	0.690476	0.913906	0.282562	0.329655	7.33053e-14	1.02627e-13	38	5	41	64	116	154	228	8	22	55
Actinobacteria	0.000942558	1.31063e-06	0.000511982	0.000618071	2.76809e-07	0.000235291	0.6714	0.7833	0.833534	0.913906	0.46315	0.46315	0.00390326	0.0045538	30	2	1	16	73	5	30	0	16	29
Unclassified_Other	7.72589e-06	2.98447e-10	7.72589e-06	7.72589e-06	2.98447e-10	7.72589e-06	1	NA	1	NA	1	NA	1	NA	0	1	0	0	0	1	0	0	0	0
Type_c_otu_table_even25887.class	mean chronic_infected (n=5)	var_grp1	stderr_grp1	mean chronic_uninfected (n=5)	var_grp2	stderr_grp2	npdiff_p	npdiff_q	mannwhitney_p	mannwhitney_q	nbinom_p	nbinom_q	fishers_p	fishers_q	1.4	2.2	3.3	A0	A2	7.2	7.4	8.4	9	9.1
Other_Other	0.00757909	6.74612e-05	0.00367318	0.00275814	1.45537e-06	0.000539514	0.376	0.62692	0.84127	0.913906	0.00192341	0.0155749	2.24091e-65	6.27453e-65	330	42	26	77	506	73	64	27	79	114
Proteobacteria_Gammaproteobacteria	6.9533e-05	3.28291e-09	2.56239e-05	0.000285858	9.66967e-08	0.000139066	0.2854	0.62692	0.339783	0.614652	0.00358405	0.0155749	4.05e-05	6.3e-05	2	0	1	4	2	14	18	2	0	3
Verrucomicrobia_Verrucomicrobiae	0.00146019	1.0243e-05	0.00143129	0.000115888	2.08913e-08	6.46394e-05	0.8912	0.9868	0.913906	0.913906	0.00382595	0.0155749	8.5637e-34	1.9982e-33	186	0	1	2	0	0	2	0	4	9
Firmicutes_Erysipelotrichia	0.0124928	0.000695115	0.0117908	0.00358481	4.29047e-06	0.000926333	0.9868	0.9868	0.309524	0.614652	0.00389372	0.0155749	7.85093e-142	3.66377e-141	25	0	8	1544	40	136	64	156	24	84
Firmicutes_Bacilli	0.720269	0.0318913	0.079864	0.883378	0.00761248	0.0390192	0.1174	0.55888	0.309524	0.614652	0.0163809	0.0524187	0	0	19357	15930	24932	20307	12702	19287	21973	24181	24615	24284
Proteobacteria_Other	0	0	0	4.63553e-05	2.5368e-09	2.25246e-05	0.1834	0.55888	0.0720057	0.614652	0.0351529	0.093741	0.0312482	0.0397704	0	0	0	0	0	2	3	0	0	1
Bacteroidetes_Bacteroidia	0.00728551	9.99114e-05	0.00447015	0.0023564	4.47819e-06	0.000946382	0.3308	0.62692	0.345742	0.614652	0.074274	0.165196	5.00336e-73	1.75118e-72	631	4	1	167	140	4	86	0	101	114
Firmicutes_Other	0.00659018	1.10788e-05	0.00148854	0.00343029	4.8314e-06	0.000982996	0.1248	0.55888	0.222222	0.614652	0.0832413	0.165196	6.81029e-30	1.36206e-29	287	167	47	196	156	178	103	81	50	32
Firmicutes_Clostridia	0.24121	0.0318721	0.07984	0.100027	0.00689479	0.0371343	0.1746	0.55888	0.309524	0.614652	0.0929228	0.165196	0	0	5000	9736	827	3509	12149	6048	3327	1434	975	1163
Bacteroidetes_Other	6.9533e-05	2.5368e-09	2.25246e-05	2.31777e-05	1.19379e-09	1.54518e-05	0.1996	0.55888	0.157163	0.614652	0.226427	0.361837	0.145987	0.170318	2	0	1	3	3	0	2	0	1	0
Deferribacteres_Deferribacteres	0	0	0	2.31777e-05	1.19379e-09	1.54518e-05	0.4478	0.62692	0.179712	0.614652	0.248763	0.361837	0.249997	0.249997	0	0	0	0	0	1	2	0	0	0
Proteobacteria_Betaproteobacteria	0.00185421	2.34057e-06	0.000684188	0.00308263	9.15962e-06	0.00135349	0.435	0.62692	0.690476	0.913906	0.358295	0.477727	3.89666e-10	6.81915e-10	35	4	33	58	110	135	188	6	22	48
Proteobacteria_Alphaproteobacteria	0.000100437	9.40107e-09	4.33614e-05	0.000169969	8.77433e-08	0.000132471	0.9284	0.9868	0.828263	0.913906	0.425318	0.523469	0.175436	0.188931	1	1	7	2	2	2	18	0	0	2
Actinobacteria_Actinobacteria	0.000942558	1.31063e-06	0.000511982	0.000618071	2.76809e-07	0.000235291	0.6836	0.870036	0.833534	0.913906	0.46315	0.529314	0.00390326	0.00546456	30	2	1	16	73	5	30	0	16	29
Bacteroidetes_Flavobacteria	3.86294e-05	1.49223e-09	1.72756e-05	4.63553e-05	4.77514e-09	3.09035e-05	1	NA	1	NA	0.882058	0.940862	1	NA	0	0	2	2	1	0	4	0	0	2
Bacteroidetes_Sphingobacteria	1.54518e-05	4.4767e-10	9.46224e-06	2.31777e-05	1.19379e-09	1.54518e-05	1	NA	0.904861	0.913906	0.953337	0.953337	1	NA	1	0	0	0	1	0	2	0	0	1
Unclassified_Other_Other	7.72589e-06	2.98447e-10	7.72589e-06	7.72589e-06	2.98447e-10	7.72589e-06	1	NA	1	NA	1	NA	1	NA	0	1	0	0	0	1	0	0	0	0
Proteobacteria_Deltaproteobacteria	1.54518e-05	1.19379e-09	1.54518e-05	2.31777e-05	4.4767e-10	9.46224e-06	1	NA	0.473289	0.757263	1	NA	1	NA	0	0	0	0	2	1	1	0	0	1
Type_c_otu_table_even25887.order	mean chronic_infected (n=5)	var_grp1	stderr_grp1	mean chronic_uninfected (n=5)	var_grp2	stderr_grp2	npdiff_p	npdiff_q	mannwhitney_p	mannwhitney_q	nbinom_p	nbinom_q	fishers_p	fishers_q	1.4	2.2	3.3	A0	A2	7.2	7.4	8.4	9	9.1
Other_Other_Other	0.00757909	6.74612e-05	0.00367318	0.00275814	1.45537e-06	0.000539514	0.376	0.745857	0.84127	0.916563	0.00192341	0.0324476	2.24091e-65	1.03082e-64	330	42	26	77	506	73	64	27	79	114
Verrucomicrobia_Verrucomicrobiae_Verrucomicrobiales	0.00146019	1.0243e-05	0.00143129	0.000115888	2.08913e-08	6.46394e-05	0.8952	0.935891	0.913906	0.916563	0.00382595	0.0324476	8.5637e-34	3.28275e-33	186	0	1	2	0	0	2	0	4	9
Firmicutes_Erysipelotrichia_Erysipelotrichales	0.0124928	0.000695115	0.0117908	0.00358481	4.29047e-06	0.000926333	0.9826	0.9826	0.309524	0.584752	0.00389372	0.0324476	7.85093e-142	6.01905e-141	25	0	8	1544	40	136	64	156	24	84
Firmicutes_Bacilli_Lactobacillales	0.719056	0.0317123	0.0796395	0.882258	0.00763728	0.0390827	0.1274	0.745857	0.309524	0.584752	0.0164123	0.0944363	0	0	19334	15913	24899	20233	12692	19251	21946	24162	24597	24239
Proteobacteria_Gammaproteobacteria_Pseudomonadales	2.31777e-05	1.19379e-09	1.54518e-05	0.000162244	3.76043e-08	8.67229e-05	0.2802	0.745857	0.314305	0.584752	0.0188873	0.0944363	0.000276995	0.000707877	1	0	0	2	0	8	11	0	0	2
Proteobacteria_Other_Other	0	0	0	4.63553e-05	2.5368e-09	2.25246e-05	0.1712	0.745857	0.0720057	0.584752	0.0351529	0.14647	0.0312482	0.0653371	0	0	0	0	0	2	3	0	0	1
Proteobacteria_Gammaproteobacteria_Other	0	0	0	3.86294e-05	4.4767e-09	2.99222e-05	0.447	0.745857	0.179712	0.584752	0.0730482	0.206992	0.0624976	0.110573	0	0	0	0	0	1	4	0	0	0
Bacteroidetes_Bacteroidia_Bacteroidales	0.00728551	9.99114e-05	0.00447015	0.0023564	4.47819e-06	0.000946382	0.3602	0.745857	0.345742	0.584752	0.074274	0.206992	5.00336e-73	2.87693e-72	631	4	1	167	140	4	86	0	101	114
Firmicutes_Other_Other	0.00659018	1.10788e-05	0.00148854	0.00343029	4.8314e-06	0.000982996	0.1306	0.745857	0.222222	0.584752	0.0832413	0.206992	6.81029e-30	2.23767e-29	287	167	47	196	156	178	103	81	50	32
Firmicutes_Bacilli_Bacillales	0.000146792	6.26738e-09	3.54045e-05	0.000270406	3.65597e-08	8.55099e-05	0.2344	0.745857	0.201677	0.584752	0.0921122	0.206992	0.0402029	0.0770555	3	6	2	6	2	4	7	2	7	15
Firmicutes_Clostridia_Clostridiales	0.241094	0.0318464	0.0798077	0.0999807	0.0068941	0.0371325	0.1762	0.745857	0.309524	0.584752	0.0930343	0.206992	0	0	4995	9732	827	3508	12144	6047	3325	1433	975	1161
Firmicutes_Clostridia_Other	0.000115888	8.20728e-09	4.05149e-05	4.63553e-05	1.04456e-09	1.44538e-05	0.1864	0.745857	0.336745	0.584752	0.0993562	0.206992	0.0783419	0.128705	5	4	0	1	5	1	2	1	0	2
Actinobacteria_Actinobacteria_Actinomycetales	7.72589e-06	2.98447e-10	7.72589e-06	3.86294e-05	4.4767e-09	2.99222e-05	0.721	0.921278	0.518605	0.669865	0.223757	0.388693	0.218745	0.279507	0	0	0	1	0	0	4	0	0	1
Bacteroidetes_Other_Other	6.9533e-05	2.5368e-09	2.25246e-05	2.31777e-05	1.19379e-09	1.54518e-05	0.2114	0.745857	0.157163	0.584752	0.226427	0.388693	0.145987	0.209856	2	0	1	3	3	0	2	0	1	0
Deferribacteres_Deferribacteres_Deferribacterales	0	0	0	2.31777e-05	1.19379e-09	1.54518e-05	0.454	0.745857	0.179712	0.584752	0.248763	0.388693	0.249997	0.287497	0	0	0	0	0	1	2	0	0	0
Proteobacteria_Betaproteobacteria_Neisseriales	0	0	0	2.31777e-05	1.19379e-09	1.54518e-05	0.4494	0.745857	0.179712	0.584752	0.248763	0.388693	0.249997	0.287497	0	0	0	0	0	0	2	0	0	1
Proteobacteria_Alphaproteobacteria_Caulobacterales	3.86294e-05	2.23835e-09	2.11582e-05	8.49847e-05	2.19358e-08	6.62357e-05	0.852	0.935891	1	NA	0.351435	0.510492	0.210099	0.279507	0	1	3	0	1	1	9	0	0	1
Proteobacteria_Betaproteobacteria_Burkholderiales	0.00185421	2.34057e-06	0.000684188	0.00305172	8.9437e-06	0.00133744	0.4428	0.745857	0.690476	0.82326	0.367554	0.510492	9.42751e-10	2.71041e-09	35	4	33	58	110	135	185	6	22	47
Actinobacteria_Actinobacteria_Coriobacteriales	0.00091938	1.35152e-06	0.000519907	0.000579441	2.29804e-07	0.000214385	0.6844	0.921278	0.916563	0.916563	0.413202	0.530667	0.00201253	0.00462881	30	0	1	15	73	5	26	0	16	28
Proteobacteria_Alphaproteobacteria_Rhizobiales	2.31777e-05	1.19379e-09	1.54518e-05	5.40812e-05	1.01472e-08	4.50493e-05	0.8798	0.935891	1	NA	0.424534	0.530667	0.34374	0.376478	0	0	2	1	0	1	6	0	0	0
Firmicutes_Bacilli_Other	0.00106617	8.80865e-07	0.00041973	0.000849847	1.1714e-07	0.000153062	0.7642	0.925084	1	NA	0.447318	0.532521	0.0862859	0.132305	20	11	31	68	8	32	20	17	11	30
Proteobacteria_Gammaproteobacteria_Enterobacteriales	3.86294e-05	1.49223e-09	1.72756e-05	6.18071e-05	3.43214e-09	2.61998e-05	0.666	0.921278	0.664389	0.82326	0.577406	0.656144	0.581045	0.607456	0	0	1	2	2	4	2	1	0	1
Proteobacteria_Alphaproteobacteria_Sphingomonadales	3.86294e-05	7.46116e-10	1.22157e-05	2.31777e-05	1.19379e-09	1.54518e-05	0.6816	0.921278	0.433848	0.584752	0.80208	0.871826	0.726558	0.726558	1	0	2	1	1	0	2	0	0	1
Bacteroidetes_Flavobacteria_Flavobacteriales	3.86294e-05	1.49223e-09	1.72756e-05	4.63553e-05	4.77514e-09	3.09035e-05	1	NA	1	NA	0.882058	0.918811	1	NA	0	0	2	2	1	0	4	0	0	2
Bacteroidetes_Sphingobacteria_Sphingobacteriales	1.54518e-05	4.4767e-10	9.46224e-06	2.31777e-05	1.19379e-09	1.54518e-05	1	NA	0.904861	0.916563	0.953337	0.953337	1	NA	1	0	0	0	1	0	2	0	0	1
Unclassified_Other_Other_Other	7.72589e-06	2.98447e-10	7.72589e-06	7.72589e-06	2.98447e-10	7.72589e-06	1	NA	1	NA	1	NA	1	NA	0	1	0	0	0	1	0	0	0	0
Actinobacteria_Actinobacteria_Other	7.72589e-06	2.98447e-10	7.72589e-06	0	0	0	1	NA	0.423711	0.584752	1	NA	1	NA	0	1	0	0	0	0	0	0	0	0
Actinobacteria_Actinobacteria_Bifidobacteriales	7.72589e-06	2.98447e-10	7.72589e-06	0	0	0	1	NA	0.423711	0.584752	1	NA	1	NA	0	1	0	0	0	0	0	0	0	0
Proteobacteria_Alphaproteobacteria_Rhodobacterales	0	0	0	7.72589e-06	2.98447e-10	7.72589e-06	1	NA	0.423711	0.584752	1	NA	1	NA	0	0	0	0	0	0	1	0	0	0
Proteobacteria_Betaproteobacteria_Other	0	0	0	7.72589e-06	2.98447e-10	7.72589e-06	1	NA	0.423711	0.584752	1	NA	1	NA	0	0	0	0	0	0	1	0	0	0
Proteobacteria_Deltaproteobacteria_Other	0	0	0	7.72589e-06	2.98447e-10	7.72589e-06	1	NA	0.423711	0.584752	1	NA	1	NA	0	0	0	0	0	0	0	0	0	1
Proteobacteria_Deltaproteobacteria_Bdellovibrionales	1.54518e-05	1.19379e-09	1.54518e-05	1.54518e-05	4.4767e-10	9.46224e-06	1	NA	0.796253	0.914217	1	NA	1	NA	0	0	0	0	2	1	1	0	0	0
Proteobacteria_Gammaproteobacteria_Aeromonadales	0	0	0	7.72589e-06	2.98447e-10	7.72589e-06	1	NA	0.423711	0.584752	1	NA	1	NA	0	0	0	0	0	0	0	1	0	0
Proteobacteria_Gammaproteobacteria_Alteromonadales	7.72589e-06	2.98447e-10	7.72589e-06	0	0	0	1	NA	0.423711	0.584752	1	NA	1	NA	1	0	0	0	0	0	0	0	0	0
Proteobacteria_Gammaproteobacteria_Vibrionales	0	0	0	7.72589e-06	2.98447e-10	7.72589e-06	1	NA	0.423711	0.584752	1	NA	1	NA	0	0	0	0	0	0	1	0	0	0
Proteobacteria_Gammaproteobacteria_Xanthomonadales	0	0	0	7.72589e-06	2.98447e-10	7.72589e-06	1	NA	0.423711	0.584752	1	NA	1	NA	0	0	0	0	0	1	0	0	0	0
Type_c_otu_table_even25887.family	mean chronic_infected (n=5)	var_grp1	stderr_grp1	mean chronic_uninfected (n=5)	var_grp2	stderr_grp2	npdiff_p	npdiff_q	mannwhitney_p	mannwhitney_q	nbinom_p	nbinom_q	fishers_p	fishers_q	1.4	2.2	3.3	A0	A2	7.2	7.4	8.4	9	9.1
Firmicutes_Clostridia_Clostridiales_Other	0.0167497	0.000424462	0.0092137	0.00376251	6.07085e-06	0.00110189	0.4036	0.802435	0.916563	0.916563	0.00172683	0.0366009	1.43029e-235	2.05008e-234	1087	49	10	80	942	63	92	45	80	207
Other_Other_Other_Other	0.00757909	6.74612e-05	0.00367318	0.00275814	1.45537e-06	0.000539514	0.376	0.802435	0.84127	0.916563	0.00192341	0.0366009	2.24091e-65	1.37656e-64	330	42	26	77	506	73	64	27	79	114
Firmicutes_Clostridia_Clostridiales_Ruminococcaceae	0.0921389	0.0234733	0.0685176	0.010345	0.000104888	0.00458013	0.3988	0.802435	1	NA	0.00275627	0.0366009	0	0	2576	3	10	133	9204	69	163	7	591	509
Verrucomicrobia_Verrucomicrobiae_Verrucomicrobiales_Verrucomicrobiaceae	0.00146019	1.0243e-05	0.00143129	0.000115888	2.08913e-08	6.46394e-05	0.8926	0.915487	0.913906	0.916563	0.00382595	0.0366009	8.5637e-34	3.68239e-33	186	0	1	2	0	0	2	0	4	9
Firmicutes_Erysipelotrichia_Erysipelotrichales_Erysipelotrichaceae	0.0124928	0.000695115	0.0117908	0.00358481	4.29047e-06	0.000926333	0.9866	0.9866	0.309524	0.679916	0.00389372	0.0366009	7.85093e-142	5.6265e-141	25	0	8	1544	40	136	64	156	24	84
Firmicutes_Bacilli_Lactobacillales_Lactobacillaceae	0.718291	0.0316946	0.0796173	0.881392	0.00761779	0.0390328	0.1306	0.802435	0.309524	0.679916	0.0163562	0.128124	0	0	19315	15902	24874	20214	12667	19236	21918	24141	24569	24219
Proteobacteria_Other_Other_Other	0	0	0	4.63553e-05	2.5368e-09	2.25246e-05	0.1652	0.802435	0.0720057	0.679916	0.0351529	0.235232	0.0312482	0.0707196	0	0	0	0	0	2	3	0	0	1
Bacteroidetes_Bacteroidia_Bacteroidales_Porphyromonadaceae	0.00404064	3.77987e-05	0.0027495	0.000896203	8.94892e-07	0.000423058	0.3198	0.802435	0.344267	0.679916	0.0432953	0.235232	3.46897e-58	1.86457e-57	381	2	1	94	45	0	19	0	52	45
Firmicutes_Clostridia_Clostridiales_Eubacteriaceae	0.00269633	1.4572e-05	0.00170716	0.00030131	2.15926e-07	0.000207811	0.4396	0.802435	0.914184	0.916563	0.0450444	0.235232	1.53966e-55	7.35615e-55	210	0	0	0	139	4	1	0	5	29
Proteobacteria_Gammaproteobacteria_Pseudomonadales_Pseudomonadaceae	7.72589e-06	2.98447e-10	7.72589e-06	6.18071e-05	6.4166e-09	3.58235e-05	0.285	0.802435	0.193816	0.679916	0.0532506	0.250278	0.0390592	0.0839774	1	0	0	0	0	2	5	0	0	1
Proteobacteria_Gammaproteobacteria_Other_Other	0	0	0	3.86294e-05	4.4767e-09	2.99222e-05	0.4382	0.802435	0.179712	0.679916	0.0730482	0.300949	0.0624976	0.127971	0	0	0	0	0	1	4	0	0	0
Firmicutes_Clostridia_Clostridiales_Lachnospiraceae	0.0136748	0.000399186	0.00893516	0.0041179	1.61016e-05	0.00179453	0.4258	0.802435	1	NA	0.0800162	0.300949	1.41512e-147	1.217e-146	553	3	9	26	1179	97	104	0	55	277
Firmicutes_Other_Other_Other	0.00659018	1.10788e-05	0.00148854	0.00343029	4.8314e-06	0.000982996	0.1222	0.802435	0.222222	0.679916	0.0832413	0.300949	6.81029e-30	2.6622e-29	287	167	47	196	156	178	103	81	50	32
Firmicutes_Clostridia_Other_Other	0.000115888	8.20728e-09	4.05149e-05	4.63553e-05	1.04456e-09	1.44538e-05	0.181	0.802435	0.336745	0.679916	0.0993562	0.332694	0.0783419	0.153123	5	4	0	1	5	1	2	1	0	2
Proteobacteria_Betaproteobacteria_Burkholderiales_Burkholderiales_incertae_sedis	0.000208599	3.32768e-08	8.15804e-05	0.000556264	6.82398e-07	0.000369431	0.5758	0.841212	0.833534	0.916563	0.106179	0.332694	6.87372e-06	2.27361e-05	1	0	7	8	11	11	52	0	4	5
Proteobacteria_Betaproteobacteria_Burkholderiales_Alcaligenaceae	0	0	0	3.09035e-05	4.77514e-09	3.09035e-05	1	NA	0.423711	0.679916	0.126301	0.37101	0.124997	0.223953	0	0	0	0	0	4	0	0	0	0
Proteobacteria_Betaproteobacteria_Burkholderiales_Burkholderiaceae	5.40812e-05	4.17825e-09	2.89076e-05	0.000169969	5.11836e-08	0.000101177	0.407	0.802435	0.745683	0.894819	0.145422	0.402048	0.0081266	0.0205555	2	1	0	0	4	8	13	0	0	1
Proteobacteria_Gammaproteobacteria_Pseudomonadales_Moraxellaceae	1.54518e-05	1.19379e-09	1.54518e-05	0.000100437	1.46239e-08	5.40812e-05	0.2868	0.802435	0.237504	0.679916	0.194894	0.449687	0.00738364	0.0198435	0	0	0	2	0	6	6	0	0	1
Bacteroidetes_Bacteroidia_Bacteroidales_Other	0.00321397	1.53173e-05	0.00175028	0.00145247	1.67921e-06	0.000579519	0.398	0.802435	0.463344	0.695016	0.195908	0.449687	2.30249e-20	8.2506e-20	248	1	0	73	94	4	67	0	48	69
Proteobacteria_Betaproteobacteria_Burkholderiales_Comamonadaceae	0.00013134	1.31316e-08	5.12477e-05	0.000270406	8.58034e-08	0.000130999	0.384	0.802435	0.674236	0.847403	0.225583	0.449687	0.017522	0.0418582	0	2	4	3	8	13	17	1	4	0
Bacteroidetes_Other_Other_Other	6.9533e-05	2.5368e-09	2.25246e-05	2.31777e-05	1.19379e-09	1.54518e-05	0.2054	0.802435	0.157163	0.679916	0.226427	0.449687	0.145987	0.251097	2	0	1	3	3	0	2	0	1	0
Firmicutes_Bacilli_Lactobacillales_Streptococcaceae	3.86294e-05	2.98447e-09	2.44314e-05	7.72589e-06	2.98447e-10	7.72589e-06	0.4464	0.802435	0.440686	0.679916	0.226941	0.449687	0.218745	0.335929	3	0	0	2	0	0	0	0	0	1
Actinobacteria_Actinobacteria_Actinomycetales_Micrococcaceae	0	0	0	2.31777e-05	2.68602e-09	2.31777e-05	1	NA	0.423711	0.679916	0.229508	0.449687	0.249997	0.335934	0	0	0	0	0	0	3	0	0	0
Deferribacteres_Deferribacteres_Deferribacterales_Deferribacteraceae	0	0	0	2.31777e-05	1.19379e-09	1.54518e-05	0.4406	0.802435	0.179712	0.679916	0.248763	0.449687	0.249997	0.335934	0	0	0	0	0	1	2	0	0	0
Proteobacteria_Alphaproteobacteria_Rhizobiales_Hyphomicrobiaceae	0	0	0	2.31777e-05	1.19379e-09	1.54518e-05	0.4474	0.802435	0.179712	0.679916	0.248763	0.449687	0.249997	0.335934	0	0	0	0	0	1	2	0	0	0
Proteobacteria_Betaproteobacteria_Neisseriales_Neisseriaceae	0	0	0	2.31777e-05	1.19379e-09	1.54518e-05	0.4402	0.802435	0.179712	0.679916	0.248763	0.449687	0.249997	0.335934	0	0	0	0	0	0	2	0	0	1
Firmicutes_Bacilli_Bacillales_Staphylococcaceae	0.000123614	4.77514e-09	3.09035e-05	0.000193147	2.31296e-08	6.80141e-05	0.4614	0.802435	0.594729	0.823471	0.26358	0.458825	0.210987	0.335929	3	5	2	5	1	3	2	2	7	11
Proteobacteria_Alphaproteobacteria_Caulobacterales_Caulobacteraceae	3.86294e-05	2.23835e-09	2.11582e-05	8.49847e-05	2.19358e-08	6.62357e-05	0.8638	0.915487	1	NA	0.351435	0.586565	0.210099	0.335929	0	1	3	0	1	1	9	0	0	1
Firmicutes_Bacilli_Bacillales_Planococcaceae	7.72589e-06	2.98447e-10	7.72589e-06	3.09035e-05	2.5368e-09	2.25246e-05	0.7286	0.857176	0.518605	0.756883	0.361923	0.586565	0.374995	0.48863	0	0	0	0	1	0	1	0	0	3
Actinobacteria_Actinobacteria_Coriobacteriales_Coriobacteriaceae	0.00091938	1.35152e-06	0.000519907	0.000579441	2.29804e-07	0.000214385	0.6854	0.841212	0.916563	0.916563	0.413202	0.64735	0.00201253	0.00576924	30	0	1	15	73	5	26	0	16	28
Firmicutes_Bacilli_Other_Other	0.00106617	8.80865e-07	0.00041973	0.000849847	1.1714e-07	0.000153062	0.7722	0.882514	1	NA	0.447318	0.678191	0.0862859	0.161317	20	11	31	68	8	32	20	17	11	30
Firmicutes_Bacilli_Lactobacillales_Carnobacteriaceae	0	0	0	1.54518e-05	4.4767e-10	9.46224e-06	0.4496	0.802435	0.177016	0.679916	0.5	0.734375	0.499998	0.59722	0	0	0	0	0	1	0	0	0	1
Firmicutes_Bacilli_Bacillales_Bacillaceae	7.72589e-06	2.98447e-10	7.72589e-06	2.31777e-05	2.68602e-09	2.31777e-05	1	NA	1	NA	0.524575	0.736318	0.624997	0.655485	0	1	0	0	0	0	3	0	0	0
Proteobacteria_Betaproteobacteria_Burkholderiales_Oxalobacteraceae	0.00117433	1.2196e-06	0.000493883	0.00172287	2.48427e-06	0.000704879	0.5692	0.841212	0.690476	0.847403	0.532656	0.736318	0.000297571	0.000913968	24	0	19	32	77	84	92	4	13	30
Proteobacteria_Gammaproteobacteria_Enterobacteriales_Enterobacteriaceae	3.86294e-05	1.49223e-09	1.72756e-05	6.18071e-05	3.43214e-09	2.61998e-05	0.6552	0.841212	0.664389	0.847403	0.577406	0.74037	0.581045	0.655485	0	0	1	2	2	4	2	1	0	1
Proteobacteria_Betaproteobacteria_Burkholderiales_Other	0.000108162	7.01349e-09	3.74526e-05	0.000146792	1.74591e-08	5.90917e-05	0.6544	0.841212	0.671373	0.847403	0.606886	0.74037	0.486822	0.59722	5	0	1	4	4	8	7	1	1	2
Bacteroidetes_Bacteroidia_Bacteroidales_Bacteroidaceae	2.31777e-05	4.4767e-10	9.46224e-06	7.72589e-06	2.98447e-10	7.72589e-06	0.52	0.84064	0.270344	0.679916	0.625	0.74037	0.624997	0.655485	1	1	0	0	1	0	0	0	1	0
Firmicutes_Bacilli_Bacillales_Other	7.72589e-06	2.98447e-10	7.72589e-06	2.31777e-05	4.4767e-10	9.46224e-06	0.5254	0.84064	0.270344	0.679916	0.625	0.74037	0.624997	0.655485	0	0	0	1	0	1	1	0	0	1
Firmicutes_Clostridia_Clostridiales_Clostridiaceae	0.115834	0.0226803	0.0673503	0.081454	0.00833743	0.0408349	0.6776	0.841212	0.690476	0.847403	0.626039	0.74037	4.98173e-189	5.35536e-188	569	9677	798	3269	680	5814	2965	1381	244	139
Firmicutes_Bacilli_Lactobacillales_Other	0.000571716	5.99878e-08	0.000109533	0.000641249	1.68622e-08	5.80728e-05	0.6198	0.841212	0.344267	0.679916	0.630102	0.74037	0.523175	0.608014	11	11	25	17	10	12	18	21	17	15
Proteobacteria_Alphaproteobacteria_Sphingomonadales_Sphingomonadaceae	3.86294e-05	7.46116e-10	1.22157e-05	2.31777e-05	1.19379e-09	1.54518e-05	0.694	0.841212	0.433848	0.679916	0.80208	0.919457	0.726558	0.743857	1	0	2	1	1	0	2	0	0	1
Proteobacteria_Alphaproteobacteria_Rhizobiales_Bartonellaceae	2.31777e-05	1.19379e-09	1.54518e-05	3.09035e-05	4.77514e-09	3.09035e-05	1	NA	0.79717	0.916563	0.825372	0.92043	1	NA	0	0	2	1	0	0	4	0	0	0
Proteobacteria_Deltaproteobacteria_Bdellovibrionales_Bacteriovoracaceae	1.54518e-05	1.19379e-09	1.54518e-05	7.72589e-06	2.98447e-10	7.72589e-06	1	NA	1	NA	0.855562	0.92043	1	NA	0	0	0	0	2	0	1	0	0	0
Bacteroidetes_Flavobacteria_Flavobacteriales_Flavobacteriaceae	3.86294e-05	1.49223e-09	1.72756e-05	4.63553e-05	4.77514e-09	3.09035e-05	1	NA	1	NA	0.882058	0.92043	1	NA	0	0	2	2	1	0	4	0	0	2
Firmicutes_Bacilli_Lactobacillales_Enterococcaceae	0.000154518	6.34199e-08	0.000112623	0.000200873	3.68581e-08	8.58582e-05	0.841	0.915487	0.590014	0.823471	0.88976	0.92043	0.461351	0.583474	5	0	0	0	15	2	10	0	11	3
Proteobacteria_Betaproteobacteria_Burkholderiales_Sutterellaceae	0.000177695	2.43234e-08	6.97472e-05	0.000154518	2.46218e-08	7.01738e-05	0.8782	0.915487	0.834035	0.916563	0.900847	0.92043	0.760772	0.760772	3	1	2	11	6	7	4	0	0	9
Bacteroidetes_Sphingobacteria_Sphingobacteriales_Chitinophagaceae	1.54518e-05	4.4767e-10	9.46224e-06	2.31777e-05	1.19379e-09	1.54518e-05	1	NA	0.904861	0.916563	0.953337	0.953337	1	NA	1	0	0	0	1	0	2	0	0	1
Unclassified_Other_Other_Other_Other	7.72589e-06	2.98447e-10	7.72589e-06	7.72589e-06	2.98447e-10	7.72589e-06	1	NA	1	NA	1	NA	1	NA	0	1	0	0	0	1	0	0	0	0
Actinobacteria_Actinobacteria_Other_Other	7.72589e-06	2.98447e-10	7.72589e-06	0	0	0	1	NA	0.423711	0.679916	1	NA	1	NA	0	1	0	0	0	0	0	0	0	0
Actinobacteria_Actinobacteria_Actinomycetales_Other	7.72589e-06	2.98447e-10	7.72589e-06	0	0	0	1	NA	0.423711	0.679916	1	NA	1	NA	0	0	0	1	0	0	0	0	0	0
Actinobacteria_Actinobacteria_Actinomycetales_Microbacteriaceae	0	0	0	7.72589e-06	2.98447e-10	7.72589e-06	1	NA	0.423711	0.679916	1	NA	1	NA	0	0	0	0	0	0	1	0	0	0
Actinobacteria_Actinobacteria_Actinomycetales_Propionibacteriaceae	0	0	0	7.72589e-06	2.98447e-10	7.72589e-06	1	NA	0.423711	0.679916	1	NA	1	NA	0	0	0	0	0	0	0	0	0	1
Actinobacteria_Actinobacteria_Bifidobacteriales_Bifidobacteriaceae	7.72589e-06	2.98447e-10	7.72589e-06	0	0	0	1	NA	0.423711	0.679916	1	NA	1	NA	0	1	0	0	0	0	0	0	0	0
Bacteroidetes_Bacteroidia_Bacteroidales_Prevotellaceae	7.72589e-06	2.98447e-10	7.72589e-06	0	0	0	1	NA	0.423711	0.679916	1	NA	1	NA	1	0	0	0	0	0	0	0	0	0
Proteobacteria_Alphaproteobacteria_Rhodobacterales_Rhodobacteraceae	0	0	0	7.72589e-06	2.98447e-10	7.72589e-06	1	NA	0.423711	0.679916	1	NA	1	NA	0	0	0	0	0	0	1	0	0	0
Proteobacteria_Betaproteobacteria_Other_Other	0	0	0	7.72589e-06	2.98447e-10	7.72589e-06	1	NA	0.423711	0.679916	1	NA	1	NA	0	0	0	0	0	0	1	0	0	0
Proteobacteria_Deltaproteobacteria_Other_Other	0	0	0	7.72589e-06	2.98447e-10	7.72589e-06	1	NA	0.423711	0.679916	1	NA	1	NA	0	0	0	0	0	0	0	0	0	1
Proteobacteria_Deltaproteobacteria_Bdellovibrionales_Other	0	0	0	7.72589e-06	2.98447e-10	7.72589e-06	1	NA	0.423711	0.679916	1	NA	1	NA	0	0	0	0	0	1	0	0	0	0
Proteobacteria_Gammaproteobacteria_Aeromonadales_Aeromonadaceae	0	0	0	7.72589e-06	2.98447e-10	7.72589e-06	1	NA	0.423711	0.679916	1	NA	1	NA	0	0	0	0	0	0	0	1	0	0
Proteobacteria_Gammaproteobacteria_Alteromonadales_Shewanellaceae	7.72589e-06	2.98447e-10	7.72589e-06	0	0	0	1	NA	0.423711	0.679916	1	NA	1	NA	1	0	0	0	0	0	0	0	0	0
Proteobacteria_Gammaproteobacteria_Vibrionales_Vibrionaceae	0	0	0	7.72589e-06	2.98447e-10	7.72589e-06	1	NA	0.423711	0.679916	1	NA	1	NA	0	0	0	0	0	0	1	0	0	0
Proteobacteria_Gammaproteobacteria_Xanthomonadales_Xanthomonadaceae	0	0	0	7.72589e-06	2.98447e-10	7.72589e-06	1	NA	0.423711	0.679916	1	NA	1	NA	0	0	0	0	0	1	0	0	0	0
Type_c_otu_table_even25887.genus	mean chronic_infected (n=5)	var_grp1	stderr_grp1	mean chronic_uninfected (n=5)	var_grp2	stderr_grp2	npdiff_p	npdiff_q	mannwhitney_p	mannwhitney_q	nbinom_p	nbinom_q	fishers_p	fishers_q	1.4	2.2	3.3	A0	A2	7.2	7.4	8.4	9	9.1
Firmicutes_Erysipelotrichia_Erysipelotrichales_Erysipelotrichaceae_Coprobacillus	0.00026268	1.48029e-07	0.000172064	0	0	0	0.4424	0.797541	0.179712	0.629463	2.20813e-08	1.63401e-06	1.16163e-10	5.00954e-10	22	0	0	0	12	0	0	0	0	0
Firmicutes_Clostridia_Clostridiales_Lachnospiraceae_Robinsoniella	0.00790358	0.000234911	0.00685436	0.000193147	3.58136e-08	8.46328e-05	0.3496	0.797541	0.672336	0.834037	2.79344e-07	1.03357e-05	4.11792e-209	5.68272e-208	104	0	0	9	910	3	2	0	8	12
Firmicutes_Clostridia_Clostridiales_Other_Other	0.0167497	0.000424462	0.0092137	0.00376251	6.07085e-06	0.00110189	0.4052	0.797541	0.916563	0.916563	0.00172683	0.0330014	1.43029e-235	2.46724e-234	1087	49	10	80	942	63	92	45	80	207
Other_Other_Other_Other_Other	0.00757909	6.74612e-05	0.00367318	0.00275814	1.45537e-06	0.000539514	0.376	0.797541	0.84127	0.905983	0.00192341	0.0330014	2.24091e-65	1.93278e-64	330	42	26	77	506	73	64	27	79	114
Firmicutes_Clostridia_Clostridiales_Ruminococcaceae_Pseudoflavonifractor	0.000324487	2.33982e-07	0.000216325	3.86294e-05	2.23835e-09	2.11582e-05	0.4532	0.797541	1	NA	0.00267457	0.0330014	2.45162e-08	9.95069e-08	14	0	0	0	28	1	0	0	3	1
Firmicutes_Clostridia_Clostridiales_Ruminococcaceae_Ruminococcus	0.0914359	0.0231492	0.068043	0.0101827	0.000101692	0.00450982	0.4104	0.797541	1	NA	0.00267579	0.0330014	0	0	2555	3	9	129	9139	67	162	7	585	497
Verrucomicrobia_Verrucomicrobiae_Verrucomicrobiales_Verrucomicrobiaceae_Akkermansia	0.00146019	1.0243e-05	0.00143129	0.000115888	2.08913e-08	6.46394e-05	0.8984	0.91389	0.913906	0.916563	0.00382595	0.0404457	8.5637e-34	5.37178e-33	186	0	1	2	0	0	2	0	4	9
Firmicutes_Erysipelotrichia_Erysipelotrichales_Erysipelotrichaceae_Turicibacter	0.0122146	0.000703167	0.0118589	0.00358481	4.29047e-06	0.000926333	0.9928	NA	0.222222	0.629463	0.00461067	0.0426487	1.6072e-135	1.58424e-134	1	0	8	1544	28	136	64	156	24	84
Firmicutes_Clostridia_Clostridiales_Ruminococcaceae_Oscillibacter	0.000154518	9.25184e-08	0.000136028	3.09035e-05	1.04456e-09	1.44538e-05	0.7954	0.90014	1	NA	0.00730934	0.060099	0.00154315	0.00507034	2	0	0	0	18	1	0	0	2	1
Proteobacteria_Betaproteobacteria_Burkholderiales_Burkholderiaceae_Cupriavidus	3.86294e-05	1.49223e-09	1.72756e-05	0.000162244	4.8796e-08	9.87887e-05	0.414	0.797541	0.744882	0.868508	0.00972781	0.0719858	0.00249273	0.00781809	2	1	0	0	2	7	13	0	0	1
Firmicutes_Bacilli_Lactobacillales_Lactobacillaceae_Lactobacillus	0.718252	0.031697	0.0796203	0.881361	0.00761308	0.0390207	0.128	0.797541	0.309524	0.629463	0.0163231	0.10981	0	0	19312	15900	24874	20214	12667	19236	21918	24141	24567	24217
Proteobacteria_Other_Other_Other_Other	0	0	0	4.63553e-05	2.5368e-09	2.25246e-05	0.1612	0.797541	0.0720057	0.629463	0.0351529	0.216776	0.0312482	0.0770045	0	0	0	0	0	2	3	0	0	1
Firmicutes_Clostridia_Clostridiales_Lachnospiraceae_Anaerostipes	8.49847e-05	7.75961e-09	3.93944e-05	0.000339939	2.09957e-07	0.000204918	0.4196	0.797541	0.829357	0.905983	0.0415038	0.231797	8.68132e-06	3.15269e-05	2	0	0	4	5	0	1	0	25	18
Firmicutes_Clostridia_Clostridiales_Eubacteriaceae_Eubacterium	0.00266543	1.4209e-05	0.00168577	0.000285858	2.02645e-07	0.000201318	0.442	0.797541	0.913906	0.916563	0.0459484	0.231797	1.11922e-55	7.72262e-55	207	0	0	0	138	4	1	0	4	28
Firmicutes_Clostridia_Clostridiales_Lachnospiraceae_Marvinbryantia	0.000903929	1.99332e-06	0.000631399	6.18071e-05	1.38778e-08	5.26835e-05	0.378	0.797541	0.433848	0.629463	0.0494348	0.231797	4.36617e-22	2.31743e-21	32	0	0	1	84	0	0	0	1	7
Bacteroidetes_Bacteroidia_Bacteroidales_Porphyromonadaceae_Other	0.00363117	3.37043e-05	0.00259632	0.000733959	7.20748e-07	0.00037967	0.3434	0.797541	0.401965	0.629463	0.050302	0.231797	6.70745e-56	5.14238e-55	356	2	1	84	27	0	10	0	46	39
Proteobacteria_Gammaproteobacteria_Pseudomonadales_Pseudomonadaceae_Pseudomonas	7.72589e-06	2.98447e-10	7.72589e-06	6.18071e-05	6.4166e-09	3.58235e-05	0.3014	0.797541	0.193816	0.629463	0.0532506	0.231797	0.0390592	0.0929341	1	0	0	0	0	2	5	0	0	1
Proteobacteria_Gammaproteobacteria_Other_Other_Other	0	0	0	3.86294e-05	4.4767e-09	2.99222e-05	0.4542	0.797541	0.179712	0.629463	0.0730482	0.293558	0.0624976	0.139108	0	0	0	0	0	1	4	0	0	0
Firmicutes_Other_Other_Other_Other	0.00659018	1.10788e-05	0.00148854	0.00343029	4.8314e-06	0.000982996	0.132	0.797541	0.222222	0.629463	0.0832413	0.293558	6.81029e-30	3.91591e-29	287	167	47	196	156	178	103	81	50	32
Proteobacteria_Betaproteobacteria_Burkholderiales_Comamonadaceae_Diaphorobacter	7.72589e-06	2.98447e-10	7.72589e-06	5.40812e-05	4.17825e-09	2.89076e-05	0.2796	0.797541	0.193816	0.629463	0.0837653	0.293558	0.0703083	0.142684	0	1	0	0	0	2	4	0	1	0
Proteobacteria_Betaproteobacteria_Burkholderiales_Burkholderiales_incertae_sedis_Aquabacterium	0.000200873	2.9397e-08	7.66772e-05	0.000556264	6.82398e-07	0.000369431	0.5536	0.800995	0.753298	0.868508	0.085553	0.293558	3.6736e-06	1.40821e-05	1	0	7	8	10	11	52	0	4	5
Firmicutes_Clostridia_Clostridiales_Lachnospiraceae_Blautia	5.40812e-05	5.67048e-09	3.36764e-05	7.72589e-06	2.98447e-10	7.72589e-06	0.4482	0.797541	0.440686	0.629463	0.087274	0.293558	0.0703083	0.142684	3	0	0	0	4	0	0	0	0	1
Firmicutes_Clostridia_Other_Other_Other	0.000115888	8.20728e-09	4.05149e-05	4.63553e-05	1.04456e-09	1.44538e-05	0.1894	0.797541	0.336745	0.629463	0.0993562	0.319668	0.0783419	0.154445	5	4	0	1	5	1	2	1	0	2
Firmicutes_Clostridia_Clostridiales_Lachnospiraceae_Moryella	0.000594893	7.64471e-07	0.000391017	0.000100437	2.8054e-08	7.49052e-05	0.3038	0.797541	0.330547	0.629463	0.121985	0.373851	3.15049e-12	1.44922e-11	52	0	1	1	23	0	3	0	0	10
Proteobacteria_Betaproteobacteria_Burkholderiales_Alcaligenaceae_Achromobacter	0	0	0	3.09035e-05	4.77514e-09	3.09035e-05	1	NA	0.423711	0.629463	0.126301	0.373851	0.124997	0.221149	0	0	0	0	0	4	0	0	0	0
Firmicutes_Clostridia_Clostridiales_Lachnospiraceae_Shuttleworthia	3.09035e-05	2.5368e-09	2.25246e-05	0	0	0	0.4314	0.797541	0.179712	0.629463	0.131377	0.37392	0.124997	0.221149	3	0	0	0	1	0	0	0	0	0
Bacteroidetes_Bacteroidia_Bacteroidales_Porphyromonadaceae_Barnesiella	0.000386294	1.61161e-07	0.000179533	0.000162244	2.41742e-08	6.9533e-05	0.285	0.797541	0.387094	0.629463	0.175229	0.480257	0.000765512	0.00264102	24	0	0	10	16	0	9	0	6	6
Proteobacteria_Gammaproteobacteria_Pseudomonadales_Moraxellaceae_Acinetobacter	1.54518e-05	1.19379e-09	1.54518e-05	0.000100437	1.46239e-08	5.40812e-05	0.2878	0.797541	0.237504	0.629463	0.194894	0.499518	0.00738364	0.0203789	0	0	0	2	0	6	6	0	0	1
Bacteroidetes_Bacteroidia_Bacteroidales_Other_Other	0.00321397	1.53173e-05	0.00175028	0.00145247	1.67921e-06	0.000579519	0.3974	0.797541	0.463344	0.648681	0.195908	0.499518	2.30249e-20	1.1348e-19	248	1	0	73	94	4	67	0	48	69
Proteobacteria_Alphaproteobacteria_Caulobacterales_Caulobacteraceae_Brevundimonas	3.09035e-05	1.04456e-09	1.44538e-05	7.72589e-05	1.71607e-08	5.85844e-05	0.8576	0.912326	1	NA	0.209934	0.499518	0.179554	0.302176	0	1	2	0	1	1	8	0	0	1
Bacteroidetes_Other_Other_Other_Other	6.9533e-05	2.5368e-09	2.25246e-05	2.31777e-05	1.19379e-09	1.54518e-05	0.2002	0.797541	0.157163	0.629463	0.226427	0.499518	0.145987	0.251827	2	0	1	3	3	0	2	0	1	0
Firmicutes_Bacilli_Lactobacillales_Streptococcaceae_Streptococcus	3.86294e-05	2.98447e-09	2.44314e-05	7.72589e-06	2.98447e-10	7.72589e-06	0.4408	0.797541	0.440686	0.629463	0.226941	0.499518	0.218745	0.343031	3	0	0	2	0	0	0	0	0	1
Firmicutes_Bacilli_Bacillales_Bacillaceae_Bacillus	0	0	0	2.31777e-05	2.68602e-09	2.31777e-05	1	NA	0.423711	0.629463	0.229508	0.499518	0.249997	0.359371	0	0	0	0	0	0	3	0	0	0
Firmicutes_Bacilli_Bacillales_Planococcaceae_Other	0	0	0	2.31777e-05	2.68602e-09	2.31777e-05	1	NA	0.423711	0.629463	0.229508	0.499518	0.249997	0.359371	0	0	0	0	0	0	0	0	0	3
Bacteroidetes_Bacteroidia_Bacteroidales_Porphyromonadaceae_Parabacteroides	2.31777e-05	1.19379e-09	1.54518e-05	0	0	0	0.4494	0.797541	0.179712	0.629463	0.248763	0.511347	0.249997	0.359371	1	0	0	0	2	0	0	0	0	0
Deferribacteres_Deferribacteres_Deferribacterales_Deferribacteraceae_Mucispirillum	0	0	0	2.31777e-05	1.19379e-09	1.54518e-05	0.437	0.797541	0.179712	0.629463	0.248763	0.511347	0.249997	0.359371	0	0	0	0	0	1	2	0	0	0
Firmicutes_Bacilli_Bacillales_Staphylococcaceae_Staphylococcus	0.000123614	4.77514e-09	3.09035e-05	0.000193147	2.31296e-08	6.80141e-05	0.458	0.797541	0.594729	0.764236	0.26358	0.527161	0.210987	0.338561	3	5	2	5	1	3	2	2	7	11
Firmicutes_Clostridia_Clostridiales_Ruminococcaceae_Other	0.000100437	1.98467e-08	6.30027e-05	3.09035e-05	2.5368e-09	2.25246e-05	0.5056	0.800995	0.325789	0.629463	0.290486	0.565683	0.0490345	0.112779	1	0	1	2	9	0	1	0	0	3
Firmicutes_Clostridia_Clostridiales_Clostridiaceae_Clostridium	0.0846139	0.0259908	0.0720982	0.0293275	0.001954	0.0197687	0.6648	0.830576	0.690476	0.845833	0.303711	0.576272	0	0	467	9634	790	12	49	2668	993	5	6	124
Proteobacteria_Betaproteobacteria_Burkholderiales_Comamonadaceae_Acidovorax	9.27106e-05	6.4166e-09	3.58235e-05	0.000169969	3.32768e-08	8.15804e-05	0.4446	0.797541	0.75183	0.868508	0.314379	0.581601	0.121425	0.221149	0	1	4	2	5	10	9	1	2	0
Proteobacteria_Betaproteobacteria_Burkholderiales_Oxalobacteraceae_Herbaspirillum	0.000494457	1.21915e-07	0.000156151	0.000795766	5.1676e-07	0.000321484	0.429	0.797541	0.753298	0.868508	0.326045	0.582153	0.00314799	0.00944396	16	0	11	12	25	37	44	3	7	12
Actinobacteria_Actinobacteria_Coriobacteriales_Coriobacteriaceae_Enterorhabdus	0.000417198	3.45004e-07	0.00026268	0.000231777	4.10364e-08	9.0594e-05	0.669	0.830576	1	NA	0.330411	0.582153	0.011621	0.0296982	14	0	0	4	36	2	13	0	6	9
Proteobacteria_Gammaproteobacteria_Enterobacteriales_Enterobacteriaceae_Escherichia-Shigella	3.09035e-05	1.04456e-09	1.44538e-05	6.18071e-05	3.43214e-09	2.61998e-05	0.5258	0.800995	0.443194	0.629463	0.395163	0.66203	0.387684	0.545923	0	0	1	1	2	4	2	1	0	1
Actinobacteria_Actinobacteria_Actinomycetales_Micrococcaceae_Micrococcus	0	0	0	1.54518e-05	1.19379e-09	1.54518e-05	1	NA	0.423711	0.629463	0.444444	0.66203	0.499998	0.565572	0	0	0	0	0	0	2	0	0	0
Firmicutes_Clostridia_Clostridiales_Lachnospiraceae_Lactonifactor	1.54518e-05	1.19379e-09	1.54518e-05	0	0	0	1	NA	0.423711	0.629463	0.444444	0.66203	0.499998	0.565572	0	0	0	0	2	0	0	0	0	0
Firmicutes_Erysipelotrichia_Erysipelotrichales_Erysipelotrichaceae_Other	1.54518e-05	1.19379e-09	1.54518e-05	0	0	0	1	NA	0.423711	0.629463	0.444444	0.66203	0.499998	0.565572	2	0	0	0	0	0	0	0	0	0
Proteobacteria_Betaproteobacteria_Burkholderiales_Burkholderiaceae_Limnobacter	1.54518e-05	1.19379e-09	1.54518e-05	0	0	0	1	NA	0.423711	0.629463	0.444444	0.66203	0.499998	0.565572	0	0	0	0	2	0	0	0	0	0
Proteobacteria_Betaproteobacteria_Neisseriales_Neisseriaceae_Neisseria	0	0	0	1.54518e-05	1.19379e-09	1.54518e-05	1	NA	0.423711	0.629463	0.444444	0.66203	0.499998	0.565572	0	0	0	0	0	0	2	0	0	0
Proteobacteria_Deltaproteobacteria_Bdellovibrionales_Bacteriovoracaceae_Bacteriovorax	1.54518e-05	1.19379e-09	1.54518e-05	0	0	0	1	NA	0.423711	0.629463	0.444444	0.66203	0.499998	0.565572	0	0	0	0	2	0	0	0	0	0
Firmicutes_Bacilli_Other_Other_Other	0.00106617	8.80865e-07	0.00041973	0.000849847	1.1714e-07	0.000153062	0.7666	0.886851	1	NA	0.447318	0.66203	0.0862859	0.165381	20	11	31	68	8	32	20	17	11	30
Proteobacteria_Betaproteobacteria_Burkholderiales_Oxalobacteraceae_Herminiimonas	5.40812e-05	1.01472e-08	4.50493e-05	3.09035e-05	1.04456e-09	1.44538e-05	0.962	0.962	0.821222	0.905983	0.493707	0.685185	0.548819	0.601088	0	0	0	1	6	2	1	0	1	0
Bacteroidetes_Flavobacteria_Flavobacteriales_Flavobacteriaceae_Cloacibacterium	0	0	0	1.54518e-05	4.4767e-10	9.46224e-06	0.4494	0.797541	0.177016	0.629463	0.5	0.685185	0.499998	0.565572	0	0	0	0	0	0	1	0	0	1
Firmicutes_Bacilli_Lactobacillales_Carnobacteriaceae_Atopostipes	0	0	0	1.54518e-05	4.4767e-10	9.46224e-06	0.4596	0.797541	0.177016	0.629463	0.5	0.685185	0.499998	0.565572	0	0	0	0	0	1	0	0	0	1
Proteobacteria_Alphaproteobacteria_Rhizobiales_Hyphomicrobiaceae_Devosia	0	0	0	1.54518e-05	4.4767e-10	9.46224e-06	0.4462	0.797541	0.177016	0.629463	0.5	0.685185	0.499998	0.565572	0	0	0	0	0	1	1	0	0	0
Actinobacteria_Actinobacteria_Coriobacteriales_Coriobacteriaceae_Other	0.000502183	3.36498e-07	0.000259422	0.000347665	8.72956e-08	0.000132133	0.6762	0.830576	0.916563	0.916563	0.524922	0.706259	0.069506	0.142684	16	0	1	11	37	3	13	0	10	19
Proteobacteria_Betaproteobacteria_Burkholderiales_Oxalobacteraceae_Massilia	0.000540812	4.42447e-07	0.000297472	0.000834396	6.9732e-07	0.000373449	0.6522	0.830576	0.753298	0.868508	0.595095	0.748794	0.00538521	0.0154825	5	0	6	16	43	44	45	0	4	15
Proteobacteria_Betaproteobacteria_Burkholderiales_Other_Other	0.000108162	7.01349e-09	3.74526e-05	0.000146792	1.74591e-08	5.90917e-05	0.6522	0.830576	0.671373	0.834037	0.606886	0.748794	0.486822	0.565572	5	0	1	4	4	8	7	1	1	2
Bacteroidetes_Bacteroidia_Bacteroidales_Bacteroidaceae_Bacteroides	2.31777e-05	4.4767e-10	9.46224e-06	7.72589e-06	2.98447e-10	7.72589e-06	0.518	0.800995	0.270344	0.629463	0.625	0.748794	0.624997	0.663458	1	1	0	0	1	0	0	0	1	0
Firmicutes_Bacilli_Bacillales_Other_Other	7.72589e-06	2.98447e-10	7.72589e-06	2.31777e-05	4.4767e-10	9.46224e-06	0.5254	0.800995	0.270344	0.629463	0.625	0.748794	0.624997	0.663458	0	0	0	1	0	1	1	0	0	1
Firmicutes_Clostridia_Clostridiales_Eubacteriaceae_Anaerofustis	3.09035e-05	2.5368e-09	2.25246e-05	1.54518e-05	4.4767e-10	9.46224e-06	0.8814	0.912326	0.904861	0.916563	0.629229	0.748794	0.687496	0.697607	3	0	0	0	1	0	0	0	1	1
Firmicutes_Bacilli_Lactobacillales_Other_Other	0.000571716	5.99878e-08	0.000109533	0.000641249	1.68622e-08	5.80728e-05	0.6138	0.830576	0.344267	0.629463	0.630102	0.748794	0.523175	0.582243	11	11	25	17	10	12	18	21	17	15
Firmicutes_Clostridia_Clostridiales_Clostridiaceae_Other	0.0312203	0.00289217	0.0240506	0.0521266	0.0024741	0.0222446	0.5332	0.800995	0.547619	0.725225	0.641048	0.748794	6.17107e-156	7.09673e-155	102	43	8	3257	631	3146	1972	1376	238	15
Firmicutes_Clostridia_Clostridiales_Ruminococcaceae_Flavonifractor	0.000108162	1.6713e-08	5.78152e-05	5.40812e-05	1.01472e-08	4.50493e-05	0.5702	0.800995	0.503812	0.685745	0.647154	0.748794	0.189229	0.310876	4	0	0	2	8	0	0	0	1	6
Proteobacteria_Betaproteobacteria_Burkholderiales_Oxalobacteraceae_Other	8.49847e-05	2.5368e-09	2.25246e-05	6.18071e-05	1.19379e-09	1.54518e-05	0.5612	0.800995	0.380836	0.629463	0.647606	0.748794	0.647594	0.67703	3	0	2	3	3	1	2	1	1	3
Firmicutes_Clostridia_Clostridiales_Lachnospiraceae_Dorea	3.86294e-05	2.98447e-09	2.44314e-05	1.54518e-05	1.19379e-09	1.54518e-05	0.7202	0.849836	0.518605	0.696209	0.703185	0.80055	0.453119	0.565572	3	0	0	0	2	0	0	0	2	0
Firmicutes_Clostridia_Clostridiales_Lachnospiraceae_Other	0.00401746	3.37685e-05	0.00259879	0.00338394	1.19234e-05	0.00154424	0.8086	0.90014	1	NA	0.75834	0.85026	0.00874547	0.0232091	350	3	8	11	148	94	98	0	19	227
Proteobacteria_Betaproteobacteria_Burkholderiales_Comamonadaceae_Other	1.54518e-05	4.4767e-10	9.46224e-06	2.31777e-05	2.68602e-09	2.31777e-05	1	NA	0.796253	0.897961	0.805823	0.890013	1	NA	0	0	0	1	1	0	3	0	0	0
Proteobacteria_Alphaproteobacteria_Rhizobiales_Bartonellaceae_Bartonella	2.31777e-05	1.19379e-09	1.54518e-05	3.09035e-05	4.77514e-09	3.09035e-05	1	NA	0.79717	0.897961	0.825372	0.898199	1	NA	0	0	2	1	0	0	4	0	0	0
Firmicutes_Bacilli_Lactobacillales_Enterococcaceae_Enterococcus	0.000154518	6.34199e-08	0.000112623	0.000200873	3.68581e-08	8.58582e-05	0.8436	0.912326	0.590014	0.764236	0.88976	0.94597	0.461351	0.565572	5	0	0	0	15	2	10	0	11	3
Proteobacteria_Betaproteobacteria_Burkholderiales_Sutterellaceae_Parasutterella	0.000177695	2.43234e-08	6.97472e-05	0.000154518	2.46218e-08	7.01738e-05	0.8706	0.912326	0.834035	0.905983	0.900847	0.94597	0.760772	0.760772	3	1	2	11	6	7	4	0	0	9
Proteobacteria_Alphaproteobacteria_Sphingomonadales_Sphingomonadaceae_Other	3.09035e-05	1.04456e-09	1.44538e-05	1.54518e-05	1.19379e-09	1.54518e-05	0.6898	0.830576	0.406483	0.629463	0.90762	0.94597	0.687496	0.697607	0	0	2	1	1	0	2	0	0	0
Bacteroidetes_Sphingobacteria_Sphingobacteriales_Chitinophagaceae_Other	1.54518e-05	4.4767e-10	9.46224e-06	2.31777e-05	1.19379e-09	1.54518e-05	1	NA	0.904861	0.916563	0.953337	0.969988	1	NA	1	0	0	0	1	0	2	0	0	1
Firmicutes_Clostridia_Clostridiales_Lachnospiraceae_Roseburia	2.31777e-05	2.68602e-09	2.31777e-05	1.54518e-05	1.19379e-09	1.54518e-05	1	NA	1	NA	0.960384	0.969988	1	NA	3	0	0	0	0	0	0	0	0	2
Firmicutes_Bacilli_Lactobacillales_Lactobacillaceae_Other	3.86294e-05	2.98447e-09	2.44314e-05	3.09035e-05	1.79068e-09	1.89245e-05	1	NA	0.904861	0.916563	0.969988	0.969988	1	NA	3	2	0	0	0	0	0	0	2	2
Unclassified_Other_Other_Other_Other_Other	7.72589e-06	2.98447e-10	7.72589e-06	7.72589e-06	2.98447e-10	7.72589e-06	1	NA	1	NA	1	NA	1	NA	0	1	0	0	0	1	0	0	0	0
Actinobacteria_Actinobacteria_Other_Other_Other	7.72589e-06	2.98447e-10	7.72589e-06	0	0	0	1	NA	0.423711	0.629463	1	NA	1	NA	0	1	0	0	0	0	0	0	0	0
Actinobacteria_Actinobacteria_Actinomycetales_Other_Other	7.72589e-06	2.98447e-10	7.72589e-06	0	0	0	1	NA	0.423711	0.629463	1	NA	1	NA	0	0	0	1	0	0	0	0	0	0
Actinobacteria_Actinobacteria_Actinomycetales_Microbacteriaceae_Agrococcus	0	0	0	7.72589e-06	2.98447e-10	7.72589e-06	1	NA	0.423711	0.629463	1	NA	1	NA	0	0	0	0	0	0	1	0	0	0
Actinobacteria_Actinobacteria_Actinomycetales_Micrococcaceae_Rothia	0	0	0	7.72589e-06	2.98447e-10	7.72589e-06	1	NA	0.423711	0.629463	1	NA	1	NA	0	0	0	0	0	0	1	0	0	0
Actinobacteria_Actinobacteria_Actinomycetales_Propionibacteriaceae_Propionibacterium	0	0	0	7.72589e-06	2.98447e-10	7.72589e-06	1	NA	0.423711	0.629463	1	NA	1	NA	0	0	0	0	0	0	0	0	0	1
Actinobacteria_Actinobacteria_Bifidobacteriales_Bifidobacteriaceae_Bifidobacterium	7.72589e-06	2.98447e-10	7.72589e-06	0	0	0	1	NA	0.423711	0.629463	1	NA	1	NA	0	1	0	0	0	0	0	0	0	0
Bacteroidetes_Bacteroidia_Bacteroidales_Prevotellaceae_Prevotella	7.72589e-06	2.98447e-10	7.72589e-06	0	0	0	1	NA	0.423711	0.629463	1	NA	1	NA	1	0	0	0	0	0	0	0	0	0
Bacteroidetes_Flavobacteria_Flavobacteriales_Flavobacteriaceae_Other	7.72589e-06	2.98447e-10	7.72589e-06	0	0	0	1	NA	0.423711	0.629463	1	NA	1	NA	0	0	1	0	0	0	0	0	0	0
Bacteroidetes_Flavobacteria_Flavobacteriales_Flavobacteriaceae_Chryseobacterium	0	0	0	7.72589e-06	2.98447e-10	7.72589e-06	1	NA	0.423711	0.629463	1	NA	1	NA	0	0	0	0	0	0	0	0	0	1
Bacteroidetes_Flavobacteria_Flavobacteriales_Flavobacteriaceae_Flavobacterium	3.09035e-05	1.04456e-09	1.44538e-05	2.31777e-05	2.68602e-09	2.31777e-05	1	NA	0.47848	0.660437	1	NA	1	NA	0	0	1	2	1	0	3	0	0	0
Firmicutes_Bacilli_Bacillales_Bacillaceae_Other	7.72589e-06	2.98447e-10	7.72589e-06	0	0	0	1	NA	0.423711	0.629463	1	NA	1	NA	0	1	0	0	0	0	0	0	0	0
Firmicutes_Bacilli_Bacillales_Planococcaceae_Psychrobacillus	7.72589e-06	2.98447e-10	7.72589e-06	7.72589e-06	2.98447e-10	7.72589e-06	1	NA	1	NA	1	NA	1	NA	0	0	0	0	1	0	1	0	0	0
Firmicutes_Clostridia_Clostridiales_Lachnospiraceae_Butyrivibrio	7.72589e-06	2.98447e-10	7.72589e-06	0	0	0	1	NA	0.423711	0.629463	1	NA	1	NA	1	0	0	0	0	0	0	0	0	0
Firmicutes_Clostridia_Clostridiales_Ruminococcaceae_Anaerotruncus	7.72589e-06	2.98447e-10	7.72589e-06	7.72589e-06	2.98447e-10	7.72589e-06	1	NA	1	NA	1	NA	1	NA	0	0	0	0	1	0	0	0	0	1
Firmicutes_Clostridia_Clostridiales_Ruminococcaceae_Faecalibacterium	7.72589e-06	2.98447e-10	7.72589e-06	0	0	0	1	NA	0.423711	0.629463	1	NA	1	NA	0	0	0	0	1	0	0	0	0	0
Proteobacteria_Alphaproteobacteria_Caulobacterales_Caulobacteraceae_Other	7.72589e-06	2.98447e-10	7.72589e-06	0	0	0	1	NA	0.423711	0.629463	1	NA	1	NA	0	0	1	0	0	0	0	0	0	0
Proteobacteria_Alphaproteobacteria_Caulobacterales_Caulobacteraceae_Phenylobacterium	0	0	0	7.72589e-06	2.98447e-10	7.72589e-06	1	NA	0.423711	0.629463	1	NA	1	NA	0	0	0	0	0	0	1	0	0	0
Proteobacteria_Alphaproteobacteria_Rhizobiales_Hyphomicrobiaceae_Other	0	0	0	7.72589e-06	2.98447e-10	7.72589e-06	1	NA	0.423711	0.629463	1	NA	1	NA	0	0	0	0	0	0	1	0	0	0
Proteobacteria_Alphaproteobacteria_Rhodobacterales_Rhodobacteraceae_Labrenzia	0	0	0	7.72589e-06	2.98447e-10	7.72589e-06	1	NA	0.423711	0.629463	1	NA	1	NA	0	0	0	0	0	0	1	0	0	0
Proteobacteria_Alphaproteobacteria_Sphingomonadales_Sphingomonadaceae_Sphingobium	7.72589e-06	2.98447e-10	7.72589e-06	7.72589e-06	2.98447e-10	7.72589e-06	1	NA	1	NA	1	NA	1	NA	1	0	0	0	0	0	0	0	0	1
Proteobacteria_Betaproteobacteria_Other_Other_Other	0	0	0	7.72589e-06	2.98447e-10	7.72589e-06	1	NA	0.423711	0.629463	1	NA	1	NA	0	0	0	0	0	0	1	0	0	0
Proteobacteria_Betaproteobacteria_Burkholderiales_Burkholderiaceae_Ralstonia	0	0	0	7.72589e-06	2.98447e-10	7.72589e-06	1	NA	0.423711	0.629463	1	NA	1	NA	0	0	0	0	0	1	0	0	0	0
Proteobacteria_Betaproteobacteria_Burkholderiales_Burkholderiales_incertae_sedis_Leptothrix	7.72589e-06	2.98447e-10	7.72589e-06	0	0	0	1	NA	0.423711	0.629463	1	NA	1	NA	0	0	0	0	1	0	0	0	0	0
Proteobacteria_Betaproteobacteria_Burkholderiales_Comamonadaceae_Comamonas	7.72589e-06	2.98447e-10	7.72589e-06	0	0	0	1	NA	0.423711	0.629463	1	NA	1	NA	0	0	0	0	1	0	0	0	0	0
Proteobacteria_Betaproteobacteria_Burkholderiales_Comamonadaceae_Hydrogenophaga	7.72589e-06	2.98447e-10	7.72589e-06	1.54518e-05	4.4767e-10	9.46224e-06	1	NA	0.600471	0.764236	1	NA	1	NA	0	0	0	0	1	1	0	0	1	0
Proteobacteria_Betaproteobacteria_Burkholderiales_Comamonadaceae_Limnohabitans	0	0	0	7.72589e-06	2.98447e-10	7.72589e-06	1	NA	0.423711	0.629463	1	NA	1	NA	0	0	0	0	0	0	1	0	0	0
Proteobacteria_Betaproteobacteria_Neisseriales_Neisseriaceae_Vogesella	0	0	0	7.72589e-06	2.98447e-10	7.72589e-06	1	NA	0.423711	0.629463	1	NA	1	NA	0	0	0	0	0	0	0	0	0	1
Proteobacteria_Deltaproteobacteria_Other_Other_Other	0	0	0	7.72589e-06	2.98447e-10	7.72589e-06	1	NA	0.423711	0.629463	1	NA	1	NA	0	0	0	0	0	0	0	0	0	1
Proteobacteria_Deltaproteobacteria_Bdellovibrionales_Other_Other	0	0	0	7.72589e-06	2.98447e-10	7.72589e-06	1	NA	0.423711	0.629463	1	NA	1	NA	0	0	0	0	0	1	0	0	0	0
Proteobacteria_Deltaproteobacteria_Bdellovibrionales_Bacteriovoracaceae_Peredibacter	0	0	0	7.72589e-06	2.98447e-10	7.72589e-06	1	NA	0.423711	0.629463	1	NA	1	NA	0	0	0	0	0	0	1	0	0	0
Proteobacteria_Gammaproteobacteria_Aeromonadales_Aeromonadaceae_Aeromonas	0	0	0	7.72589e-06	2.98447e-10	7.72589e-06	1	NA	0.423711	0.629463	1	NA	1	NA	0	0	0	0	0	0	0	1	0	0
Proteobacteria_Gammaproteobacteria_Alteromonadales_Shewanellaceae_Shewanella	7.72589e-06	2.98447e-10	7.72589e-06	0	0	0	1	NA	0.423711	0.629463	1	NA	1	NA	1	0	0	0	0	0	0	0	0	0
Proteobacteria_Gammaproteobacteria_Enterobacteriales_Enterobacteriaceae_Proteus	7.72589e-06	2.98447e-10	7.72589e-06	0	0	0	1	NA	0.423711	0.629463	1	NA	1	NA	0	0	0	1	0	0	0	0	0	0
Proteobacteria_Gammaproteobacteria_Vibrionales_Vibrionaceae_Vibrio	0	0	0	7.72589e-06	2.98447e-10	7.72589e-06	1	NA	0.423711	0.629463	1	NA	1	NA	0	0	0	0	0	0	1	0	0	0
Proteobacteria_Gammaproteobacteria_Xanthomonadales_Xanthomonadaceae_Pseudoxanthomonas	0	0	0	7.72589e-06	2.98447e-10	7.72589e-06	1	NA	0.423711	0.629463	1	NA	1	NA	0	0	0	0	0	1	0	0	0	0
Type_c_otu_table_even25887.species	mean chronic_infected (n=5)	var_grp1	stderr_grp1	mean chronic_uninfected (n=5)	var_grp2	stderr_grp2	npdiff_p	npdiff_q	mannwhitney_p	mannwhitney_q	nbinom_p	nbinom_q	fishers_p	fishers_q	1.4	2.2	3.3	A0	A2	7.2	7.4	8.4	9	9.1
Firmicutes_Bacilli_Lactobacillales_Lactobacillaceae_Lactobacillus_Lactobacillus_johnsonii	0.0783559	0.0304717	0.0780663	0.000139066	6.4166e-09	3.58235e-05	0.147	0.764776	0.288844	0.618272	2.11617e-142	2.2643e-140	0	0	7	10112	16	3	4	5	4	0	4	5
Firmicutes_Clostridia_Clostridiales_Eubacteriaceae_Eubacterium_Other	0.00122842	2.92806e-06	0.000765253	2.31777e-05	4.4767e-10	9.46224e-06	0.4366	0.764776	1	NA	3.01246e-31	1.61166e-29	3.88789e-34	2.59192e-33	91	0	0	0	68	1	0	0	1	1
Firmicutes_Clostridia_Clostridiales_Eubacteriaceae_Eubacterium_Eubacterium_dolichum	0.000726233	1.70592e-06	0.00058411	3.09035e-05	1.04456e-09	1.44538e-05	0.439	0.764776	1	NA	9.49951e-17	3.38816e-15	2.34215e-23	1.30119e-22	78	0	0	0	16	2	1	0	1	0
Firmicutes_Clostridia_Clostridiales_Clostridiaceae_Clostridium_Clostridium_piliforme	0	0	0	0.000556264	1.54715e-06	0.000556264	1	NA	0.423711	0.618272	1.70013e-16	4.54785e-15	4.19354e-22	2.18309e-21	0	0	0	0	0	0	0	0	0	72
Firmicutes_Clostridia_Clostridiales_Eubacteriaceae_Eubacterium_Eubacterium_uniforme	0.000424924	4.95421e-07	0.000314777	0	0	0	0.4514	0.764776	0.179712	0.618272	6.70841e-13	1.4356e-11	5.51936e-17	2.5088e-16	13	0	0	0	42	0	0	0	0	0
Firmicutes_Erysipelotrichia_Erysipelotrichales_Erysipelotrichaceae_Coprobacillus_Coprobacillus_cateniformis	0.00026268	1.48029e-07	0.000172064	0	0	0	0.4428	0.764776	0.179712	0.618272	2.20813e-08	3.93782e-07	1.16163e-10	4.46782e-10	22	0	0	0	12	0	0	0	0	0
Firmicutes_Clostridia_Clostridiales_Lachnospiraceae_Robinsoniella_Robinsoniella_peoriensis	0.00790358	0.000234911	0.00685436	0.000193147	3.58136e-08	8.46328e-05	0.3326	0.764776	0.672336	0.788066	2.79344e-07	4.26997e-06	4.11792e-209	5.14739e-208	104	0	0	9	910	3	2	0	8	12
Firmicutes_Clostridia_Clostridiales_Clostridiaceae_Clostridium_Clostridium_saccharogumia	0.000169969	1.2878e-07	0.000160487	0	0	0	0.447	0.764776	0.179712	0.618272	1.19501e-05	0.000159832	4.76412e-07	1.58804e-06	21	0	0	0	1	0	0	0	0	0
Firmicutes_Clostridia_Clostridiales_Eubacteriaceae_Eubacterium_Eubacterium_pyruvativorans	0.00013134	3.40229e-08	8.24899e-05	0	0	0	0.4524	0.764776	0.179712	0.618272	0.000115527	0.00137349	1.52508e-05	4.62145e-05	10	0	0	0	7	0	0	0	0	0
Firmicutes_Clostridia_Clostridiales_Clostridiaceae_Clostridium_Clostridium_cocleatum	0.000417198	7.91928e-07	0.000397977	2.31777e-05	1.19379e-09	1.54518e-05	0.7282	0.856783	0.651308	0.781538	0.000219181	0.00234524	4.26905e-13	1.77877e-12	52	0	0	1	1	0	2	0	1	0
Firmicutes_Clostridia_Clostridiales_Other_Other_Other	0.0167497	0.000424462	0.0092137	0.00376251	6.07085e-06	0.00110189	0.4008	0.764776	0.916563	0.916563	0.00172683	0.0158614	1.43029e-235	2.04327e-234	1087	49	10	80	942	63	92	45	80	207
Other_Other_Other_Other_Other_Other	0.00757909	6.74612e-05	0.00367318	0.00275814	1.45537e-06	0.000539514	0.363	0.764776	0.84127	0.891123	0.00192341	0.0158614	2.24091e-65	1.86742e-64	330	42	26	77	506	73	64	27	79	114
Firmicutes_Clostridia_Clostridiales_Ruminococcaceae_Ruminococcus_Ruminococcus_gnavus	0.0903233	0.0227665	0.0674781	0.00972689	8.92142e-05	0.00422408	0.3936	0.764776	1	NA	0.00192708	0.0158614	0	0	2488	3	9	127	9064	67	162	7	544	479
Firmicutes_Clostridia_Clostridiales_Ruminococcaceae_Pseudoflavonifractor_Pseudoflavonifractor_capillosus	0.000324487	2.33982e-07	0.000216325	3.86294e-05	2.23835e-09	2.11582e-05	0.4538	0.764776	1	NA	0.00267457	0.0201752	2.45162e-08	8.45386e-08	14	0	0	0	28	1	0	0	3	1
Firmicutes_Bacilli_Lactobacillales_Lactobacillaceae_Lactobacillus_Lactobacillus_murinus	0.196492	0.0319073	0.079884	0.670576	0.0736559	0.121372	0.0146	0.764776	0.015873	0.618272	0.0028283	0.0201752	0	0	3783	1723	13145	2435	4347	14800	20655	22625	22552	6164
Verrucomicrobia_Verrucomicrobiae_Verrucomicrobiales_Verrucomicrobiaceae_Akkermansia_Akkermansia_muciniphila	0.00146019	1.0243e-05	0.00143129	0.000115888	2.08913e-08	6.46394e-05	0.907	0.93275	0.913906	0.916563	0.00382595	0.025586	8.5637e-34	5.35231e-33	186	0	1	2	0	0	2	0	4	9
Firmicutes_Erysipelotrichia_Erysipelotrichales_Erysipelotrichaceae_Turicibacter_Turicibacter_sanguinis	0.0122146	0.000703167	0.0118589	0.00358481	4.29047e-06	0.000926333	0.991	NA	0.222222	0.618272	0.00461067	0.0290201	1.6072e-135	1.6072e-134	1	0	8	1544	28	136	64	156	24	84
Firmicutes_Bacilli_Lactobacillales_Lactobacillaceae_Lactobacillus_Lactobacillus_gasseri	7.72589e-05	2.98447e-08	7.72589e-05	0	0	0	1	NA	0.423711	0.618272	0.0051621	0.0306858	0.00195279	0.0054244	0	10	0	0	0	0	0	0	0	0
Firmicutes_Clostridia_Clostridiales_Ruminococcaceae_Oscillibacter_Oscillibacter_valericigenes	0.000154518	9.25184e-08	0.000136028	3.09035e-05	1.04456e-09	1.44538e-05	0.7992	0.8856	1	NA	0.00730934	0.0411631	0.00154315	0.00440899	2	0	0	0	18	1	0	0	2	1
Firmicutes_Bacilli_Lactobacillales_Lactobacillaceae_Lactobacillus_Lactobacillus_animalis	0.00117433	1.12037e-06	0.000473364	0.00354618	2.30729e-06	0.000679307	0.0368	0.764776	0.0361451	0.618272	0.00888441	0.0475316	2.81391e-35	2.00993e-34	29	11	78	17	17	75	122	102	128	32
Proteobacteria_Betaproteobacteria_Burkholderiales_Burkholderiaceae_Cupriavidus_Cupriavidus_gilardii	3.86294e-05	1.49223e-09	1.72756e-05	0.000162244	4.8796e-08	9.87887e-05	0.4236	0.764776	0.744882	0.854933	0.00972781	0.0495655	0.00249273	0.0067371	2	1	0	0	2	7	13	0	0	1
Firmicutes_Clostridia_Clostridiales_Clostridiaceae_Clostridium_Clostridium_disporicum	0.057836	0.0155264	0.0557251	0.00400201	3.10016e-05	0.00249004	0.7314	0.856783	0.524518	0.688129	0.0110368	0.0536792	0	0	1	7265	217	2	1	219	298	0	0	1
Proteobacteria_Other_Other_Other_Other_Other	0	0	0	4.63553e-05	2.5368e-09	2.25246e-05	0.162	0.764776	0.0720057	0.618272	0.0351529	0.163537	0.0312482	0.0694404	0	0	0	0	0	2	3	0	0	1
Firmicutes_Clostridia_Clostridiales_Lachnospiraceae_Anaerostipes_Other	8.49847e-05	7.75961e-09	3.93944e-05	0.000339939	2.09957e-07	0.000204918	0.411	0.764776	0.829357	0.890053	0.0415038	0.181419	8.68132e-06	2.71291e-05	2	0	0	4	5	0	1	0	25	18
Firmicutes_Clostridia_Clostridiales_Clostridiaceae_Clostridium_Other	0.00642794	5.3356e-05	0.00326668	0.00181558	2.66513e-06	0.000730086	0.3426	0.764776	0.547619	0.705491	0.0423877	0.181419	1.11865e-74	1.01695e-73	392	353	33	9	45	88	90	4	5	48
Firmicutes_Clostridia_Clostridiales_Lachnospiraceae_Marvinbryantia_Marvinbryantia_formatexigens	0.000903929	1.99332e-06	0.000631399	6.18071e-05	1.38778e-08	5.26835e-05	0.3526	0.764776	0.433848	0.623942	0.0494348	0.199345	4.36617e-22	2.18309e-21	32	0	0	1	84	0	0	0	1	7
Bacteroidetes_Bacteroidia_Bacteroidales_Porphyromonadaceae_Other_Other	0.00363117	3.37043e-05	0.00259632	0.000733959	7.20748e-07	0.00037967	0.3418	0.764776	0.401965	0.618272	0.050302	0.199345	6.70745e-56	5.15958e-55	356	2	1	84	27	0	10	0	46	39
Proteobacteria_Gammaproteobacteria_Pseudomonadales_Pseudomonadaceae_Pseudomonas_Pseudomonas_aeruginosa	0	0	0	3.86294e-05	2.98447e-09	2.44314e-05	0.4454	0.764776	0.179712	0.618272	0.071046	0.260539	0.0624976	0.124995	0	0	0	0	0	2	3	0	0	0
Firmicutes_Bacilli_Lactobacillales_Enterococcaceae_Enterococcus_Other	3.86294e-05	7.46116e-09	3.86294e-05	0	0	0	1	NA	0.423711	0.618272	0.0718332	0.260539	0.0624976	0.124995	0	0	0	0	5	0	0	0	0	0
Proteobacteria_Gammaproteobacteria_Other_Other_Other_Other	0	0	0	3.86294e-05	4.4767e-09	2.99222e-05	0.45	0.764776	0.179712	0.618272	0.0730482	0.260539	0.0624976	0.124995	0	0	0	0	0	1	4	0	0	0
Firmicutes_Other_Other_Other_Other_Other	0.00659018	1.10788e-05	0.00148854	0.00343029	4.8314e-06	0.000982996	0.1276	0.764776	0.222222	0.618272	0.0832413	0.274656	6.81029e-30	4.00605e-29	287	167	47	196	156	178	103	81	50	32
Proteobacteria_Betaproteobacteria_Burkholderiales_Comamonadaceae_Diaphorobacter_Diaphorobacter_nitroreducens	7.72589e-06	2.98447e-10	7.72589e-06	5.40812e-05	4.17825e-09	2.89076e-05	0.284	0.764776	0.193816	0.618272	0.0837653	0.274656	0.0703083	0.132657	0	1	0	0	0	2	4	0	1	0
Proteobacteria_Betaproteobacteria_Burkholderiales_Burkholderiales_incertae_sedis_Aquabacterium_Aquabacterium_hongkongensis	0.000200873	2.9397e-08	7.66772e-05	0.000556264	6.82398e-07	0.000369431	0.5548	0.807214	0.753298	0.854933	0.085553	0.274656	3.6736e-06	1.18503e-05	1	0	7	8	10	11	52	0	4	5
Firmicutes_Clostridia_Clostridiales_Lachnospiraceae_Blautia_Other	5.40812e-05	5.67048e-09	3.36764e-05	7.72589e-06	2.98447e-10	7.72589e-06	0.4462	0.764776	0.440686	0.623942	0.087274	0.274656	0.0703083	0.132657	3	0	0	0	4	0	0	0	0	1
Firmicutes_Clostridia_Other_Other_Other_Other	0.000115888	8.20728e-09	4.05149e-05	4.63553e-05	1.04456e-09	1.44538e-05	0.1892	0.764776	0.336745	0.618272	0.0993562	0.303746	0.0783419	0.145078	5	4	0	1	5	1	2	1	0	2
Firmicutes_Bacilli_Lactobacillales_Lactobacillaceae_Lactobacillus_Lactobacillus_reuteri	0.299695	0.019889	0.0630698	0.134786	0.0302226	0.0777465	0.138	0.764776	0.150794	0.618272	0.104023	0.309178	0	0	12573	2825	8771	8789	5833	3234	689	960	1226	11337
Firmicutes_Clostridia_Clostridiales_Lachnospiraceae_Moryella_Moryella_indoligenes	0.000594893	7.64471e-07	0.000391017	0.000100437	2.8054e-08	7.49052e-05	0.3174	0.764776	0.330547	0.618272	0.121985	0.352766	3.15049e-12	1.2602e-11	52	0	1	1	23	0	3	0	0	10
Proteobacteria_Betaproteobacteria_Burkholderiales_Alcaligenaceae_Achromobacter_Achromobacter_xylosoxidans	0	0	0	3.09035e-05	4.77514e-09	3.09035e-05	1	NA	0.423711	0.618272	0.126301	0.355638	0.124997	0.211859	0	0	0	0	0	4	0	0	0	0
Firmicutes_Clostridia_Clostridiales_Lachnospiraceae_Shuttleworthia_Shuttleworthia_satelles	3.09035e-05	2.5368e-09	2.25246e-05	0	0	0	0.448	0.764776	0.179712	0.618272	0.131377	0.360445	0.124997	0.211859	3	0	0	0	1	0	0	0	0	0
Firmicutes_Bacilli_Lactobacillales_Lactobacillaceae_Lactobacillus_Other	0.0216557	3.35727e-05	0.00259124	0.0172983	1.71945e-05	0.00185443	0.2102	0.764776	0.222222	0.618272	0.157613	0.416488	1.17395e-15	5.10415e-15	534	629	663	667	310	383	324	429	503	600
Firmicutes_Bacilli_Lactobacillales_Lactobacillaceae_Lactobacillus_Lactobacillus_amylolyticus	0.000100437	8.65495e-09	4.16052e-05	1.54518e-05	1.19379e-09	1.54518e-05	0.1194	0.764776	0.0935325	0.618272	0.159589	0.416488	0.00738364	0.0182968	4	1	0	6	2	0	0	0	0	2
Bacteroidetes_Bacteroidia_Bacteroidales_Porphyromonadaceae_Barnesiella_Other	8.49847e-05	1.6713e-08	5.78152e-05	2.31777e-05	1.19379e-09	1.54518e-05	0.5634	0.807214	0.500844	0.679671	0.169762	0.432488	0.0573664	0.122056	2	0	0	1	8	0	0	0	1	2
Proteobacteria_Gammaproteobacteria_Pseudomonadales_Moraxellaceae_Acinetobacter_Acinetobacter_lwoffii	1.54518e-05	1.19379e-09	1.54518e-05	0.000100437	1.46239e-08	5.40812e-05	0.2864	0.764776	0.237504	0.618272	0.194894	0.476411	0.00738364	0.0182968	0	0	0	2	0	6	6	0	0	1
Bacteroidetes_Bacteroidia_Bacteroidales_Other_Other_Other	0.00321397	1.53173e-05	0.00175028	0.00145247	1.67921e-06	0.000579519	0.406	0.764776	0.463344	0.64959	0.195908	0.476411	2.30249e-20	1.09643e-19	248	1	0	73	94	4	67	0	48	69
Proteobacteria_Betaproteobacteria_Burkholderiales_Oxalobacteraceae_Herbaspirillum_Other	0.000386294	6.86427e-08	0.000117169	0.00069533	3.80519e-07	0.000275869	0.3582	0.764776	0.753298	0.854933	0.20822	0.481517	0.000910218	0.00267711	14	0	10	8	18	31	39	3	7	10
Firmicutes_Bacilli_Lactobacillales_Enterococcaceae_Enterococcus_Enterococcus_gallinarum	3.86294e-05	7.46116e-09	3.86294e-05	7.72589e-06	2.98447e-10	7.72589e-06	1	NA	1	NA	0.211994	0.481517	0.218745	0.331431	0	0	0	0	5	0	0	0	0	1
Bacteroidetes_Other_Other_Other_Other_Other	6.9533e-05	2.5368e-09	2.25246e-05	2.31777e-05	1.19379e-09	1.54518e-05	0.2148	0.764776	0.157163	0.618272	0.226427	0.481517	0.145987	0.239323	2	0	1	3	3	0	2	0	1	0
Firmicutes_Bacilli_Lactobacillales_Streptococcaceae_Streptococcus_Other	3.86294e-05	2.98447e-09	2.44314e-05	7.72589e-06	2.98447e-10	7.72589e-06	0.4448	0.764776	0.440686	0.623942	0.226941	0.481517	0.218745	0.331431	3	0	0	2	0	0	0	0	0	1
Firmicutes_Bacilli_Bacillales_Planococcaceae_Other_Other	0	0	0	2.31777e-05	2.68602e-09	2.31777e-05	1	NA	0.423711	0.618272	0.229508	0.481517	0.249997	0.342462	0	0	0	0	0	0	0	0	0	3
Firmicutes_Clostridia_Clostridiales_Clostridiaceae_Clostridium_Clostridium_colinum	0	0	0	2.31777e-05	2.68602e-09	2.31777e-05	1	NA	0.423711	0.618272	0.229508	0.481517	0.249997	0.342462	0	0	0	0	0	0	0	0	0	3
Firmicutes_Clostridia_Clostridiales_Ruminococcaceae_Ruminococcus_Ruminococcus_bromii	2.31777e-05	2.68602e-09	2.31777e-05	0	0	0	1	NA	0.423711	0.618272	0.229508	0.481517	0.249997	0.342462	3	0	0	0	0	0	0	0	0	0
Bacteroidetes_Bacteroidia_Bacteroidales_Porphyromonadaceae_Parabacteroides_Parabacteroides_goldsteinii	2.31777e-05	1.19379e-09	1.54518e-05	0	0	0	0.457	0.764776	0.179712	0.618272	0.248763	0.50222	0.249997	0.342462	1	0	0	0	2	0	0	0	0	0
Deferribacteres_Deferribacteres_Deferribacterales_Deferribacteraceae_Mucispirillum_Mucispirillum_schaedleri	0	0	0	2.31777e-05	1.19379e-09	1.54518e-05	0.4422	0.764776	0.179712	0.618272	0.248763	0.50222	0.249997	0.342462	0	0	0	0	0	1	2	0	0	0
Firmicutes_Bacilli_Bacillales_Staphylococcaceae_Staphylococcus_Staphylococcus_epidermidis	0.000123614	4.77514e-09	3.09035e-05	0.000193147	2.31296e-08	6.80141e-05	0.4668	0.765552	0.594729	0.740236	0.26358	0.52228	0.210987	0.329668	3	5	2	5	1	3	2	2	7	11
Proteobacteria_Alphaproteobacteria_Caulobacterales_Caulobacteraceae_Brevundimonas_Other	2.31777e-05	1.19379e-09	1.54518e-05	6.9533e-05	1.29824e-08	5.09557e-05	0.7238	0.856783	0.651308	0.781538	0.269801	0.524886	0.145987	0.239323	0	0	2	0	1	1	7	0	0	1
Bacteroidetes_Bacteroidia_Bacteroidales_Porphyromonadaceae_Barnesiella_Barnesiella_intestinihominis	0.00030131	1.21169e-07	0.000155672	0.000139066	2.13389e-08	6.53283e-05	0.5048	0.804207	0.588809	0.740236	0.277082	0.529425	0.00750169	0.0182968	22	0	0	9	8	0	9	0	5	4
Firmicutes_Clostridia_Clostridiales_Ruminococcaceae_Other_Other	0.000100437	1.98467e-08	6.30027e-05	3.09035e-05	2.5368e-09	2.25246e-05	0.5204	0.804207	0.325789	0.618272	0.290486	0.545298	0.0490345	0.106597	1	0	1	2	9	0	1	0	0	3
Firmicutes_Bacilli_Lactobacillales_Enterococcaceae_Enterococcus_Enterococcus_faecalis	7.72589e-05	1.11917e-08	4.73112e-05	0.000193147	3.87981e-08	8.80886e-05	0.3266	0.764776	0.328972	0.618272	0.306887	0.562333	0.0166666	0.0378787	5	0	0	0	5	2	10	0	11	2
Proteobacteria_Betaproteobacteria_Burkholderiales_Comamonadaceae_Acidovorax_Acidovorax_temperans	9.27106e-05	6.4166e-09	3.58235e-05	0.000169969	3.32768e-08	8.15804e-05	0.445	0.764776	0.75183	0.854933	0.314379	0.562333	0.121425	0.211859	0	1	4	2	5	10	9	1	2	0
Firmicutes_Bacilli_Lactobacillales_Lactobacillaceae_Lactobacillus_Lactobacillus_vaginalis	0.000123614	2.49203e-08	7.05979e-05	5.40812e-05	4.17825e-09	2.89076e-05	0.5604	0.807214	0.591208	0.740236	0.315327	0.562333	0.0931252	0.166295	10	0	4	1	1	1	0	0	2	4
Actinobacteria_Actinobacteria_Coriobacteriales_Coriobacteriaceae_Enterorhabdus_Enterorhabdus_caecimuris	0.000417198	3.45004e-07	0.00026268	0.000231777	4.10364e-08	9.0594e-05	0.6706	0.856783	1	NA	0.330411	0.579574	0.011621	0.0270257	14	0	0	4	36	2	13	0	6	9
Proteobacteria_Betaproteobacteria_Burkholderiales_Oxalobacteraceae_Massilia_Massilia_niastensis	0.000309035	1.02218e-07	0.000142981	0.000548538	2.59947e-07	0.000228012	0.4218	0.764776	0.521905	0.688129	0.396317	0.655657	0.00418749	0.0110197	4	0	4	11	21	28	28	0	4	11
Firmicutes_Clostridia_Clostridiales_Ruminococcaceae_Ruminococcus_Other	0.00108935	2.14464e-06	0.000654925	0.000455827	4.88259e-07	0.000312493	0.369	0.764776	0.503812	0.679671	0.401298	0.655657	1.00562e-08	3.72451e-08	64	0	0	2	75	0	0	0	41	18
Actinobacteria_Actinobacteria_Actinomycetales_Micrococcaceae_Micrococcus_Other	0	0	0	1.54518e-05	1.19379e-09	1.54518e-05	1	NA	0.423711	0.618272	0.444444	0.655657	0.499998	0.561796	0	0	0	0	0	0	2	0	0	0
Firmicutes_Bacilli_Bacillales_Bacillaceae_Bacillus_Other	0	0	0	1.54518e-05	1.19379e-09	1.54518e-05	1	NA	0.423711	0.618272	0.444444	0.655657	0.499998	0.561796	0	0	0	0	0	0	2	0	0	0
Firmicutes_Bacilli_Lactobacillales_Lactobacillaceae_Lactobacillus_Lactobacillus_oris	0	0	0	1.54518e-05	1.19379e-09	1.54518e-05	1	NA	0.423711	0.618272	0.444444	0.655657	0.499998	0.561796	0	0	0	0	0	0	0	0	0	2
Firmicutes_Clostridia_Clostridiales_Lachnospiraceae_Lactonifactor_Lactonifactor_longoviformis	1.54518e-05	1.19379e-09	1.54518e-05	0	0	0	1	NA	0.423711	0.618272	0.444444	0.655657	0.499998	0.561796	0	0	0	0	2	0	0	0	0	0
Firmicutes_Erysipelotrichia_Erysipelotrichales_Erysipelotrichaceae_Other_Other	1.54518e-05	1.19379e-09	1.54518e-05	0	0	0	1	NA	0.423711	0.618272	0.444444	0.655657	0.499998	0.561796	2	0	0	0	0	0	0	0	0	0
Proteobacteria_Betaproteobacteria_Burkholderiales_Burkholderiaceae_Limnobacter_Limnobacter_thiooxidans	1.54518e-05	1.19379e-09	1.54518e-05	0	0	0	1	NA	0.423711	0.618272	0.444444	0.655657	0.499998	0.561796	0	0	0	0	2	0	0	0	0	0
Proteobacteria_Betaproteobacteria_Neisseriales_Neisseriaceae_Neisseria_Neisseria_pharyngis	0	0	0	1.54518e-05	1.19379e-09	1.54518e-05	1	NA	0.423711	0.618272	0.444444	0.655657	0.499998	0.561796	0	0	0	0	0	0	2	0	0	0
Proteobacteria_Deltaproteobacteria_Bdellovibrionales_Bacteriovoracaceae_Bacteriovorax_Bacteriovorax_stolpii	1.54518e-05	1.19379e-09	1.54518e-05	0	0	0	1	NA	0.423711	0.618272	0.444444	0.655657	0.499998	0.561796	0	0	0	0	2	0	0	0	0	0
Proteobacteria_Gammaproteobacteria_Enterobacteriales_Enterobacteriaceae_Escherichia-Shigella_Other	0	0	0	1.54518e-05	1.19379e-09	1.54518e-05	1	NA	0.423711	0.618272	0.444444	0.655657	0.499998	0.561796	0	0	0	0	0	0	2	0	0	0
Firmicutes_Bacilli_Other_Other_Other_Other	0.00106617	8.80865e-07	0.00041973	0.000849847	1.1714e-07	0.000153062	0.7788	0.8856	1	NA	0.447318	0.655657	0.0862859	0.156883	20	11	31	68	8	32	20	17	11	30
Firmicutes_Bacilli_Lactobacillales_Lactobacillaceae_Lactobacillus_Lactobacillus_intestinalis	0.12047	0.0132612	0.0514999	0.0548615	0.0101903	0.045145	0.414	0.764776	0.150794	0.618272	0.473141	0.660494	0	0	2369	588	2191	8294	2151	736	123	24	150	6068
Proteobacteria_Betaproteobacteria_Burkholderiales_Oxalobacteraceae_Herminiimonas_Other	5.40812e-05	1.01472e-08	4.50493e-05	3.09035e-05	1.04456e-09	1.44538e-05	0.9584	0.9698	0.821222	0.890053	0.493707	0.660494	0.548819	0.603098	0	0	0	1	6	2	1	0	1	0
Bacteroidetes_Bacteroidia_Bacteroidales_Bacteroidaceae_Bacteroides_Bacteroides_acidifaciens	1.54518e-05	4.4767e-10	9.46224e-06	0	0	0	0.4438	0.764776	0.177016	0.618272	0.5	0.660494	0.499998	0.561796	1	0	0	0	1	0	0	0	0	0
Bacteroidetes_Flavobacteria_Flavobacteriales_Flavobacteriaceae_Cloacibacterium_Other	0	0	0	1.54518e-05	4.4767e-10	9.46224e-06	0.4398	0.764776	0.177016	0.618272	0.5	0.660494	0.499998	0.561796	0	0	0	0	0	0	1	0	0	1
Firmicutes_Bacilli_Lactobacillales_Carnobacteriaceae_Atopostipes_Atopostipes_suicloacalis	0	0	0	1.54518e-05	4.4767e-10	9.46224e-06	0.4442	0.764776	0.177016	0.618272	0.5	0.660494	0.499998	0.561796	0	0	0	0	0	1	0	0	0	1
Firmicutes_Clostridia_Clostridiales_Clostridiaceae_Clostridium_Clostridium_irregulare	0	0	0	1.54518e-05	4.4767e-10	9.46224e-06	0.4412	0.764776	0.177016	0.618272	0.5	0.660494	0.499998	0.561796	0	0	0	0	0	1	1	0	0	0
Proteobacteria_Alphaproteobacteria_Rhizobiales_Hyphomicrobiaceae_Devosia_Other	0	0	0	1.54518e-05	4.4767e-10	9.46224e-06	0.443	0.764776	0.177016	0.618272	0.5	0.660494	0.499998	0.561796	0	0	0	0	0	1	1	0	0	0
Proteobacteria_Betaproteobacteria_Burkholderiales_Oxalobacteraceae_Herbaspirillum_Herbaspirillum_chlorophenolicum	1.54518e-05	4.4767e-10	9.46224e-06	0	0	0	0.451	0.764776	0.177016	0.618272	0.5	0.660494	0.499998	0.561796	1	0	0	1	0	0	0	0	0	0
Actinobacteria_Actinobacteria_Coriobacteriales_Coriobacteriaceae_Other_Other	0.000502183	3.36498e-07	0.000259422	0.000347665	8.72956e-08	0.000132133	0.6732	0.856783	0.916563	0.916563	0.524922	0.68496	0.069506	0.132657	16	0	1	11	37	3	13	0	10	19
Proteobacteria_Gammaproteobacteria_Pseudomonadales_Pseudomonadaceae_Pseudomonas_Other	7.72589e-06	2.98447e-10	7.72589e-06	2.31777e-05	1.19379e-09	1.54518e-05	0.7226	0.856783	0.518605	0.688129	0.604788	0.761471	0.624997	0.67204	1	0	0	0	0	0	2	0	0	1
Proteobacteria_Betaproteobacteria_Burkholderiales_Other_Other_Other	0.000108162	7.01349e-09	3.74526e-05	0.000146792	1.74591e-08	5.90917e-05	0.6472	0.856783	0.671373	0.788066	0.606886	0.761471	0.486822	0.561796	5	0	1	4	4	8	7	1	1	2
Firmicutes_Bacilli_Bacillales_Other_Other_Other	7.72589e-06	2.98447e-10	7.72589e-06	2.31777e-05	4.4767e-10	9.46224e-06	0.5296	0.804207	0.270344	0.618272	0.625	0.761471	0.624997	0.67204	0	0	0	1	0	1	1	0	0	1
Firmicutes_Clostridia_Clostridiales_Eubacteriaceae_Anaerofustis_Anaerofustis_stercorihominis	3.09035e-05	2.5368e-09	2.25246e-05	1.54518e-05	4.4767e-10	9.46224e-06	0.8854	0.930805	0.904861	0.916563	0.629229	0.761471	0.687496	0.708759	3	0	0	0	1	0	0	0	1	1
Firmicutes_Bacilli_Lactobacillales_Other_Other_Other	0.000571716	5.99878e-08	0.000109533	0.000641249	1.68622e-08	5.80728e-05	0.623	0.851433	0.344267	0.618272	0.630102	0.761471	0.523175	0.581305	11	11	25	17	10	12	18	21	17	15
Firmicutes_Clostridia_Clostridiales_Clostridiaceae_Clostridium_Clostridium_hiranonis	0.00013134	4.7453e-08	9.74197e-05	7.72589e-05	1.41762e-08	5.3247e-05	0.7192	0.856783	0.906329	0.916563	0.638279	0.761471	0.247764	0.342462	0	13	4	0	0	7	3	0	0	0
Firmicutes_Clostridia_Clostridiales_Clostridiaceae_Other_Other	0.0312203	0.00289217	0.0240506	0.0521266	0.0024741	0.0222446	0.5286	0.804207	0.547619	0.705491	0.641048	0.761471	6.17107e-156	6.85675e-155	102	43	8	3257	631	3146	1972	1376	238	15
Firmicutes_Clostridia_Clostridiales_Ruminococcaceae_Flavonifractor_Flavonifractor_plautii	0.000108162	1.6713e-08	5.78152e-05	5.40812e-05	1.01472e-08	4.50493e-05	0.5786	0.807214	0.503812	0.679671	0.647154	0.761471	0.189229	0.300364	4	0	0	2	8	0	0	0	1	6
Proteobacteria_Betaproteobacteria_Burkholderiales_Oxalobacteraceae_Other_Other	8.49847e-05	2.5368e-09	2.25246e-05	6.18071e-05	1.19379e-09	1.54518e-05	0.5808	0.807214	0.380836	0.618272	0.647606	0.761471	0.647594	0.688929	3	0	2	3	3	1	2	1	1	3
Firmicutes_Clostridia_Clostridiales_Eubacteriaceae_Eubacterium_Eubacterium_hallii	0.000146792	6.29722e-08	0.000112225	0.000231777	2.06674e-07	0.00020331	0.7896	0.8856	0.823664	0.890053	0.691718	0.803827	0.152369	0.245756	15	0	0	0	4	1	0	0	2	27
Proteobacteria_Gammaproteobacteria_Enterobacteriales_Enterobacteriaceae_Escherichia-Shigella_Escherichia_coli	3.09035e-05	1.04456e-09	1.44538e-05	4.63553e-05	4.02903e-09	2.83867e-05	0.8792	0.930805	1	NA	0.698653	0.803827	0.753901	0.768457	0	0	1	1	2	4	0	1	0	1
Firmicutes_Clostridia_Clostridiales_Lachnospiraceae_Other_Other	0.00401746	3.37685e-05	0.00259879	0.00338394	1.19234e-05	0.00154424	0.8286	0.905936	1	NA	0.75834	0.863217	0.00874547	0.0208225	350	3	8	11	148	94	98	0	19	227
Proteobacteria_Betaproteobacteria_Burkholderiales_Oxalobacteraceae_Massilia_Massilia_timonae	0.000146792	6.07339e-08	0.000110212	0.000216325	7.80438e-08	0.000124935	0.9698	0.9698	1	NA	0.787439	0.886905	0.242917	0.342462	1	0	0	3	15	13	14	0	0	1
Proteobacteria_Betaproteobacteria_Burkholderiales_Oxalobacteraceae_Massilia_Other	8.49847e-05	1.22363e-08	4.94698e-05	6.9533e-05	4.02903e-09	2.83867e-05	0.91	0.93275	0.826581	0.890053	0.797786	0.888897	0.823796	0.823796	0	0	2	2	7	3	3	0	0	3
Proteobacteria_Betaproteobacteria_Burkholderiales_Comamonadaceae_Other_Other	1.54518e-05	4.4767e-10	9.46224e-06	2.31777e-05	2.68602e-09	2.31777e-05	1	NA	0.796253	0.883684	0.805823	0.888897	1	NA	0	0	0	1	1	0	3	0	0	0
Firmicutes_Bacilli_Lactobacillales_Lactobacillaceae_Lactobacillus_Lactobacillus_mucosae	3.09035e-05	4.77514e-09	3.09035e-05	2.31777e-05	1.19379e-09	1.54518e-05	1	NA	0.79717	0.883684	0.825372	0.892068	1	NA	0	0	4	0	0	0	1	0	0	2
Proteobacteria_Alphaproteobacteria_Rhizobiales_Bartonellaceae_Bartonella_Other	2.31777e-05	1.19379e-09	1.54518e-05	3.09035e-05	4.77514e-09	3.09035e-05	1	NA	0.79717	0.883684	0.825372	0.892068	1	NA	0	0	2	1	0	0	4	0	0	0
Firmicutes_Clostridia_Clostridiales_Lachnospiraceae_Dorea_Dorea_formicigenerans	3.09035e-05	2.5368e-09	2.25246e-05	1.54518e-05	1.19379e-09	1.54518e-05	0.7138	0.856783	0.607236	0.742177	0.85241	0.912079	0.687496	0.708759	3	0	0	0	1	0	0	0	2	0
Firmicutes_Bacilli_Lactobacillales_Lactobacillaceae_Lactobacillus_Lactobacillus_apodemi	3.09035e-05	2.5368e-09	2.25246e-05	2.31777e-05	4.4767e-10	9.46224e-06	1	NA	0.908073	0.916563	0.889047	0.933801	1	NA	3	0	0	0	1	1	0	1	1	0
Firmicutes_Clostridia_Clostridiales_Clostridiaceae_Clostridium_Clostridium_bifermentans	0.0196006	0.00112068	0.0149711	0.0228145	0.0015487	0.0175994	0.7652	0.883752	0.655836	0.781538	0.89385	0.933801	1.50225e-08	5.36519e-08	0	2001	536	0	0	2353	599	1	0	0
Proteobacteria_Betaproteobacteria_Burkholderiales_Sutterellaceae_Parasutterella_Parasutterella_excrementihominis	0.000177695	2.43234e-08	6.97472e-05	0.000154518	2.46218e-08	7.01738e-05	0.869	0.930805	0.834035	0.890053	0.900847	0.933801	0.760772	0.768457	3	1	2	11	6	7	4	0	0	9
Proteobacteria_Alphaproteobacteria_Sphingomonadales_Sphingomonadaceae_Other_Other	3.09035e-05	1.04456e-09	1.44538e-05	1.54518e-05	1.19379e-09	1.54518e-05	0.6782	0.856783	0.406483	0.618272	0.90762	0.933801	0.687496	0.708759	0	0	2	1	1	0	2	0	0	0
Bacteroidetes_Sphingobacteria_Sphingobacteriales_Chitinophagaceae_Other_Other	1.54518e-05	4.4767e-10	9.46224e-06	2.31777e-05	1.19379e-09	1.54518e-05	1	NA	0.904861	0.916563	0.953337	0.969444	1	NA	1	0	0	0	1	0	2	0	0	1
Firmicutes_Clostridia_Clostridiales_Lachnospiraceae_Roseburia_Other	2.31777e-05	2.68602e-09	2.31777e-05	1.54518e-05	1.19379e-09	1.54518e-05	1	NA	1	NA	0.960384	0.969444	1	NA	3	0	0	0	0	0	0	0	0	2
Firmicutes_Bacilli_Lactobacillales_Lactobacillaceae_Other_Other	3.86294e-05	2.98447e-09	2.44314e-05	3.09035e-05	1.79068e-09	1.89245e-05	1	NA	0.904861	0.916563	0.969988	0.969988	1	NA	3	2	0	0	0	0	0	0	2	2
Unclassified_Other_Other_Other_Other_Other_Other	7.72589e-06	2.98447e-10	7.72589e-06	7.72589e-06	2.98447e-10	7.72589e-06	1	NA	1	NA	1	NA	1	NA	0	1	0	0	0	1	0	0	0	0
Actinobacteria_Actinobacteria_Other_Other_Other_Other	7.72589e-06	2.98447e-10	7.72589e-06	0	0	0	1	NA	0.423711	0.618272	1	NA	1	NA	0	1	0	0	0	0	0	0	0	0
Actinobacteria_Actinobacteria_Actinomycetales_Other_Other_Other	7.72589e-06	2.98447e-10	7.72589e-06	0	0	0	1	NA	0.423711	0.618272	1	NA	1	NA	0	0	0	1	0	0	0	0	0	0
Actinobacteria_Actinobacteria_Actinomycetales_Microbacteriaceae_Agrococcus_Agrococcus_jenensis	0	0	0	7.72589e-06	2.98447e-10	7.72589e-06	1	NA	0.423711	0.618272	1	NA	1	NA	0	0	0	0	0	0	1	0	0	0
Actinobacteria_Actinobacteria_Actinomycetales_Micrococcaceae_Rothia_Rothia_mucilaginosa	0	0	0	7.72589e-06	2.98447e-10	7.72589e-06	1	NA	0.423711	0.618272	1	NA	1	NA	0	0	0	0	0	0	1	0	0	0
Actinobacteria_Actinobacteria_Actinomycetales_Propionibacteriaceae_Propionibacterium_Propionibacterium_acnes	0	0	0	7.72589e-06	2.98447e-10	7.72589e-06	1	NA	0.423711	0.618272	1	NA	1	NA	0	0	0	0	0	0	0	0	0	1
Actinobacteria_Actinobacteria_Bifidobacteriales_Bifidobacteriaceae_Bifidobacterium_Bifidobacterium_pseudolongum	7.72589e-06	2.98447e-10	7.72589e-06	0	0	0	1	NA	0.423711	0.618272	1	NA	1	NA	0	1	0	0	0	0	0	0	0	0
Bacteroidetes_Bacteroidia_Bacteroidales_Bacteroidaceae_Bacteroides_Other	0	0	0	7.72589e-06	2.98447e-10	7.72589e-06	1	NA	0.423711	0.618272	1	NA	1	NA	0	0	0	0	0	0	0	0	1	0
Bacteroidetes_Bacteroidia_Bacteroidales_Bacteroidaceae_Bacteroides_Bacteroides_pectinophilus	7.72589e-06	2.98447e-10	7.72589e-06	0	0	0	1	NA	0.423711	0.618272	1	NA	1	NA	0	1	0	0	0	0	0	0	0	0
Bacteroidetes_Bacteroidia_Bacteroidales_Prevotellaceae_Prevotella_Other	7.72589e-06	2.98447e-10	7.72589e-06	0	0	0	1	NA	0.423711	0.618272	1	NA	1	NA	1	0	0	0	0	0	0	0	0	0
Bacteroidetes_Flavobacteria_Flavobacteriales_Flavobacteriaceae_Other_Other	7.72589e-06	2.98447e-10	7.72589e-06	0	0	0	1	NA	0.423711	0.618272	1	NA	1	NA	0	0	1	0	0	0	0	0	0	0
Bacteroidetes_Flavobacteria_Flavobacteriales_Flavobacteriaceae_Chryseobacterium_Haloanella_gallinarum	0	0	0	7.72589e-06	2.98447e-10	7.72589e-06	1	NA	0.423711	0.618272	1	NA	1	NA	0	0	0	0	0	0	0	0	0	1
Bacteroidetes_Flavobacteria_Flavobacteriales_Flavobacteriaceae_Flavobacterium_Flavobacterium_sasangense	3.09035e-05	1.04456e-09	1.44538e-05	2.31777e-05	2.68602e-09	2.31777e-05	1	NA	0.47848	0.664298	1	NA	1	NA	0	0	1	2	1	0	3	0	0	0
Firmicutes_Bacilli_Bacillales_Bacillaceae_Other_Other	7.72589e-06	2.98447e-10	7.72589e-06	0	0	0	1	NA	0.423711	0.618272	1	NA	1	NA	0	1	0	0	0	0	0	0	0	0
Firmicutes_Bacilli_Bacillales_Bacillaceae_Bacillus_Bacillus_vireti	0	0	0	7.72589e-06	2.98447e-10	7.72589e-06	1	NA	0.423711	0.618272	1	NA	1	NA	0	0	0	0	0	0	1	0	0	0
Firmicutes_Bacilli_Bacillales_Planococcaceae_Psychrobacillus_Psychrobacillus_psychrotolerans	7.72589e-06	2.98447e-10	7.72589e-06	7.72589e-06	2.98447e-10	7.72589e-06	1	NA	1	NA	1	NA	1	NA	0	0	0	0	1	0	1	0	0	0
Firmicutes_Bacilli_Lactobacillales_Lactobacillaceae_Lactobacillus_Lactobacillus_coleohominis	7.72589e-06	2.98447e-10	7.72589e-06	0	0	0	1	NA	0.423711	0.618272	1	NA	1	NA	0	0	1	0	0	0	0	0	0	0
Firmicutes_Bacilli_Lactobacillales_Lactobacillaceae_Lactobacillus_Lactobacillus_gastricus	7.72589e-06	2.98447e-10	7.72589e-06	1.54518e-05	4.4767e-10	9.46224e-06	1	NA	0.600471	0.740236	1	NA	1	NA	0	0	1	0	0	1	0	0	0	1
Firmicutes_Bacilli_Lactobacillales_Lactobacillaceae_Lactobacillus_Lactobacillus_helveticus	7.72589e-06	2.98447e-10	7.72589e-06	0	0	0	1	NA	0.423711	0.618272	1	NA	1	NA	0	0	0	1	0	0	0	0	0	0
Firmicutes_Bacilli_Lactobacillales_Lactobacillaceae_Lactobacillus_Lactobacillus_kefiranofaciens	7.72589e-06	2.98447e-10	7.72589e-06	0	0	0	1	NA	0.423711	0.618272	1	NA	1	NA	0	0	0	1	0	0	0	0	0	0
Firmicutes_Bacilli_Lactobacillales_Lactobacillaceae_Lactobacillus_Lactobacillus_pontis	7.72589e-06	2.98447e-10	7.72589e-06	7.72589e-06	2.98447e-10	7.72589e-06	1	NA	1	NA	1	NA	1	NA	0	0	0	0	1	0	0	0	1	0
Firmicutes_Bacilli_Lactobacillales_Lactobacillaceae_Lactobacillus_Lactobacillus_taiwanensis	7.72589e-06	2.98447e-10	7.72589e-06	0	0	0	1	NA	0.423711	0.618272	1	NA	1	NA	0	1	0	0	0	0	0	0	0	0
Firmicutes_Clostridia_Clostridiales_Clostridiaceae_Clostridium_Clostridium_cadaveris	7.72589e-06	2.98447e-10	7.72589e-06	0	0	0	1	NA	0.423711	0.618272	1	NA	1	NA	0	1	0	0	0	0	0	0	0	0
Firmicutes_Clostridia_Clostridiales_Clostridiaceae_Clostridium_Clostridium_difficile	7.72589e-06	2.98447e-10	7.72589e-06	0	0	0	1	NA	0.423711	0.618272	1	NA	1	NA	0	1	0	0	0	0	0	0	0	0
Firmicutes_Clostridia_Clostridiales_Clostridiaceae_Clostridium_Clostridium_innocuum	7.72589e-06	2.98447e-10	7.72589e-06	0	0	0	1	NA	0.423711	0.618272	1	NA	1	NA	1	0	0	0	0	0	0	0	0	0
Firmicutes_Clostridia_Clostridiales_Clostridiaceae_Clostridium_Clostridium_methylpentosum	7.72589e-06	2.98447e-10	7.72589e-06	0	0	0	1	NA	0.423711	0.618272	1	NA	1	NA	0	0	0	0	1	0	0	0	0	0
Firmicutes_Clostridia_Clostridiales_Eubacteriaceae_Eubacterium_Eubacterium_biforme	7.72589e-06	2.98447e-10	7.72589e-06	0	0	0	1	NA	0.423711	0.618272	1	NA	1	NA	0	0	0	0	1	0	0	0	0	0
Firmicutes_Clostridia_Clostridiales_Lachnospiraceae_Butyrivibrio_Butyrivibrio_proteoclasticus	7.72589e-06	2.98447e-10	7.72589e-06	0	0	0	1	NA	0.423711	0.618272	1	NA	1	NA	1	0	0	0	0	0	0	0	0	0
Firmicutes_Clostridia_Clostridiales_Lachnospiraceae_Dorea_Dorea_longicatena	7.72589e-06	2.98447e-10	7.72589e-06	0	0	0	1	NA	0.423711	0.618272	1	NA	1	NA	0	0	0	0	1	0	0	0	0	0
Firmicutes_Clostridia_Clostridiales_Ruminococcaceae_Anaerotruncus_Anaerotruncus_colihominis	7.72589e-06	2.98447e-10	7.72589e-06	7.72589e-06	2.98447e-10	7.72589e-06	1	NA	1	NA	1	NA	1	NA	0	0	0	0	1	0	0	0	0	1
Firmicutes_Clostridia_Clostridiales_Ruminococcaceae_Faecalibacterium_Faecalibacterium_prausnitzii	7.72589e-06	2.98447e-10	7.72589e-06	0	0	0	1	NA	0.423711	0.618272	1	NA	1	NA	0	0	0	0	1	0	0	0	0	0
Proteobacteria_Alphaproteobacteria_Caulobacterales_Caulobacteraceae_Other_Other	7.72589e-06	2.98447e-10	7.72589e-06	0	0	0	1	NA	0.423711	0.618272	1	NA	1	NA	0	0	1	0	0	0	0	0	0	0
Proteobacteria_Alphaproteobacteria_Caulobacterales_Caulobacteraceae_Brevundimonas_Brevundimonas_subvibrioides	7.72589e-06	2.98447e-10	7.72589e-06	0	0	0	1	NA	0.423711	0.618272	1	NA	1	NA	0	1	0	0	0	0	0	0	0	0
Proteobacteria_Alphaproteobacteria_Caulobacterales_Caulobacteraceae_Brevundimonas_Brevundimonas_vesicularis	0	0	0	7.72589e-06	2.98447e-10	7.72589e-06	1	NA	0.423711	0.618272	1	NA	1	NA	0	0	0	0	0	0	1	0	0	0
Proteobacteria_Alphaproteobacteria_Caulobacterales_Caulobacteraceae_Phenylobacterium_Phenylobacterium_falsum	0	0	0	7.72589e-06	2.98447e-10	7.72589e-06	1	NA	0.423711	0.618272	1	NA	1	NA	0	0	0	0	0	0	1	0	0	0
Proteobacteria_Alphaproteobacteria_Rhizobiales_Hyphomicrobiaceae_Other_Other	0	0	0	7.72589e-06	2.98447e-10	7.72589e-06	1	NA	0.423711	0.618272	1	NA	1	NA	0	0	0	0	0	0	1	0	0	0
Proteobacteria_Alphaproteobacteria_Rhodobacterales_Rhodobacteraceae_Labrenzia_Labrenzia_aggregata	0	0	0	7.72589e-06	2.98447e-10	7.72589e-06	1	NA	0.423711	0.618272	1	NA	1	NA	0	0	0	0	0	0	1	0	0	0
Proteobacteria_Alphaproteobacteria_Sphingomonadales_Sphingomonadaceae_Sphingobium_Sphingobium_amiense	7.72589e-06	2.98447e-10	7.72589e-06	7.72589e-06	2.98447e-10	7.72589e-06	1	NA	1	NA	1	NA	1	NA	1	0	0	0	0	0	0	0	0	1
Proteobacteria_Betaproteobacteria_Other_Other_Other_Other	0	0	0	7.72589e-06	2.98447e-10	7.72589e-06	1	NA	0.423711	0.618272	1	NA	1	NA	0	0	0	0	0	0	1	0	0	0
Proteobacteria_Betaproteobacteria_Burkholderiales_Burkholderiaceae_Ralstonia_Ralstonia_insidiosa	0	0	0	7.72589e-06	2.98447e-10	7.72589e-06	1	NA	0.423711	0.618272	1	NA	1	NA	0	0	0	0	0	1	0	0	0	0
Proteobacteria_Betaproteobacteria_Burkholderiales_Burkholderiales_incertae_sedis_Leptothrix_Leptothrix_ginsengisoli	7.72589e-06	2.98447e-10	7.72589e-06	0	0	0	1	NA	0.423711	0.618272	1	NA	1	NA	0	0	0	0	1	0	0	0	0	0
Proteobacteria_Betaproteobacteria_Burkholderiales_Comamonadaceae_Comamonas_Comamonas_aquatica	7.72589e-06	2.98447e-10	7.72589e-06	0	0	0	1	NA	0.423711	0.618272	1	NA	1	NA	0	0	0	0	1	0	0	0	0	0
Proteobacteria_Betaproteobacteria_Burkholderiales_Comamonadaceae_Hydrogenophaga_Other	7.72589e-06	2.98447e-10	7.72589e-06	1.54518e-05	4.4767e-10	9.46224e-06	1	NA	0.600471	0.740236	1	NA	1	NA	0	0	0	0	1	1	0	0	1	0
Proteobacteria_Betaproteobacteria_Burkholderiales_Comamonadaceae_Limnohabitans_Limnohabitans_parvus	0	0	0	7.72589e-06	2.98447e-10	7.72589e-06	1	NA	0.423711	0.618272	1	NA	1	NA	0	0	0	0	0	0	1	0	0	0
Proteobacteria_Betaproteobacteria_Burkholderiales_Oxalobacteraceae_Herbaspirillum_Pseudoburkholderia_malthae	9.27106e-05	1.16394e-08	4.82481e-05	0.000100437	1.16394e-08	4.82481e-05	1	NA	1	NA	1	NA	1	NA	1	0	1	3	7	6	5	0	0	2
Proteobacteria_Betaproteobacteria_Neisseriales_Neisseriaceae_Vogesella_Vogesella_perlucida	0	0	0	7.72589e-06	2.98447e-10	7.72589e-06	1	NA	0.423711	0.618272	1	NA	1	NA	0	0	0	0	0	0	0	0	0	1
Proteobacteria_Deltaproteobacteria_Other_Other_Other_Other	0	0	0	7.72589e-06	2.98447e-10	7.72589e-06	1	NA	0.423711	0.618272	1	NA	1	NA	0	0	0	0	0	0	0	0	0	1
Proteobacteria_Deltaproteobacteria_Bdellovibrionales_Other_Other_Other	0	0	0	7.72589e-06	2.98447e-10	7.72589e-06	1	NA	0.423711	0.618272	1	NA	1	NA	0	0	0	0	0	1	0	0	0	0
Proteobacteria_Deltaproteobacteria_Bdellovibrionales_Bacteriovoracaceae_Peredibacter_Peredibacter_starrii	0	0	0	7.72589e-06	2.98447e-10	7.72589e-06	1	NA	0.423711	0.618272	1	NA	1	NA	0	0	0	0	0	0	1	0	0	0
Proteobacteria_Gammaproteobacteria_Aeromonadales_Aeromonadaceae_Aeromonas_Aeromonas_veronii	0	0	0	7.72589e-06	2.98447e-10	7.72589e-06	1	NA	0.423711	0.618272	1	NA	1	NA	0	0	0	0	0	0	0	1	0	0
Proteobacteria_Gammaproteobacteria_Alteromonadales_Shewanellaceae_Shewanella_Shewanella_decolorationis	7.72589e-06	2.98447e-10	7.72589e-06	0	0	0	1	NA	0.423711	0.618272	1	NA	1	NA	1	0	0	0	0	0	0	0	0	0
Proteobacteria_Gammaproteobacteria_Enterobacteriales_Enterobacteriaceae_Proteus_Proteus_mirabilis	7.72589e-06	2.98447e-10	7.72589e-06	0	0	0	1	NA	0.423711	0.618272	1	NA	1	NA	0	0	0	1	0	0	0	0	0	0
Proteobacteria_Gammaproteobacteria_Vibrionales_Vibrionaceae_Vibrio_Vibrio_cholerae	0	0	0	7.72589e-06	2.98447e-10	7.72589e-06	1	NA	0.423711	0.618272	1	NA	1	NA	0	0	0	0	0	0	1	0	0	0
Proteobacteria_Gammaproteobacteria_Xanthomonadales_Xanthomonadaceae_Pseudoxanthomonas_Pseudoxanthomonas_mexicana	0	0	0	7.72589e-06	2.98447e-10	7.72589e-06	1	NA	0.423711	0.618272	1	NA	1	NA	0	0	0	0	0	1	0	0	0	0

## Sheet: S5_Table
S5 Table: Highly variable species in the acutely infected group
	Acute Infected					Acute uninfected					Averages		Std Deviations		Metrics
Species	infected (n=5)					uninfected (n=5)					AVG AI	AVG AU	STDAI	STDAU	Ratio	Log-ratio	FTEST	FDR-corrected
	1	2	3	4	5	1	2	3	4	5
Bacillaceae_Other	0	0	0	0.0327011	0.0817528	28.499	8.22433	1.56965	15.5494	2.64879	0.0228908	11.2982	0.0358223	11.1001	0.00322721	-2.49117	6.50802e-10	3.70957e-08
Sporosarcina_pasteurii	0	0	0	0	0.0163506	2.64879	0.997384	0.196207	1.40615	0.261609	0.00327011	1.10203	0.00731219	1.00284	0.0072915	-2.13718	1.69574e-08	4.83286e-07
Ralstonia_insidiosa	0	0	0.0817528	0.0654022	0.0163506	0	0	4.92152	0	3.72793	0.0327011	1.72989	0.0383455	2.40604	0.0159371	-1.79759	3.8681e-07	7.18776e-06
Bacillales_Other	0	0	0.0163506	0.0490517	0.0327011	1.97842	0.915631	0.0490517	1.24264	0.196207	0.0196207	0.87639	0.0213185	0.79014	0.0269807	-1.56895	3.17337e-06	2.58403e-05
Mucispirillum_schaedleri	0	0	0	0.0163506	0.130804	0	0	0	0	1.34075	0.029431	0.268149	0.05711	0.5996	0.0952469	-1.02115	0.000482059	0.00211364
Lachnospiraceae_Other	0.0490517	0.0817528	0	0.0327011	0.0981033	0.0654022	0.474166	0.0817528	0.0163506	0.58862	0.0523218	0.245258	0.0390364	0.265413	0.147078	-0.832453	0.00265202	0.00944782
Lactobacillus_gasseri	0.163506	0	0	0.359712	0	0	0	0.0327011	0	0.0490517	0.104644	0.0163506	0.159198	0.0231232	6.88477	0.837889	0.00252602	0.00944782
Proteus_mirabilis	0.0163506	0	0.0163506	1.29169	0	0.0817528	0.130804	0.147155	0.0327011	0.0490517	0.264879	0.088293	0.574065	0.0498625	11.513	1.06119	0.000334735	0.00158999
Eubacterium_dolichum	0	0.637672	0.0163506	0	0	0	0.0490517	0	0	0.0163506	0.130804	0.0130804	0.283436	0.0213185	13.2953	1.1237	0.00018916	0.000980193
Bacteroides_acidifaciens	0	0	0.474166	0.0490517	0	0.0163506	0	0	0	0.0327011	0.104644	0.00981033	0.207658	0.0146244	14.1995	1.15227	0.000145658	0.000830251
Bacteroidetes_Other	0.0163506	0.277959	0.0817528	0	0	0	0	0.0163506	0	0	0.0752126	0.00327011	0.118245	0.00731219	16.171	1.20874	8.68537e-05	0.000550073
Barnesiella_intestinihominis	0.0163506	0.866579	0.376063	0.0327011	0.0490517	0.0163506	0.0163506	0.0327011	0	0	0.268149	0.0130804	0.366267	0.0136799	26.7742	1.42772	1.16325e-05	8.28816e-05
Porphyromonadaceae_Other	0.29431	5.72269	1.16089	0.0817528	0.555919	0.0327011	0.0490517	0.163506	0.0163506	0.0327011	1.56311	0.058862	2.36022	0.0596291	39.5817	1.59749	2.44024e-06	2.31823e-05
Lactobacillus_taiwanensis	0.0327011	0	0	0.850229	0	0	0	0.0163506	0	0	0.176586	0.00327011	0.376844	0.00731219	51.5364	1.71211	8.49687e-07	9.68643e-06
Bacteroidales_Other	0.899281	15.4022	7.07979	0.29431	0.228908	0.0327011	0.0490517	0.277959	0.0163506	0.0163506	4.7809	0.0784827	6.59573	0.112332	58.7164	1.76876	5.04404e-07	7.18776e-06

## Sheet: S6_Table
S6: Emerging of highly variable species in chornically infected mice of the first cohort
											infected (n=5)					uninfected (n=5)
Species	Name	AVG CI	STDCI	AVG CU	STDCU	Ratio	Log-Ratio	FTEST	FDR-corrected	Name	1	2	3	4	5	1	2	3	4	5	MAX
Bacteroidetes_Bacteroidia_Bacteroidales_Porphyromonadaceae_Other_Other	Porphyromonadaceae_unassigned	0.363117	0.580554	0.0733959	0.0848969	6.83834	0.834951	0.00259337	0.0135424	Lactobacillus_johnsonii	0.0115888	0.0154518	0.0270406	39.0621	0.0618071	0.0193147	0.0154518	0	0.0154518	0.0193147	39.0621
Firmicutes_Clostridia_Clostridiales_Other_Other_Other	Clostridiales_unassigned	1.67497	2.06025	0.376251	0.246391	8.3617	0.922294	0.00118178	0.00699977	Ruminococcus_gnavus	0.490594	35.0137	9.611	0.0115888	0.0347665	0.258817	0.625797	0.0270406	2.10144	1.85035	35.0137
Firmicutes_Clostridia_Clostridiales_Ruminococcaceae_Oscillibacter_Oscillibacter_valericigenes	Oscillibacter_valericigenes	0.0154518	0.0304168	0.00309035	0.00323197	9.41124	0.973647	0.00074228	0.00476296	Clostridium_disporicum	0.00772589	0.00386294	0.00386294	28.0643	0.838259	0.845984	1.15116	0	0	0.00386294	28.0643
Firmicutes_Clostridia_Clostridiales_Ruminococcaceae_Pseudoflavonifractor_Pseudoflavonifractor_capillosus	Pseudoflavonifractor_capillosus	0.0324487	0.0483717	0.00386294	0.00473112	10.2242	1.00963	0.000535328	0.0037473	Turicibacter_sanguinis	5.96438	0.108162	0.00386294	0	0.0309035	0.52536	0.247228	0.602619	0.0927106	0.324487	5.96438
Firmicutes_Clostridia_Clostridiales_Lachnospiraceae_Marvinbryantia_Marvinbryantia_formatexigens	Marvinbryantia_formatexigens	0.0903929	0.141185	0.00618071	0.0117804	11.9848	1.07863	0.000285497	0.00219833	Clostridiales_unassigned	0.309035	3.63889	4.19902	0.189284	0.0386294	0.243365	0.355391	0.173832	0.309035	0.799629	4.19902
Firmicutes_Erysipelotrichia_Erysipelotrichales_Erysipelotrichaceae_Turicibacter_Turicibacter_sanguinis	Turicibacter_sanguinis	1.22146	2.65173	0.358481	0.207134	12.802	1.10728	0.000219786	0.00188039	Robinsoniella_peoriensis	0.0347665	3.51528	0.401746	0	0	0.0115888	0.00772589	0	0.0309035	0.0463553	3.51528
Firmicutes_Clostridia_Clostridiales_Ruminococcaceae_Ruminococcus_Ruminococcus_gnavus	Ruminococcus_gnavus	9.03233	15.0886	0.972689	0.944533	15.9746	1.20343	9.118e-05	0.000877608	Porphyromonadaceae_unassigned	0.324487	0.104299	1.37521	0.00772589	0.00386294	0	0.0386294	0	0.177695	0.150655	1.37521
Firmicutes_Clostridia_Clostridiales_Clostridiaceae_Clostridium_Clostridium_disporicum	Clostridium_disporicum	5.7836	12.4605	0.400201	0.556791	22.3792	1.34984	2.3794e-05	0.000273062	Akkermansia_muciniphila	0.00772589	0	0.718507	0	0.00386294	0	0.00772589	0	0.0154518	0.0347665	0.718507
Verrucomicrobia_Verrucomicrobiae_Verrucomicrobiales_Verrucomicrobiaceae_Akkermansia_Akkermansia_muciniphila	Akkermansia_muciniphila	0.146019	0.320047	0.0115888	0.0144538	22.1427	1.34523	2.48238e-05	0.000273062	Eubacterium_unassigned	0	0.26268	0.351528	0	0	0.00386294	0	0	0.00386294	0.00386294	0.351528
Firmicutes_Clostridia_Clostridiales_Clostridiaceae_Clostridium_Clostridium_cocleatum	Clostridium_cocleatum	0.0417198	0.0889903	0.00231777	0.00345512	25.7561	1.41088	1.35797e-05	0.000209127	Marvinbryantia_formatexigens	0.00386294	0.324487	0.123614	0	0	0	0	0	0.00386294	0.0270406	0.324487
Firmicutes_Clostridia_Clostridiales_Eubacteriaceae_Eubacterium_Eubacterium_dolichum	Eubacterium_dolichum	0.0726233	0.130611	0.00309035	0.00323197	40.4122	1.60651	2.24592e-06	4.3234e-05	Eubacterium_dolichum	0	0.0618071	0.30131	0	0	0.00772589	0.00386294	0	0.00386294	0	0.30131
Firmicutes_Clostridia_Clostridiales_Lachnospiraceae_Robinsoniella_Robinsoniella_peoriensis	Robinsoniella_peoriensis	0.790358	1.53268	0.0193147	0.0189245	80.9894	1.90843	1.394e-07	3.59831e-06	Clostridium_cocleatum	0.00386294	0.00386294	0.200873	0	0	0	0.00772589	0	0.00386294	0	0.200873
Firmicutes_Clostridia_Clostridiales_Eubacteriaceae_Eubacterium_Other	Eubacterium_unassigned	0.122842	0.171116	0.00231777	0.00211582	80.8744	1.90781	1.40194e-07	3.59831e-06	Pseudoflavonifractor_capillosus	0	0.108162	0.0540812	0	0	0.00386294	0	0	0.0115888	0.00386294	0.108162
Firmicutes_Bacilli_Lactobacillales_Lactobacillaceae_Lactobacillus_Lactobacillus_johnsonii	Lactobacillus_johnsonii	7.83559	17.4561	0.0139066	0.00801037	2179.19	3.3383	2.66053e-13	2.04861e-11	Oscillibacter_valericigenes	0	0.069533	0.00772589	0	0	0.00386294	0	0	0.00772589	0.00386294	0.069533
Proteobacteria_Betaproteobacteria_Burkholderiales_Burkholderiaceae_Cupriavidus_Cupriavidus_gilardii	Cupriavidus_gilardii	0.00386294	0.00386294	0.0162244	0.0220898	0.174874	-0.757274	0.00517862	0.0249221	Cupriavidus_gilardii	0	0.00772589	0.00772589	0.00386294	0	0.0270406	0.0502183	0	0	0.00386294
Firmicutes_Clostridia_Clostridiales_Lachnospiraceae_Moryella_Moryella_indoligenes	Moryella_indoligenes	0.0594893	0.087434	0.0100437	0.0167493	5.22015	0.717683	0.00734079	0.0318289	Moryella_indoligenes	0.00386294	0.0888477	0.200873	0	0.00386294	0	0.0115888	0	0	0.0386294
Firmicutes_Clostridia_Clostridiales_Lachnospiraceae_Anaerostipes_Other	Anaerostipes_Other	0.00849847	0.00880886	0.0339939	0.0458211	0.192245	-0.716145	0.00744053	0.0318289	Anaerostipes_Other	0.0154518	0.0193147	0.00772589	0	0	0	0.00386294	0	0.0965736	0.069533
Firmicutes_Bacilli_Lactobacillales_Enterococcaceae_Enterococcus_Enterococcus_gallinarum	Enterococcus_gallinarum	0.00386294	0.0086378	0.000772589	0.00172756	5	0.69897	0.00864816	0.0350478	Enterococcus_gallinarum	0	0.0193147	0	0	0	0	0	0	0	0.00386294
Proteobacteria_Betaproteobacteria_Burkholderiales_Burkholderiales_incertae_sedis_Aquabacterium_Aquabacterium_hongkongensis	Aquabacterium_hongkongensis	0.0200873	0.0171455	0.0556264	0.0826074	0.207555	-0.682867	0.00995226	0.0383162	Aquabacterium_hongkongensis	0.0309035	0.0386294	0.00386294	0	0.0270406	0.0424924	0.200873	0	0.0154518	0.0193147
Firmicutes_Clostridia_Clostridiales_Clostridiaceae_Clostridium_Other	Clostridium_unassigned	0.642794	0.730452	0.181558	0.163252	4.47438	0.650733	0.0131488	0.0482123	Clostridium_unassigned	0.0347665	0.173832	1.51427	1.36362	0.127477	0.339939	0.347665	0.0154518	0.0193147	0.185421
Firmicutes_Clostridia_Clostridiales_Lachnospiraceae_Blautia_Other	Blautia_unassigned	0.00540812	0.00753026	0.000772589	0.00172756	4.3589	0.639377	0.0145	0.05075	Blautia_unassigned	0	0.0154518	0.0115888	0	0	0	0	0	0	0.00386294

## Sheet: S7_Table
S7 Table: Results of quality control filtering in the second chronic cohort
Table summary
Metric	Sample
Number of samples	62
Number of features	341
Total frequency	458793
Frequency per sample
	Frequency
Minimum frequency	2016
1st quartile	5313.5
Median frequency	7078
3rd quartile	8375
Maximum frequency	18369
Mean frequency	7399.89
Frequency per feature
	Frequency
Minimum frequency	10
1st quartile	26
Median frequency	67
3rd quartile	333
Maximum frequency	106298
Mean frequency	1345.43

## Sheet: S8_Table
S8 Table: Confirming the presence of T. gondii in the second chronic cohort
Sample ID	Group designation	IgG	MAG1
T2	CON	0.215	NA
T3	CON	0.21	NA
T4	CON	0.39	NA
T5	CON	0.166	NA
T6	CON	0.235	NA
T7	CON	0.174	NA
T8	CON	0.18	NA
T9	CON	0.242	NA
T10	CON	0.311	NA
T11	CON	0.191	NA
T12	CON	0.305	NA
T13	CON	0.308	NA
T14	CON	0.235	NA
T15	CON	0.151	NA
T16	CON	0.198	NA
T17	CON	0.16	NA
T20	CON	0.374	NA
T21	INF	3.847	0.101
T22	INF	3.782	0.163
T23	INF	3.805	0.164
T24	INF	3.737	0.047
T25	INF	3.834	3.287
T26	INF	3.886	0.043
T27	INF	3.819	0.048
T28	INF	3.884	3.494
T29	INF	3.771	0.468
T30	INF	3.696	3.211
T31	INF	3.786	0.044
T32	INF	3.788	0.043
T33	INF	0.144	0.044
T34	INF	3.821	0.578
T35	INF	3.788	0.046
T36	INF	0.156	0.044
T38	INF	3.778	0.143
T39	INF	3.71	0.041
T40	INF	3.757	0.13
T41	INF	3.713	2.175
T42	INF	3.795	0.075
T44	INF	0.18	0.042
T45	INF	3.91	0.679
T46	INF	0.169	0.043
T47	INF	3.888	0.263
T48	INF	3.86	2.764
T49	INF	3.754	0.041
T50	INF	3.832	0.074
T51	INF	0.166	0.042
T52	INF	0.17	0.042
T53	INF	3.869	0.154
T54	INF	3.853	3.193
T55	INF	0.236	0.042
T56	INF	0.892	0.049
T57	INF	3.746
T58	INF	3.851
T59	INF	0.128	0.043
T60	INF	0.126	0.045
T62	INF	0.126	0.049
T63	INF	0.225	0.042
T64	INF	3.743	0.043
T65	INF	0.353	0.043
T66	INF	0.079	0.042
T67	INF	3.912
T68	INF	3.802	0.041
BLneg4	BLANK
BLneg3	BLANK
BLneg2	BLANK
BLneg1	BLANK
BL3Pl3	BLANK
BL2Pl3	BLANK
BL1Pl3	BLANK
BL20	BLANK
BC2	BLANK
BC1	BLANK
BLneg21	BLANK
BLneg22	BLANK

## Sheet: S9_Table
S9 Table: Taxonomy composition at phylum level in the second chronic cohort
	Group	CON (n=17)																	INF (n=45)
	Phylum	T10	T11	T12	T13	T14	T15	T16	T17	T2	T20	T3	T4	T5	T6	T7	T8	T9	T21	T22	T23	T25	T28	T29	T30	T34	T38	T40	T41	T45	T47	T48	T53	T54	T24	T26	T27	T31	T32	T33	T35	T36	T39	T44	T46	T49	T50	T51	T52
	Bacteria_unassigned	25	6	5	10	0	0	6	0	3	9	13	5	16	0	0	0	7	7	12	20	0	0	26	0	0	0	9	0	6	7	0	82	34	8	14	14	17	7	6	28	4	0	2	0	0	13	8	39
	Actinobacteria	310	623	153	669	137	340	207	20	658	142	545	1168	817	91	6	10	686	43	38	693	0	0	71	13	0	867	20	0	196	100	14	62	59	34	83	47	167	668	256	304	933	106	1036	50	42	37	53	81
	Bacteroidetes	84	3	24	4	0	12	59	0	28	129	21	10	54	8	0	62	3	32	218	260	0	0	172	3	0	0	221	0	287	175	110	454	267	90	99	142	187	173	201	463	220	31	106	309	5	144	123	273
	Deferribacteres	0	0	0	0	0	0	0	0	0	1	0	0	0	0	0	0	0	0	0	0	0	0	0	0	0	0	0	0	0	0	0	0	0	0	0	0	0	0	0	0	0	0	0	0	0	0	0	0
	Firmicutes	1346	1364	1518	1323	1879	1658	1345	1911	1205	1655	1437	833	1128	1822	1968	1729	1301	1571	1660	983	2016	2016	1677	1953	2016	1149	1646	2016	1522	1711	1877	1358	1532	1837	1613	1763	1385	1139	1541	1126	849	1877	684	1612	1962	1812	1667	1477
	Proteobacteria	237	20	316	10	0	6	392	85	122	26	0	0	0	92	42	209	19	357	88	56	0	0	66	47	0	0	112	0	2	23	15	60	101	47	205	48	258	25	8	77	10	2	185	30	7	7	110	130
	TM7	0	0	0	0	0	0	7	0	0	51	0	0	1	0	0	0	0	3	0	0	0	0	4	0	0	0	3	0	0	0	0	0	0	0	2	2	2	4	4	0	0	0	3	0	0	3	0	0
	Tenericutes	0	0	0	0	0	0	0	0	0	3	0	0	0	0	0	0	0	0	0	0	0	0	0	0	0	0	0	0	0	0	0	0	0	0	0	0	0	0	0	0	0	0	0	0	0	0	0	0
	Verrucomicrobia	14	0	0	0	0	0	0	0	0	0	0	0	0	3	0	6	0	3	0	4	0	0	0	0	0	0	5	0	3	0	0	0	23	0	0	0	0	0	0	18	0	0	0	15	0	0	55	16
[truncated: 14 more columns]
